# Supplementary material for: New Pyranone Derivatives and Sesquiterpenoid Isolated from the Endophytic Fungus Xylaria sp. Z184
Source: MDPI journal article supplement (doi:10.3390/molecules29081728), 2024-04-11
Supplement: s1 [file s1]

## *Supplementary Material*

### **New pyranone derivatives and sesquiterpenoid isolated from the endophytic fungus *Xylaria* sp. Z184**

Yan Zhang<sup>a,†</sup>, Yang Jin<sup>a,†</sup>, Wensi Yan<sup>a</sup>, Peishan Gu<sup>a</sup>, Ziqian Zeng<sup>a</sup>, Ziying Li<sup>b</sup>, Guangtao Zhang<sup>b</sup>, Mi

Wei<sup>c</sup>, Yongbo Xue<sup>a,\*</sup>

#### *Affiliations:*

<sup>a</sup>*School of Pharmaceutical Sciences (Shenzhen), Shenzhen Campus of Sun Yat-sen University, Shenzhen, Guangdong 518107, P. R. China*

<sup>b</sup>*School of Pharmacy, Binzhou Medical University*

<sup>c</sup>*School of Agriculture, Shenzhen Campus of Sun Yat-sen University, Shenzhen, Guangdong 518107, P. R. China*

<sup>†</sup>Yan Zhang and Yang Jin contributed equally to this work.

E-mail: Yongbo Xue\*- xueyb@mail.sysu.edu.cn

Telephone number: 13660160614

ORCID: <http://orcid.org/0000-0001-9133-6439>

\* Corresponding author

## Contents

|                                                                                                     |    |
|-----------------------------------------------------------------------------------------------------|----|
| <b>Fig. S1</b> $^1\text{H}$ NMR spectrum of <b>1</b> in methanol- $d_4$ (600 MHz).                  | 6  |
| <b>Fig. S2</b> $^{13}\text{C}$ NMR spectrum of <b>1</b> in methanol- $d_4$ (150 MHz).               | 7  |
| <b>Fig. S3</b> HSQC spectrum of <b>1</b> in methanol- $d_4$ (600 MHz).                              | 8  |
| <b>Fig. S4</b> HMBC spectrum of <b>1</b> in methanol- $d_4$ (600 MHz).                              | 9  |
| <b>Fig. S5</b> $^1\text{H}$ - $^1\text{H}$ COSY spectrum of <b>1</b> in methanol- $d_4$ (600 MHz).  | 10 |
| <b>Fig. S6</b> ROESY spectrum of <b>1</b> in methanol- $d_4$ (600 MHz).                             | 11 |
| <b>Fig. S7</b> HRESIMS spectrum of <b>1</b> .                                                       | 12 |
| <b>Fig. S8</b> IR spectrum of <b>1</b> .                                                            | 13 |
| <b>Fig. S9</b> UV spectrum of <b>1</b> .                                                            | 14 |
| <b>Fig. S10</b> $^1\text{H}$ NMR spectrum of <b>2</b> in DMSO- $d_6$ (600 MHz).                     | 15 |
| <b>Fig. S11</b> $^{13}\text{C}$ NMR spectrum of <b>2</b> in DMSO- $d_6$ (150 MHz).                  | 16 |
| <b>Fig. S12</b> HSQC spectrum of <b>2</b> in DMSO- $d_6$ (600 MHz).                                 | 17 |
| <b>Fig. S13</b> HMBC spectrum of <b>2</b> in DMSO- $d_6$ (600 MHz).                                 | 18 |
| <b>Fig. S14</b> $^1\text{H}$ - $^1\text{H}$ COSY spectrum of <b>2</b> in DMSO- $d_6$ (600 MHz).     | 19 |
| <b>Fig. S15</b> ROESY spectrum of <b>2</b> in DMSO- $d_6$ (600 MHz).                                | 20 |
| <b>Fig. S16</b> $^1\text{H}$ NMR spectrum of <b>2</b> in methanol- $d_4$ (600 MHz).                 | 21 |
| <b>Fig. S17</b> $^{13}\text{C}$ NMR spectrum of <b>2</b> in methanol- $d_4$ (150 MHz).              | 22 |
| <b>Fig. S18</b> HSQC spectrum of <b>2</b> in methanol- $d_4$ (600 MHz).                             | 23 |
| <b>Fig. S19</b> HMBC spectrum of <b>2</b> in methanol- $d_4$ (600 MHz).                             | 24 |
| <b>Fig. S20</b> $^1\text{H}$ - $^1\text{H}$ COSY spectrum of <b>2</b> in methanol- $d_4$ (600 MHz). | 25 |
| <b>Fig. S21</b> ROESY spectrum of <b>2</b> in methanol- $d_4$ (600 MHz).                            | 26 |
| <b>Fig. S22</b> $^1\text{H}$ NMR spectrum of <b>2</b> in pyridine- $d_5$ (600 MHz).                 | 27 |
| <b>Fig. S23</b> 1D-TOCSY spectrum of <b>2</b> in pyridine- $d_5$ (800 MHz).                         | 28 |
| <b>Fig. S24</b> $^{13}\text{C}$ NMR spectrum of <b>2</b> in pyridine- $d_5$ (150 MHz).              | 29 |
| <b>Fig. S25</b> HSQC spectrum of <b>2</b> in pyridine- $d_5$ (600 MHz).                             | 30 |
| <b>Fig. S26</b> HMBC spectrum of <b>2</b> in pyridine- $d_5$ (600 MHz).                             | 31 |
| <b>Fig. S27</b> $^1\text{H}$ - $^1\text{H}$ COSY spectrum of <b>2</b> in pyridine- $d_5$ (600 MHz). | 32 |
| <b>Fig. S28</b> HRESIMS spectrum of <b>2</b> .                                                      | 33 |
| <b>Fig. S29</b> IR spectrum of <b>2</b> .                                                           | 34 |
| <b>Fig. S30</b> UV spectrum of <b>2</b> .                                                           | 35 |

|                                                                                                          |    |
|----------------------------------------------------------------------------------------------------------|----|
| <b>Fig. S31</b> $^1\text{H}$ NMR spectrum of <b>3</b> in DMSO- $d_6$ (600 MHz).....                      | 36 |
| <b>Fig. S32</b> $^{13}\text{C}$ NMR spectrum of <b>3</b> in DMSO- $d_6$ (600 MHz).....                   | 37 |
| <b>Fig. S33</b> HSQC spectrum of <b>3</b> in DMSO- $d_6$ (600 MHz). ....                                 | 38 |
| <b>Fig. S34</b> HMBC spectrum of <b>3</b> in DMSO- $d_6$ (600 MHz). ....                                 | 39 |
| <b>Fig. S35</b> $^1\text{H}$ - $^1\text{H}$ COSY spectrum of <b>3</b> in DMSO- $d_6$ (600 MHz).....      | 40 |
| <b>Fig. S36</b> ROESY spectrum of <b>3</b> in DMSO- $d_6$ (600 MHz). ....                                | 41 |
| <b>Fig. S37</b> $^1\text{H}$ NMR Spectrum of <b>3</b> in methanol- $d_4$ (600 MHz).....                  | 42 |
| <b>Fig. S38</b> $^{13}\text{C}$ NMR spectrum of <b>3</b> in methanol- $d_4$ (600 MHz). ....              | 43 |
| <b>Fig. S39</b> HSQC spectrum of <b>3</b> in methanol- $d_4$ (600 MHz). ....                             | 44 |
| <b>Fig. S40</b> HMBC spectrum of <b>3</b> in methanol- $d_4$ (600 MHz). ....                             | 45 |
| <b>Fig. S41</b> $^1\text{H}$ - $^1\text{H}$ COSY spectrum of <b>3</b> in methanol- $d_4$ (600 MHz).....  | 46 |
| <b>Fig. S42</b> ROESY spectrum of <b>3</b> in methanol- $d_4$ (600 MHz).....                             | 47 |
| <b>Fig. S43</b> $^1\text{H}$ NMR spectrum of <b>3</b> in pyridine- $d_5$ (600 MHz). ....                 | 48 |
| <b>Fig. S44</b> 1D-TOCSY spectrum of <b>3</b> in pyridine- $d_5$ (800 MHz). ....                         | 49 |
| <b>Fig. S45</b> $^{13}\text{C}$ NMR spectrum of <b>3</b> in pyridine- $d_5$ (150 MHz).....               | 50 |
| <b>Fig. S46</b> HSQC spectrum of <b>3</b> in pyridine- $d_5$ (600 MHz).....                              | 51 |
| <b>Fig. S47</b> HMBC spectrum of <b>3</b> in pyridine- $d_5$ (600 MHz).....                              | 52 |
| <b>Fig. S48</b> $^1\text{H}$ - $^1\text{H}$ COSY spectrum of <b>2</b> in pyridine- $d_5$ (600 MHz). .... | 53 |
| <b>Fig. S49</b> HRESIMS spectrum of <b>3</b> . ....                                                      | 54 |
| <b>Fig. S50</b> IR spectrum of <b>3</b> . ....                                                           | 55 |
| <b>Fig. S51</b> UV spectrum of <b>3</b> .....                                                            | 56 |
| <b>Fig. S52</b> $^1\text{H}$ NMR Spectrum of <b>4</b> in chloroform- $d$ (600 MHz). ....                 | 57 |
| <b>Fig. S53</b> $^1\text{H}$ NMR Spectrum of <b>4</b> in chloroform- $d$ (600 MHz) (expanded). ....      | 58 |
| <b>Fig. S54</b> $^{13}\text{C}$ NMR Spectrum of <b>4</b> in chloroform- $d$ (150 MHz).....               | 59 |
| <b>Fig. S56</b> HMBC Spectrum of <b>4</b> in chloroform- $d$ (600 MHz).....                              | 61 |
| <b>Fig. S57</b> $^1\text{H}$ - $^1\text{H}$ COSY Spectrum of <b>4</b> in chloroform- $d$ (600 MHz). .... | 62 |
| <b>Fig. S58</b> ROESY Spectrum of <b>4</b> in chloroform- $d$ (600 MHz). ....                            | 63 |
| <b>Fig. S59</b> ROESY Spectrum of <b>4</b> in chloroform- $d$ (600 MHz) (expanded). ....                 | 64 |
| <b>Fig. S60</b> ROESY Spectrum of <b>4</b> in chloroform- $d$ (600 MHz) (expanded). ....                 | 65 |
| <b>Fig. S61</b> $^1\text{H}$ NMR Spectrum of <b>4</b> in DMSO- $d_6$ (600 MHz). ....                     | 66 |
| <b>Fig. S62</b> $^{13}\text{C}$ NMR Spectrum of <b>4</b> in DMSO- $d_6$ (150 MHz). ....                  | 67 |
| <b>Fig. S63</b> HSQC Spectrum of <b>4</b> in DMSO- $d_6$ (600 MHz).....                                  | 68 |

|                                                                                                                            |    |
|----------------------------------------------------------------------------------------------------------------------------|----|
| <b>Fig. S64</b> HMBC Spectrum of <b>4</b> in DMSO- <i>d</i> <sub>6</sub> (600 MHz).....                                    | 69 |
| <b>Fig. S65</b> <sup>1</sup> H– <sup>1</sup> H COSY Spectrum of <b>4</b> in DMSO- <i>d</i> <sub>6</sub> (600 MHz).....     | 70 |
| <b>Fig. S66</b> ROESY Spectrum of <b>4</b> in DMSO- <i>d</i> <sub>6</sub> (600 MHz).....                                   | 71 |
| <b>Fig. S67</b> ROESY Spectrum of <b>4</b> in DMSO- <i>d</i> <sub>6</sub> (600 MHz) (expanded).....                        | 72 |
| <b>Fig. S68</b> HRESIMS Spectrum of <b>4</b> . ....                                                                        | 73 |
| <b>Fig. S69</b> IR Spectrum of <b>4</b> .....                                                                              | 74 |
| <b>Fig. S70</b> UV Spectrum of <b>4</b> . ....                                                                             | 75 |
| <b>Fig. S71</b> <sup>1</sup> H NMR Spectrum of <b>5</b> in methanol- <i>d</i> <sub>4</sub> (600 MHz). ....                 | 76 |
| <b>Fig. S72</b> <sup>13</sup> C NMR Spectrum of <b>5</b> in methanol- <i>d</i> <sub>4</sub> (150 MHz). ....                | 77 |
| <b>Fig. S73</b> The DEPT Spectrum of <b>5</b> in methanol- <i>d</i> <sub>4</sub> (150 MHz). ....                           | 78 |
| <b>Fig. S74</b> HSQC Spectrum of <b>5</b> in methanol- <i>d</i> <sub>4</sub> (600 MHz).....                                | 79 |
| <b>Fig. S75</b> HMBC Spectrum of <b>5</b> in methanol- <i>d</i> <sub>4</sub> (600 MHz).....                                | 80 |
| <b>Fig. S76</b> <sup>1</sup> H– <sup>1</sup> H COSY Spectrum of <b>5</b> in methanol- <i>d</i> <sub>4</sub> (600 MHz)..... | 81 |
| <b>Fig. S77</b> HRESIMS Spectrum of <b>5</b> . ....                                                                        | 82 |
| <b>Fig. S78</b> IR Spectrum of <b>5</b> .....                                                                              | 83 |
| <b>Fig. S79</b> UV Spectrum of <b>5</b> . ....                                                                             | 84 |
| <b>Fig. S80</b> <sup>1</sup> H NMR spectrum of <b>6</b> in DMSO- <i>d</i> <sub>6</sub> (600 MHz).....                      | 85 |
| <b>Fig. S81</b> <sup>13</sup> C NMR spectrum of <b>6</b> in DMSO- <i>d</i> <sub>6</sub> (150 MHz).....                     | 85 |
| <b>Fig. S82</b> <sup>1</sup> H NMR spectrum of <b>7</b> in chloroform- <i>d</i> (600 MHz).....                             | 86 |
| <b>Fig. S83</b> <sup>13</sup> C NMR spectrum of <b>7</b> in chloroform- <i>d</i> (150 MHz).....                            | 86 |
| <b>Fig. S84</b> <sup>1</sup> H NMR spectrum of <b>8</b> in methanol- <i>d</i> <sub>4</sub> (600 MHz). ....                 | 87 |
| <b>Fig. S85</b> <sup>13</sup> C NMR spectrum of <b>8</b> in methanol- <i>d</i> <sub>4</sub> (150 MHz). ....                | 87 |
| <b>Fig. S86</b> <sup>1</sup> H NMR spectrum of <b>9</b> in methanol- <i>d</i> <sub>4</sub> (600 MHz). ....                 | 88 |
| <b>Fig. S87</b> <sup>13</sup> C NMR spectrum of <b>9</b> in methanol- <i>d</i> <sub>4</sub> (150 MHz). ....                | 88 |
| <b>Fig. S88</b> <sup>1</sup> H NMR spectrum of <b>10</b> in methanol- <i>d</i> <sub>4</sub> (400 MHz). ....                | 89 |
| <b>Fig. S89</b> <sup>13</sup> C NMR spectrum of <b>10</b> in methanol- <i>d</i> <sub>4</sub> (100 MHz). ....               | 89 |
| <b>Fig. S90</b> <sup>1</sup> H NMR spectrum of <b>11</b> in methanol- <i>d</i> <sub>4</sub> (600 MHz).....                 | 90 |
| <b>Fig. S91</b> <sup>13</sup> C NMR spectrum of <b>11</b> in methanol- <i>d</i> <sub>4</sub> (150 MHz).....                | 90 |
| <b>Fig. S92</b> <sup>1</sup> H NMR spectrum of <b>12</b> in methanol- <i>d</i> <sub>4</sub> (600 MHz). ....                | 91 |
| <b>Fig. S93</b> <sup>13</sup> C NMR spectrum of <b>12</b> in methanol- <i>d</i> <sub>4</sub> (150 MHz). ....               | 91 |
| <b>Fig. S94</b> <sup>1</sup> H NMR spectrum of <b>13</b> in methanol- <i>d</i> <sub>4</sub> (600 MHz). ....                | 92 |
| <b>Fig. S95</b> <sup>13</sup> C NMR spectrum of <b>13</b> in methanol- <i>d</i> <sub>4</sub> (150 MHz). ....               | 92 |

|                                                                                                               |    |
|---------------------------------------------------------------------------------------------------------------|----|
| <b>Fig. S96</b> $^1\text{H}$ NMR spectrum of <b>14</b> in chloroform- <i>d</i> (600 MHz).....                 | 93 |
| <b>Fig. S97</b> $^{13}\text{C}$ NMR spectrum of <b>14</b> in chloroform- <i>d</i> (150 MHz).....              | 93 |
| <b>Fig. S98</b> $^1\text{H}$ NMR spectrum of <b>15</b> in chloroform- <i>d</i> (600 MHz).....                 | 94 |
| <b>Fig. S99</b> $^{13}\text{C}$ NMR spectrum of <b>15</b> in chloroform- <i>d</i> (150 MHz).....              | 94 |
| <b>Fig. S100</b> $^1\text{H}$ NMR spectrum of <b>16</b> in methanol- <i>d</i> <sub>4</sub> (600 MHz).....     | 95 |
| <b>Fig. S101</b> $^{13}\text{C}$ NMR spectrum of <b>16</b> in methanol- <i>d</i> <sub>4</sub> (150 MHz). .... | 95 |
| <b>Fig. S102</b> $^1\text{H}$ NMR spectrum of <b>17</b> in methanol- <i>d</i> <sub>4</sub> (600 MHz).....     | 96 |
| <b>Fig. S103</b> $^{13}\text{C}$ NMR spectrum of <b>17</b> in methanol- <i>d</i> <sub>4</sub> (150 MHz). .... | 96 |
| <b>Fig. S104</b> $^1\text{H}$ NMR spectrum of <b>18</b> in chloroform- <i>d</i> (600 MHz).....                | 97 |
| <b>Fig. S105</b> $^{13}\text{C}$ NMR spectrum of <b>18</b> in chloroform- <i>d</i> (150 MHz).....             | 97 |
| <b>Fig. S106</b> The TLC and HPLC profiles of the crude extract of fungus <i>Xylaria</i> sp. Z184. ....       | 98 |

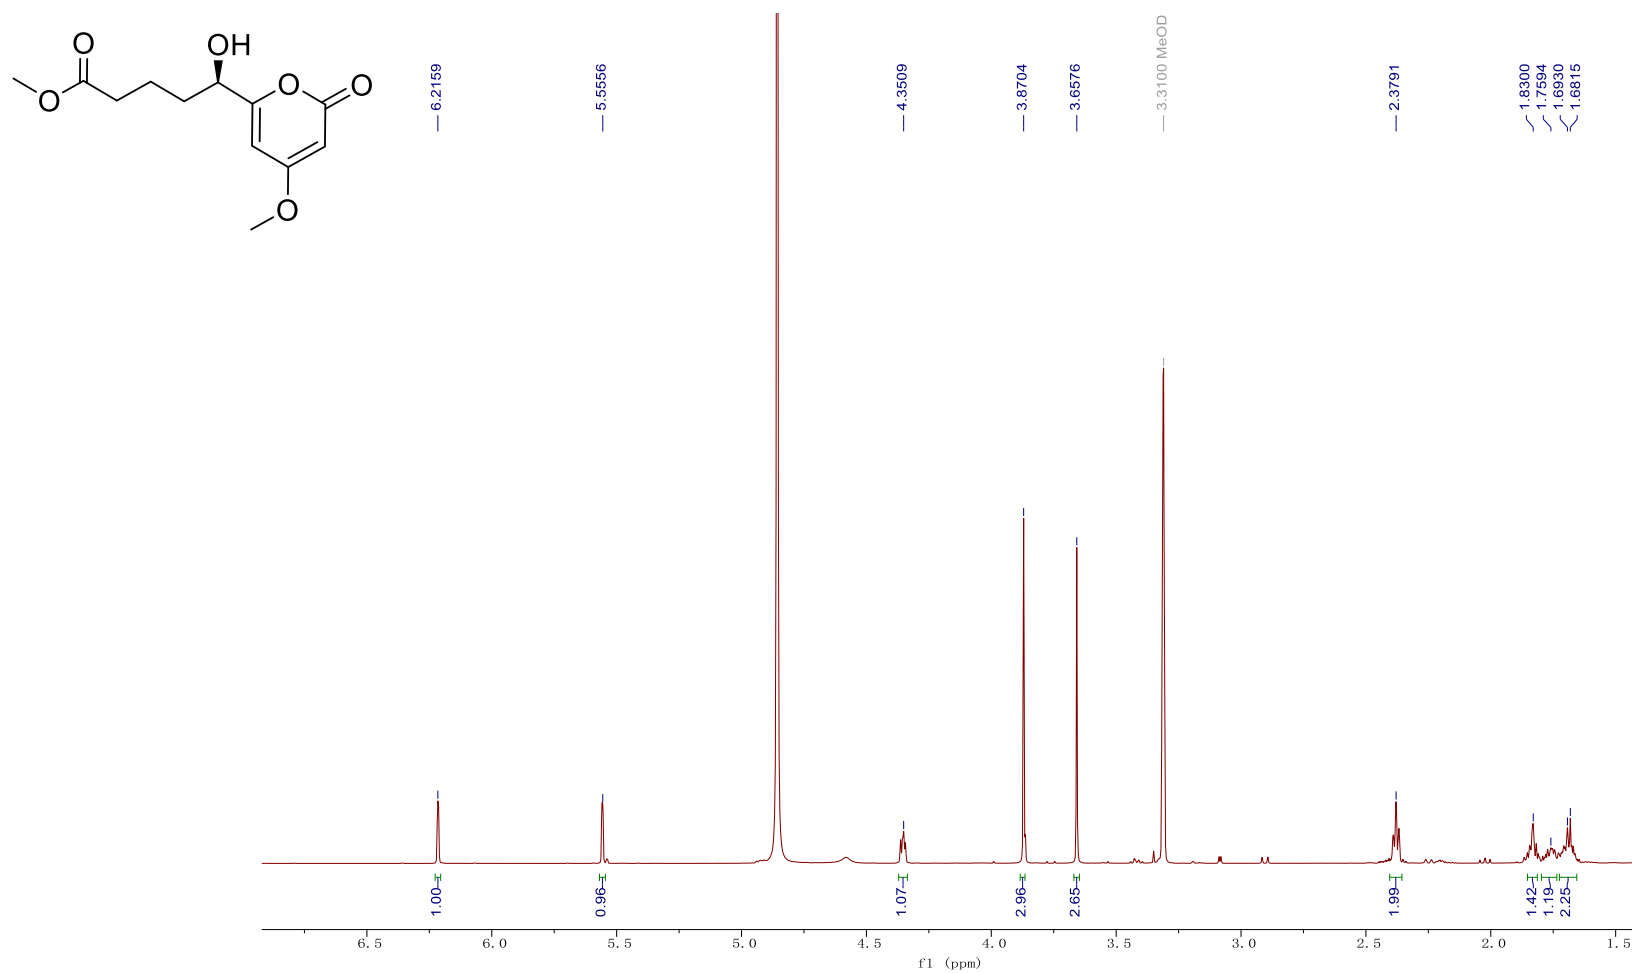

**Fig. S1** <sup>1</sup>H NMR spectrum of **1** in methanol-*d*<sub>4</sub> (600 MHz).

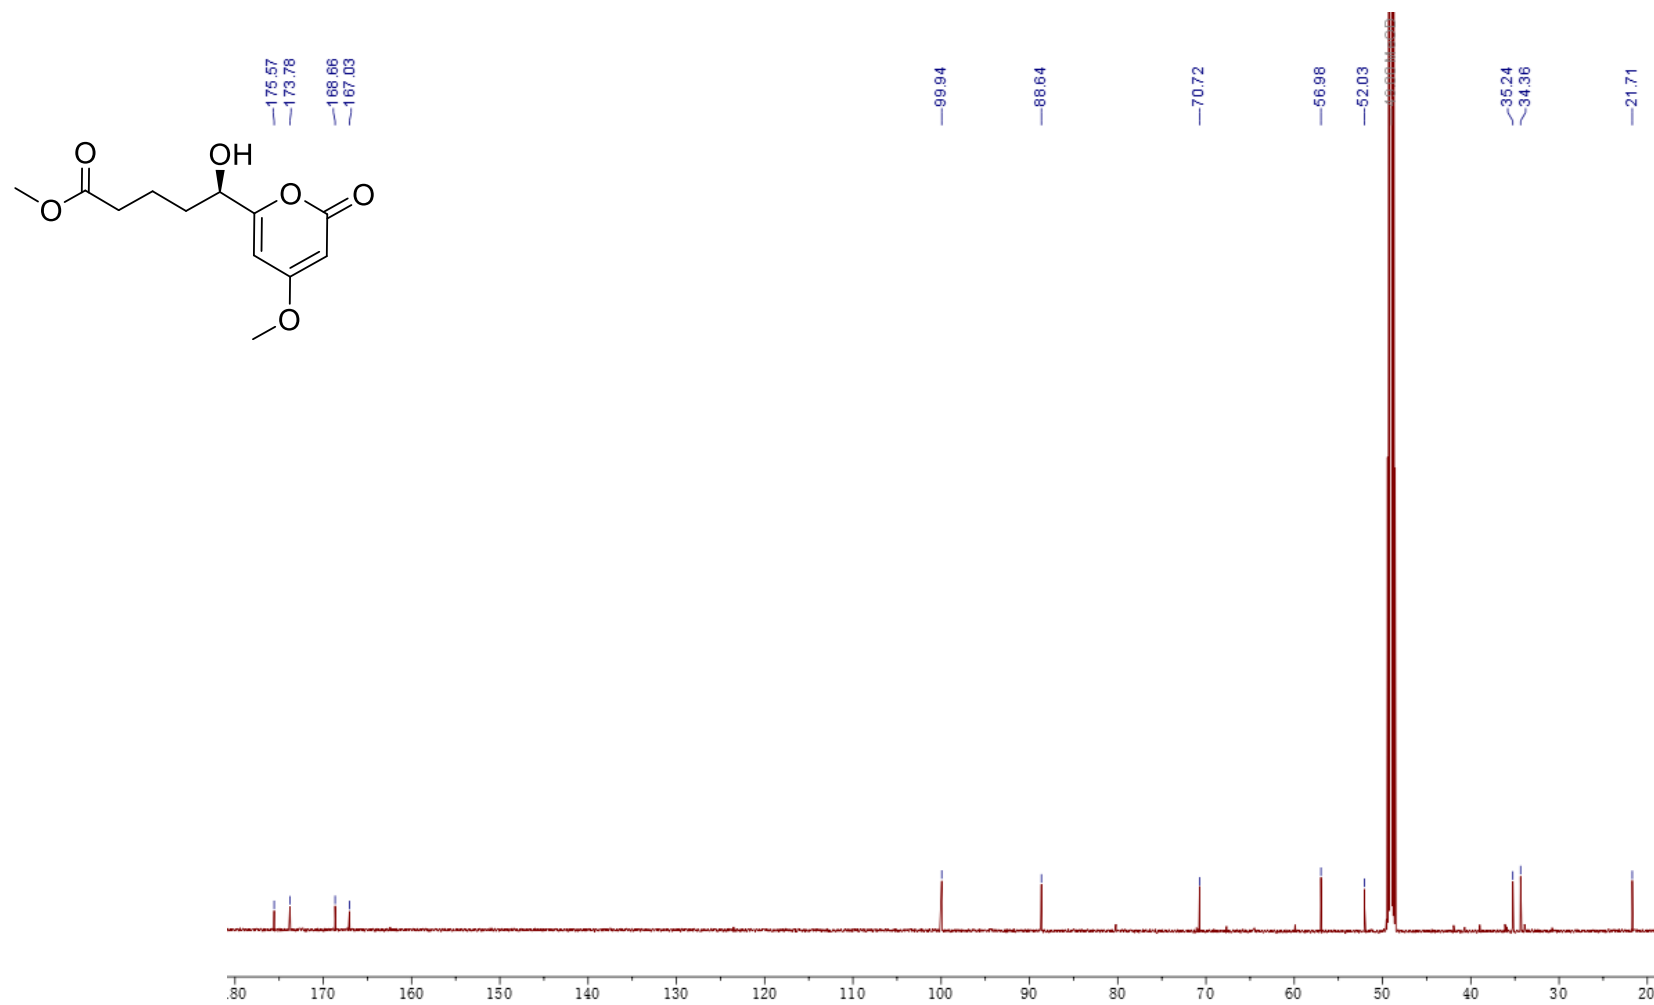

**Fig. S2** <sup>13</sup>C NMR spectrum of **1** in methanol-*d*<sub>4</sub> (150 MHz).

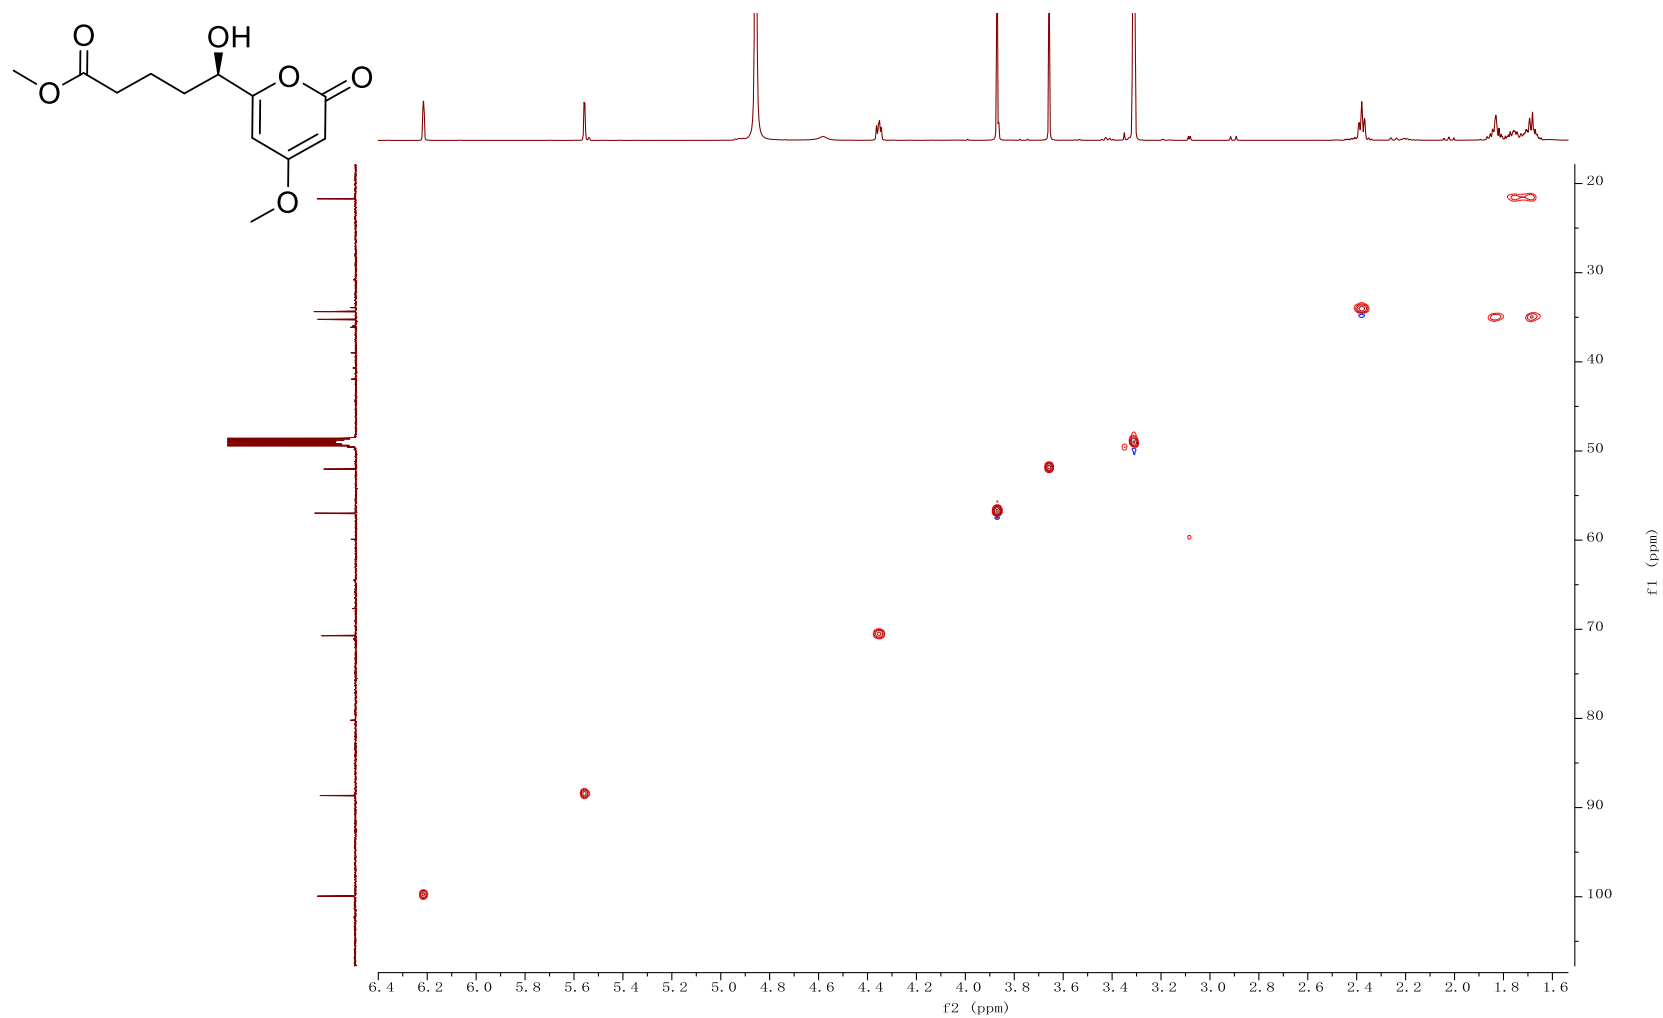

**Fig. S3** HSQC spectrum of **1** in methanol- $d_4$  (600 MHz).





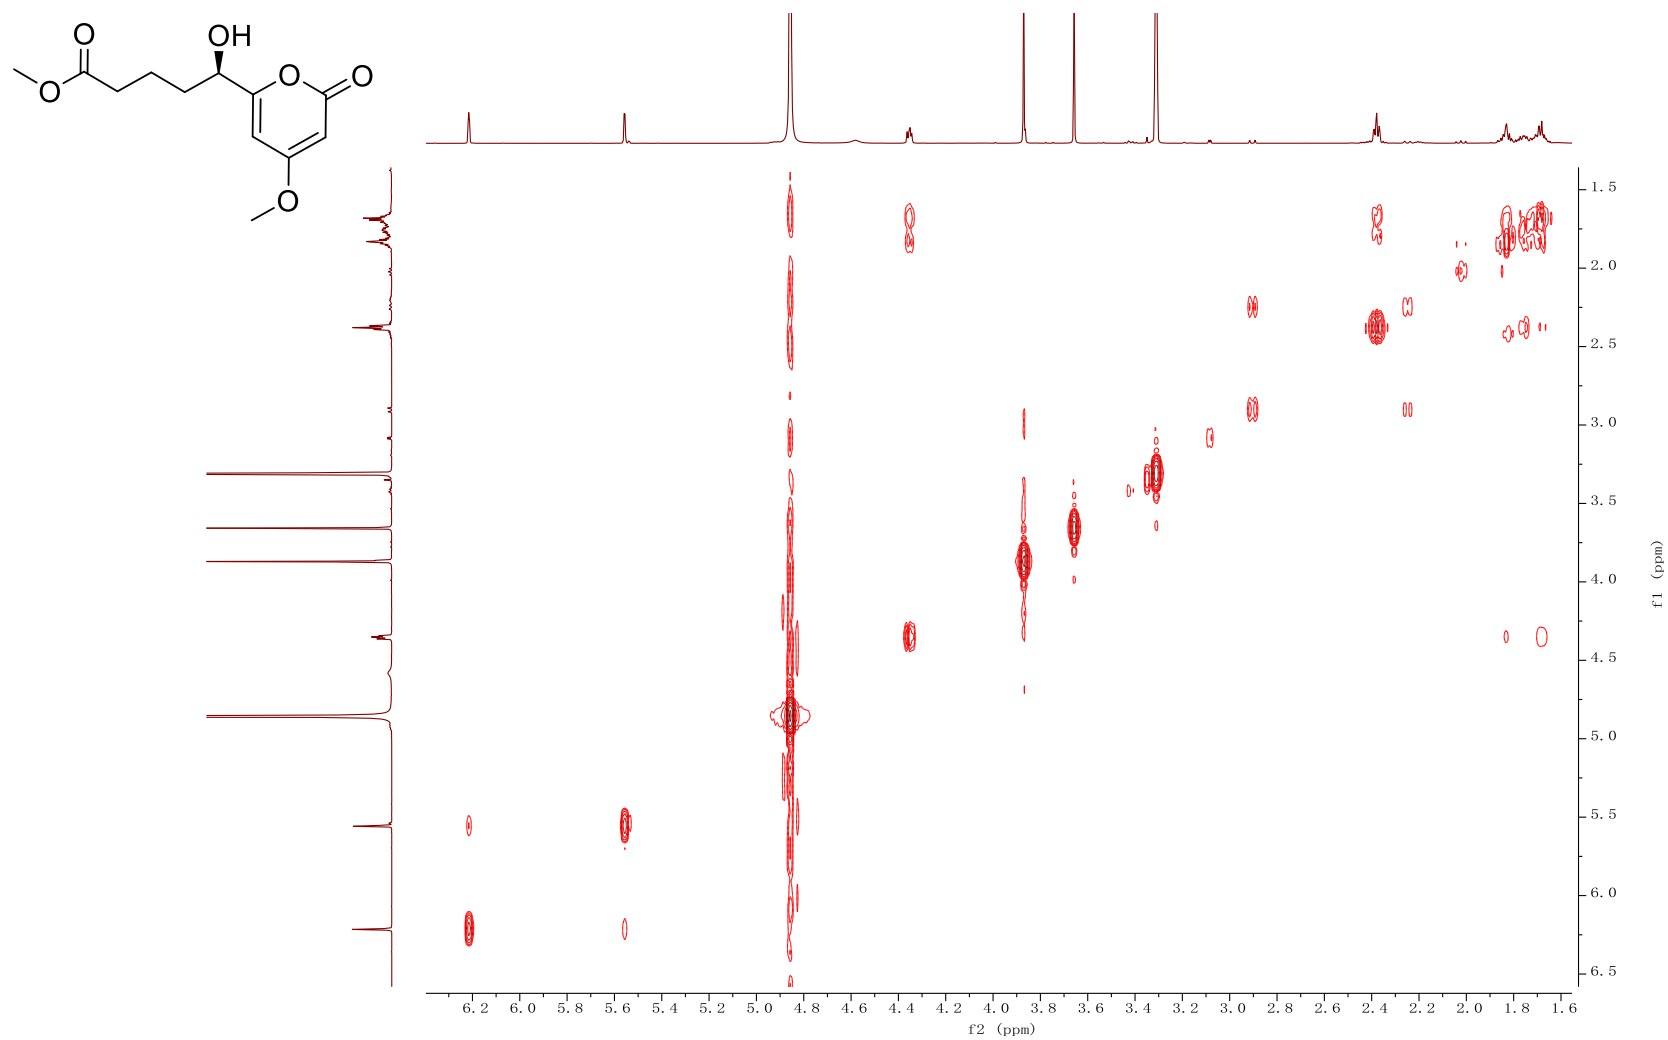

**Fig. S5**  $^1\text{H}$ - $^1\text{H}$  COSY spectrum of **1** in methanol- $d_4$  (600 MHz).

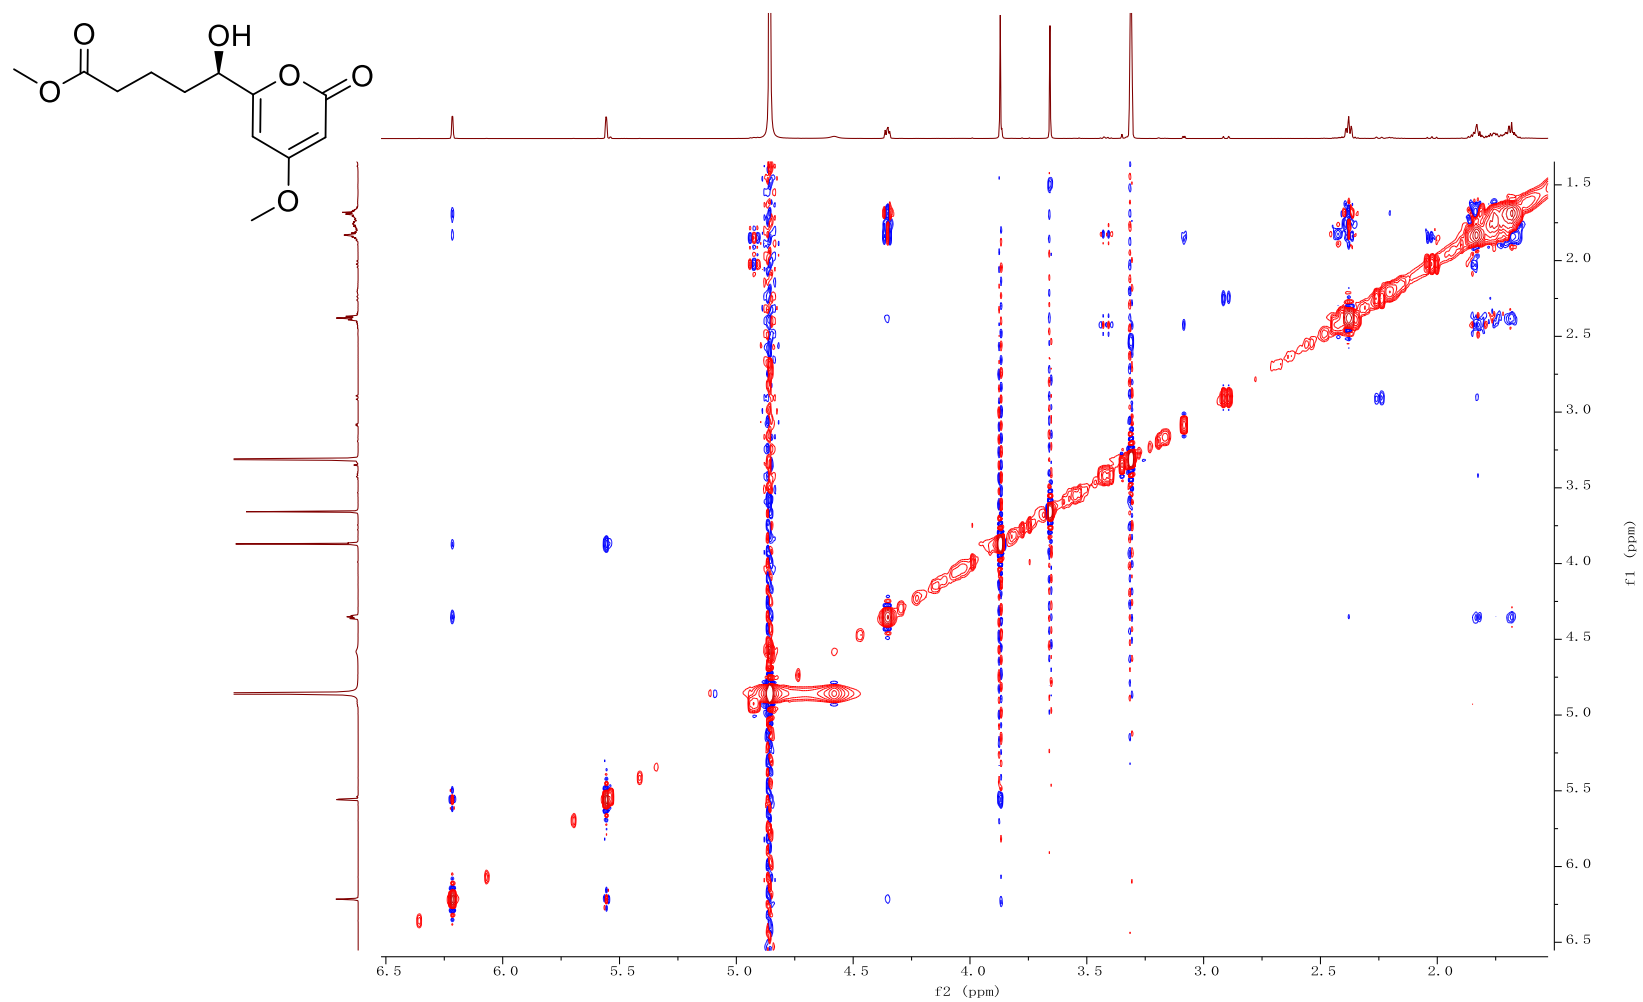

**Fig. S6** ROESY spectrum of **1** in methanol- $d_4$  (600 MHz).

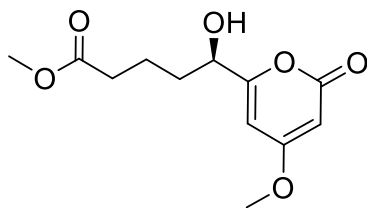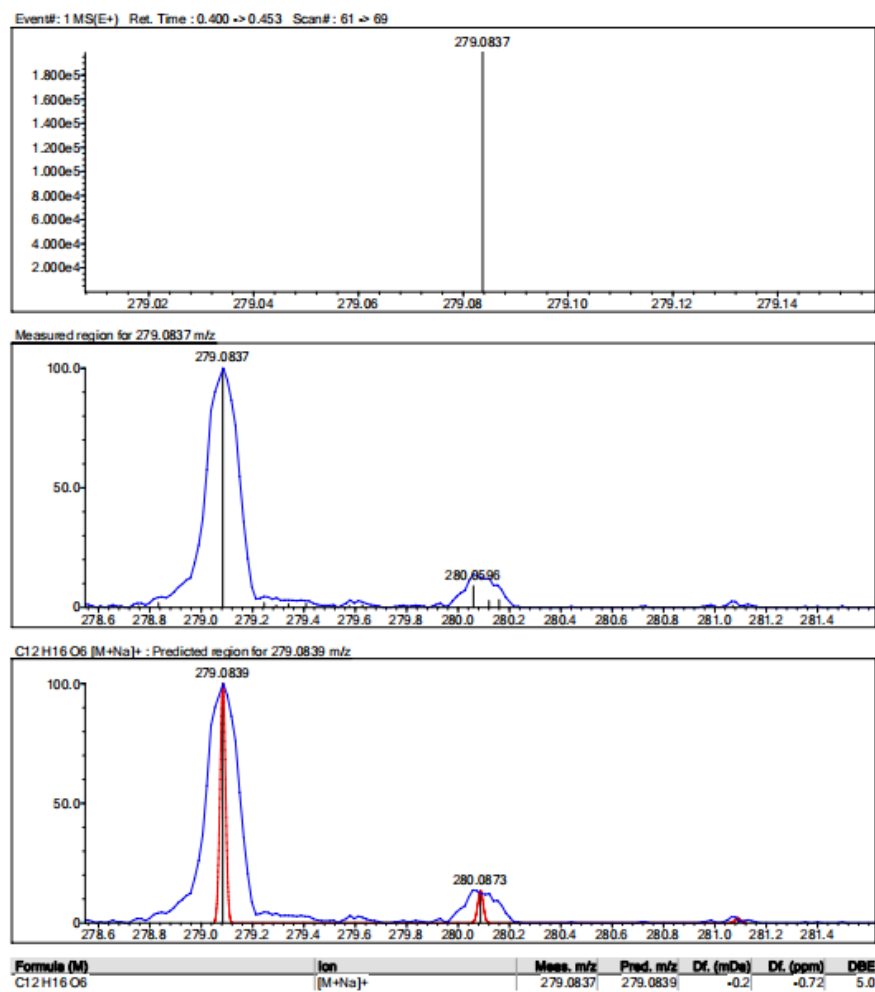

Fig. S7 HRESIMS spectrum of 1.

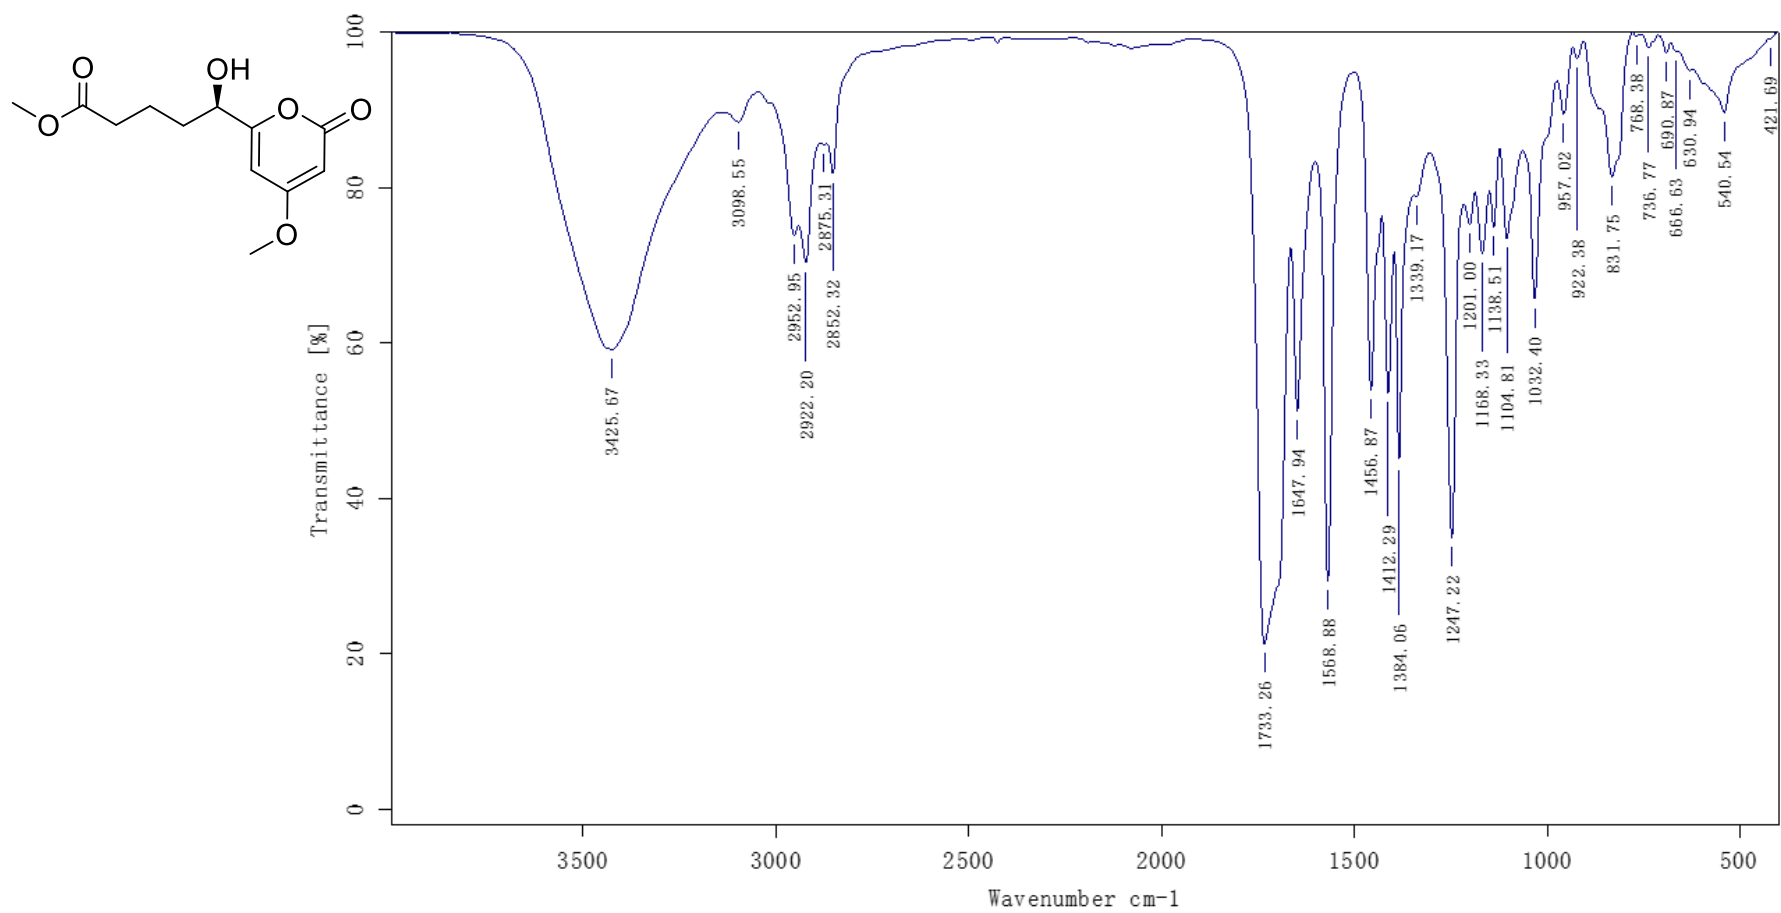

**Fig. S8** IR spectrum of **1**.

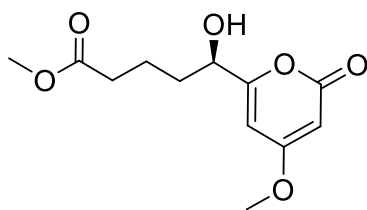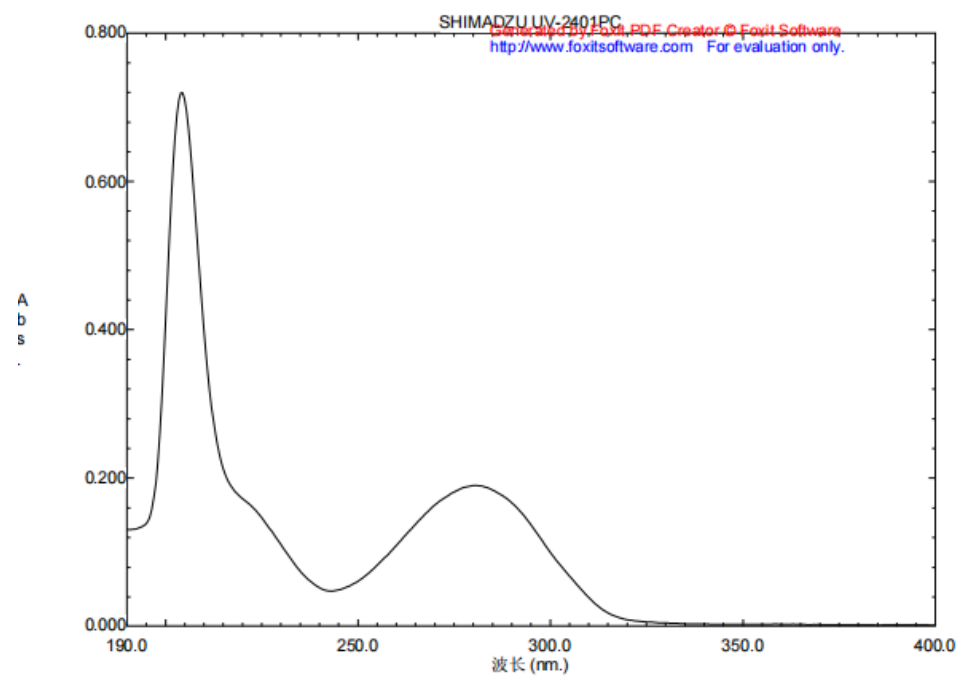

**Fig. S9** UV spectrum of **1**.

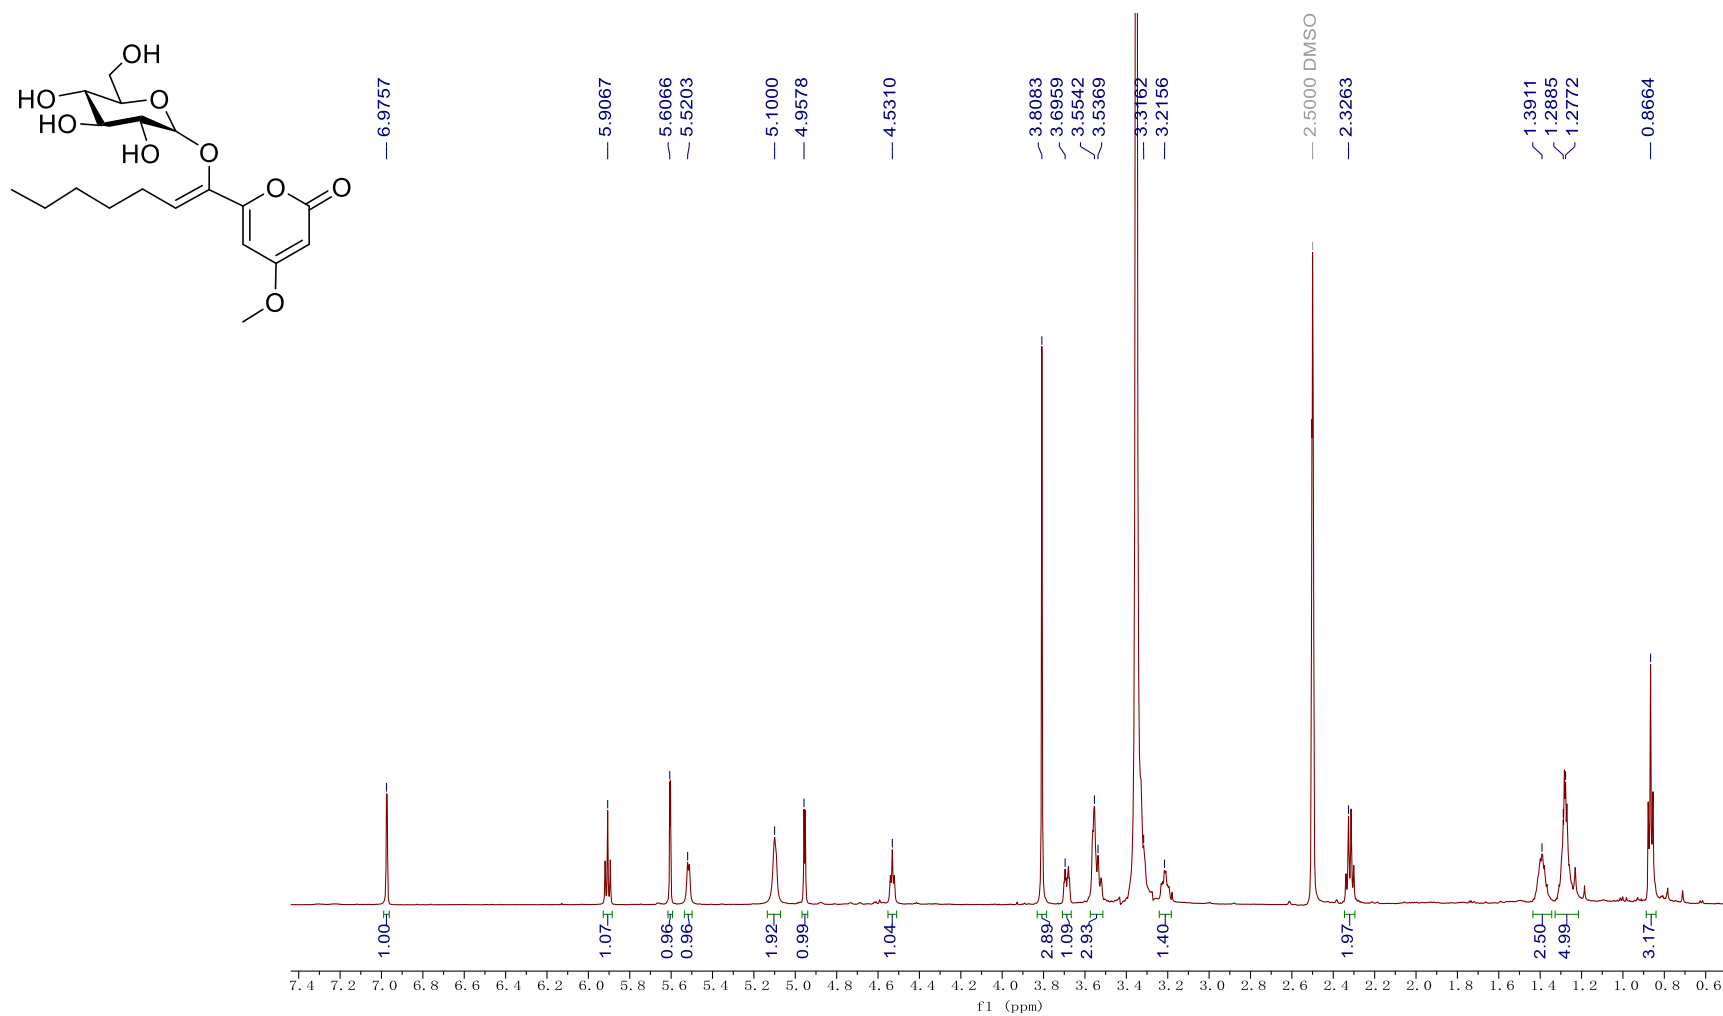

**Fig. S10**  $^1\text{H}$  NMR spectrum of **2** in  $\text{DMSO}-d_6$  (600 MHz).

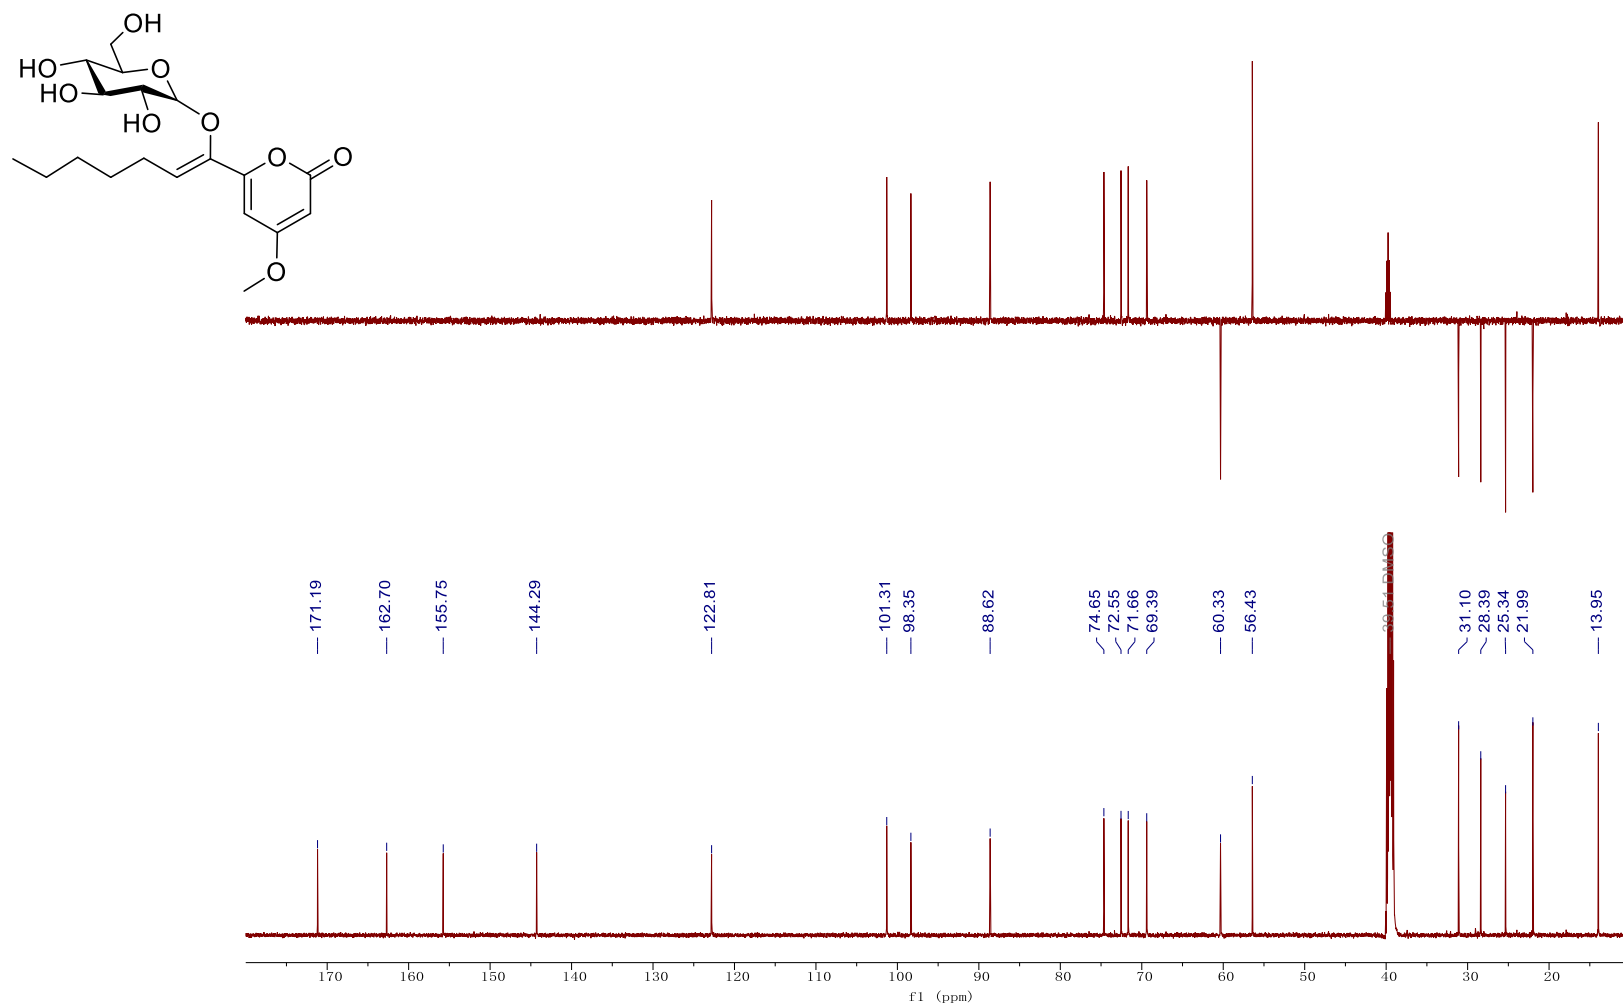

**Fig. S11**  $^{13}\text{C}$  NMR spectrum of **2** in  $\text{DMSO}-d_6$  (150 MHz).



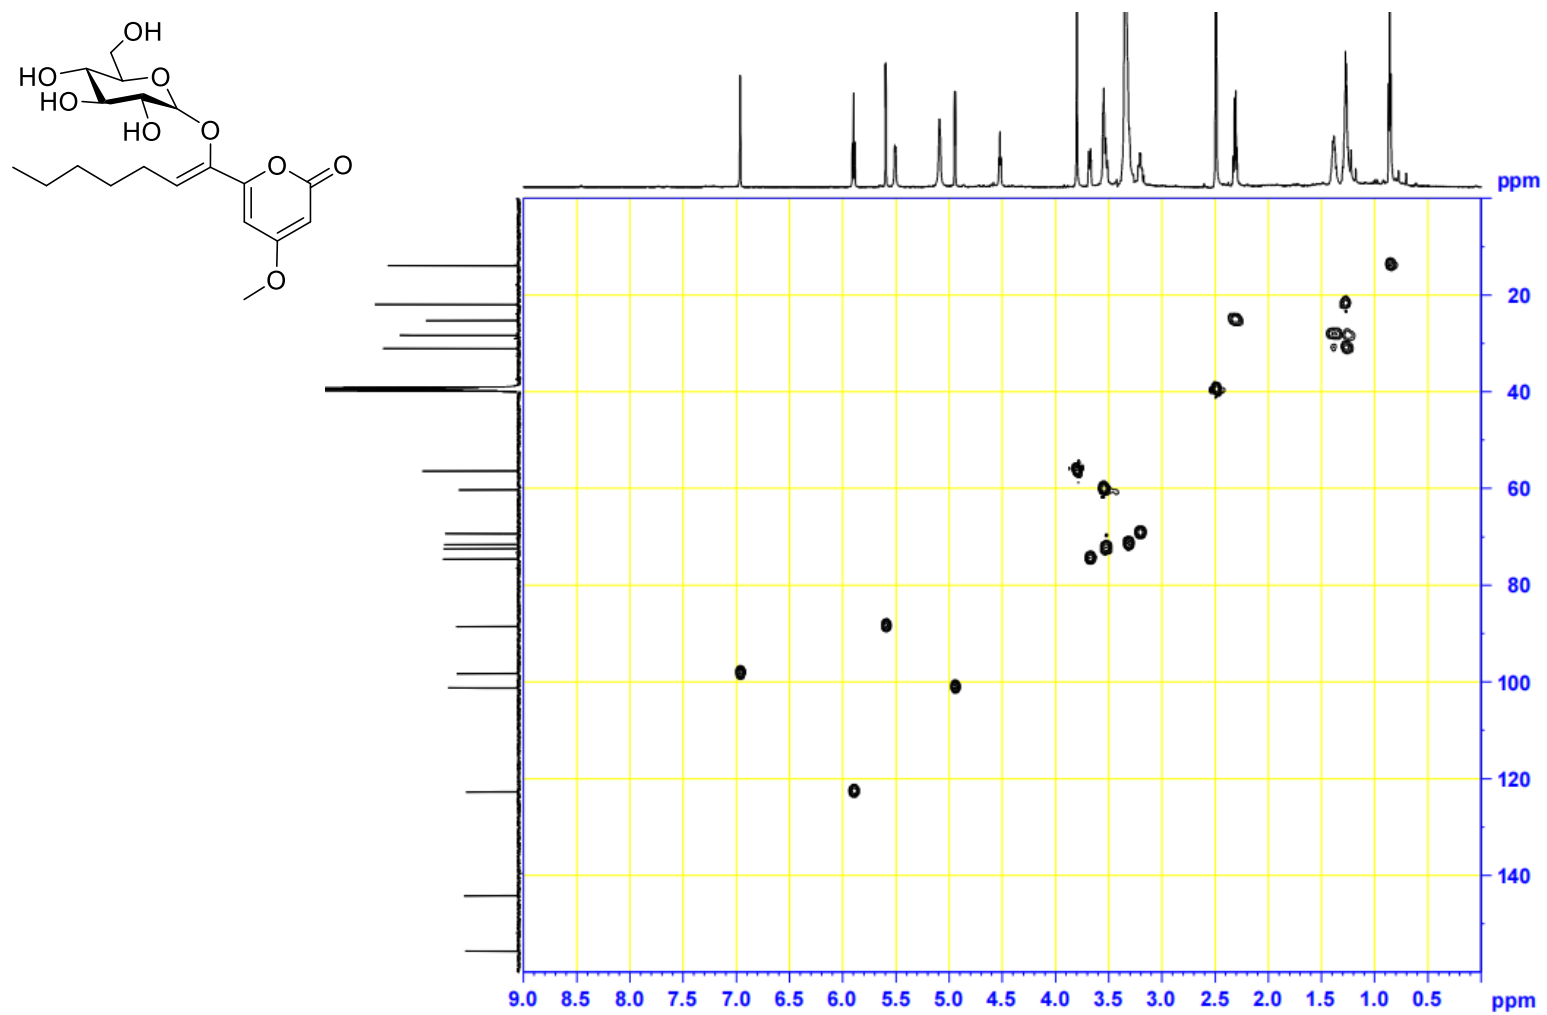

**Fig. S12** HSQC spectrum of **2** in DMSO-*d*<sub>6</sub> (600 MHz).

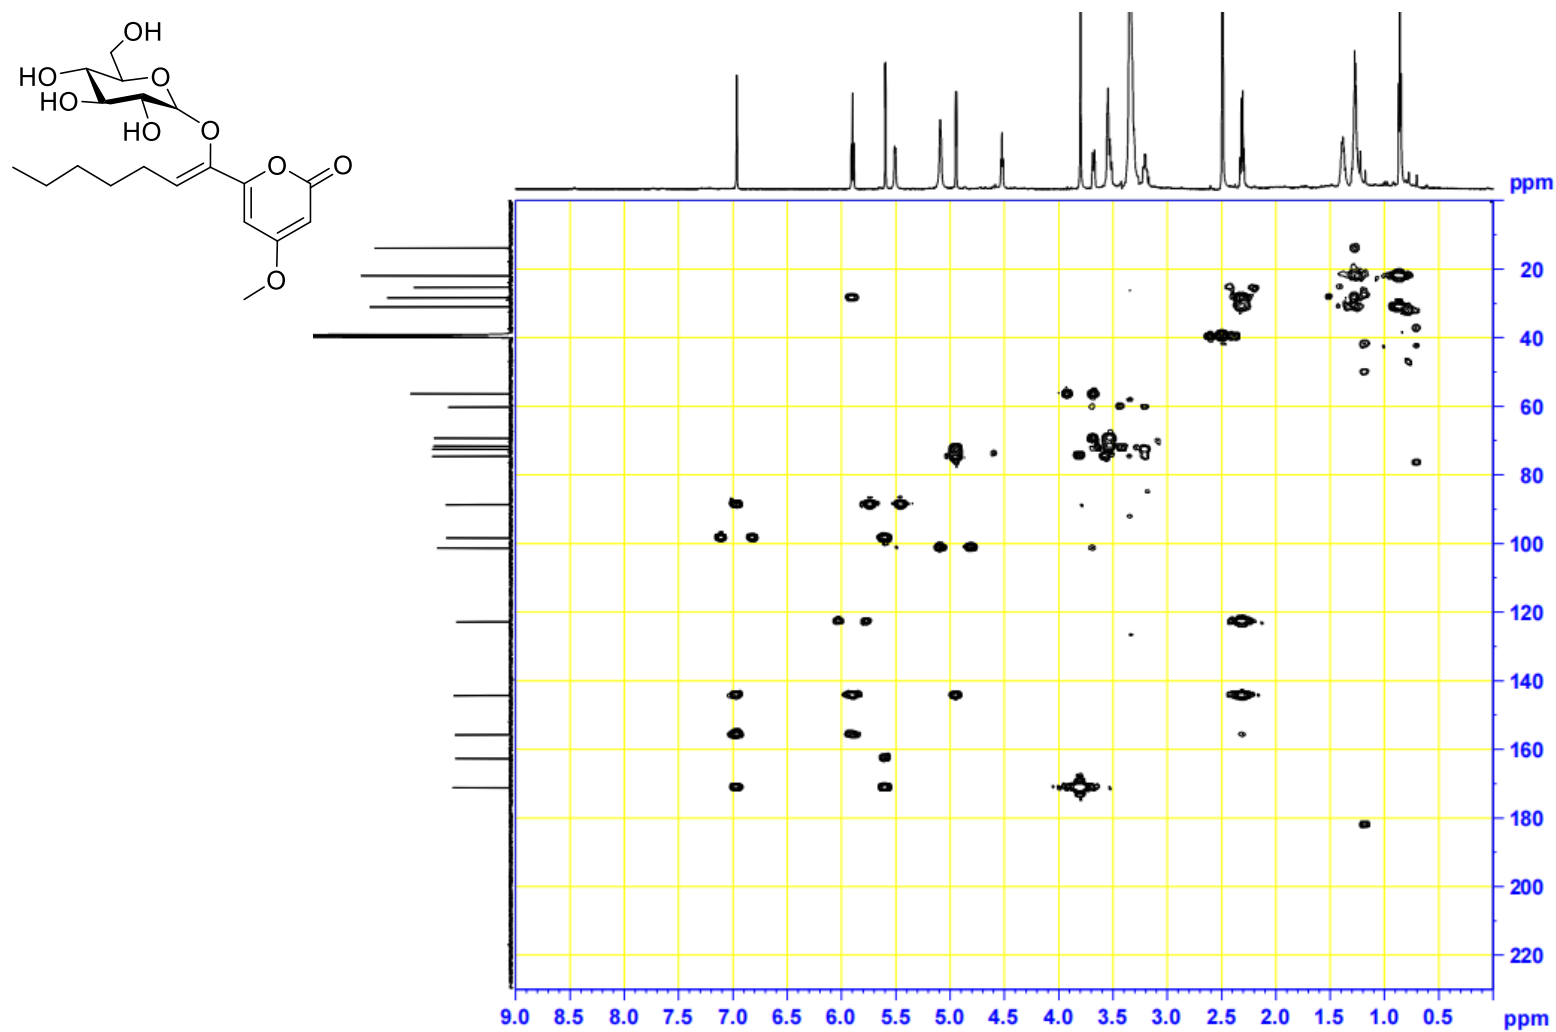

**Fig. S13** HMBC spectrum of **2** in DMSO-*d*<sub>6</sub> (600 MHz).

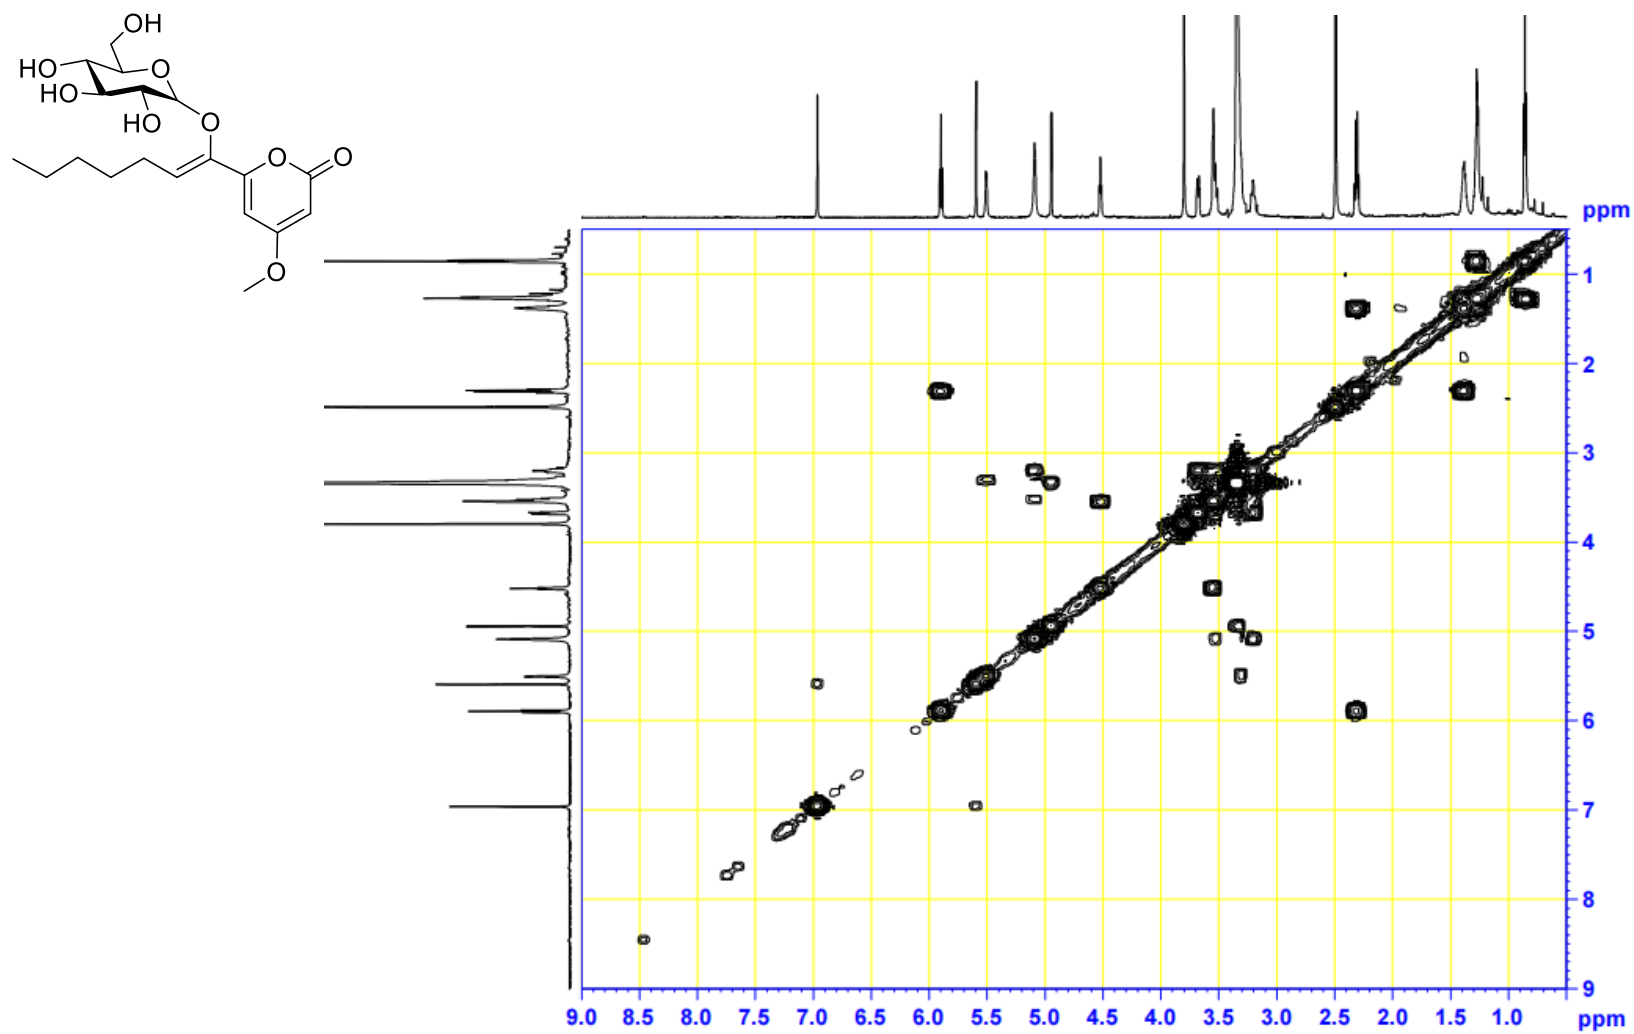

**Fig. S14**  $^1\text{H}$ - $^1\text{H}$  COSY spectrum of **2** in  $\text{DMSO}-d_6$  (600 MHz).

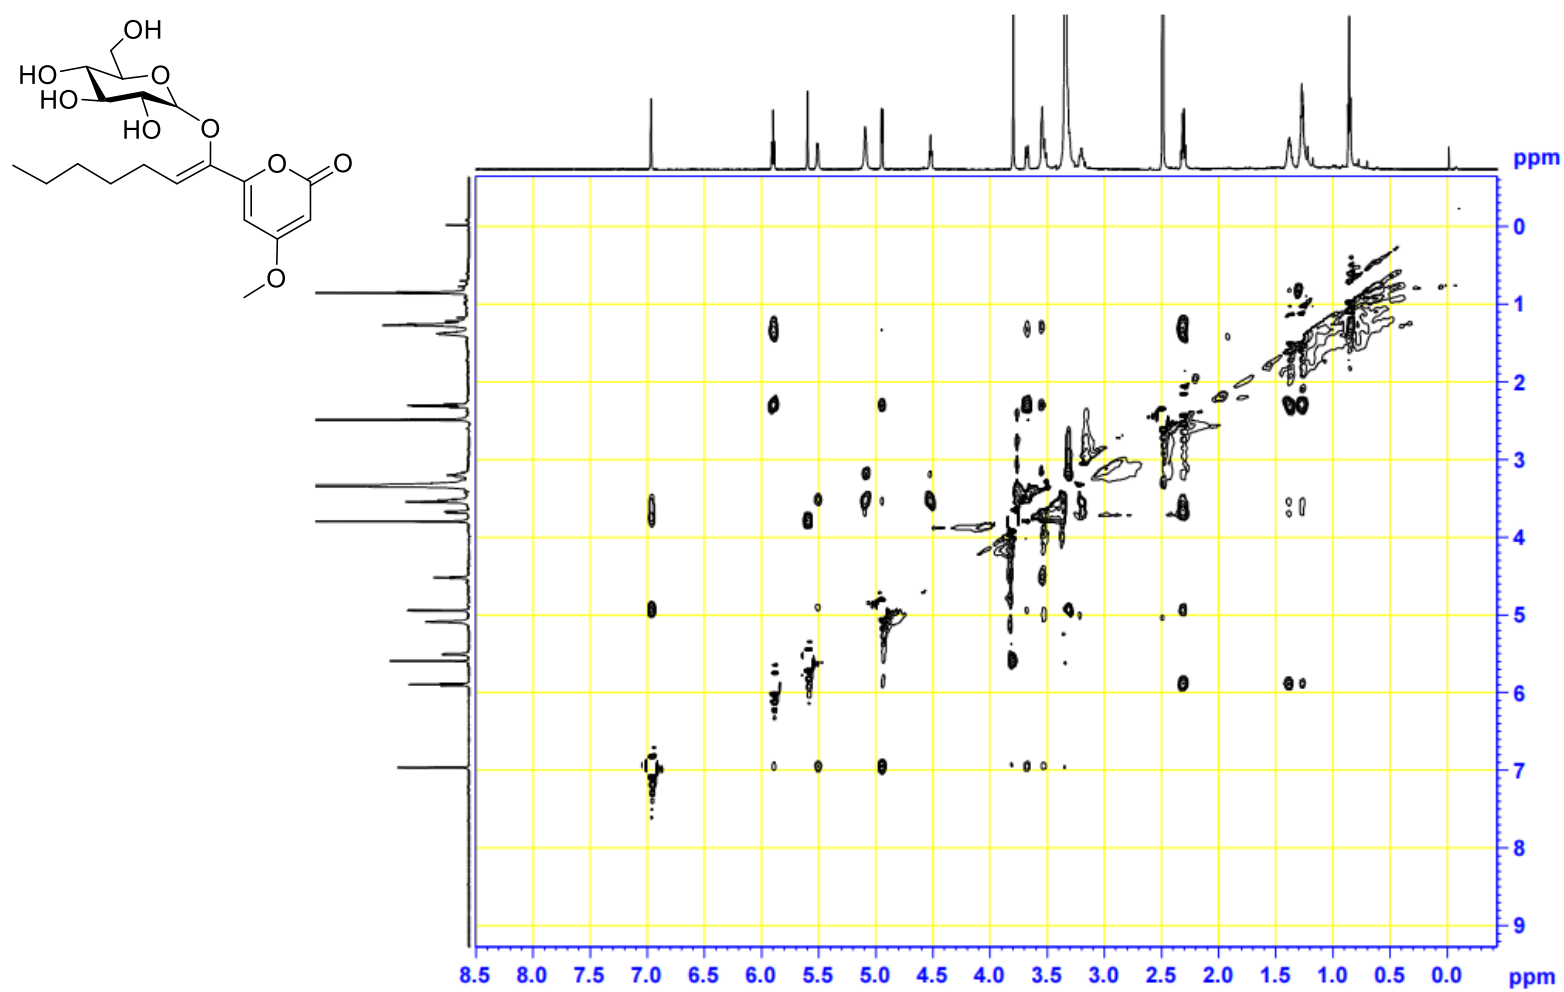

Fig. S15 ROESY spectrum of 2 in DMSO- $d_6$  (600 MHz).

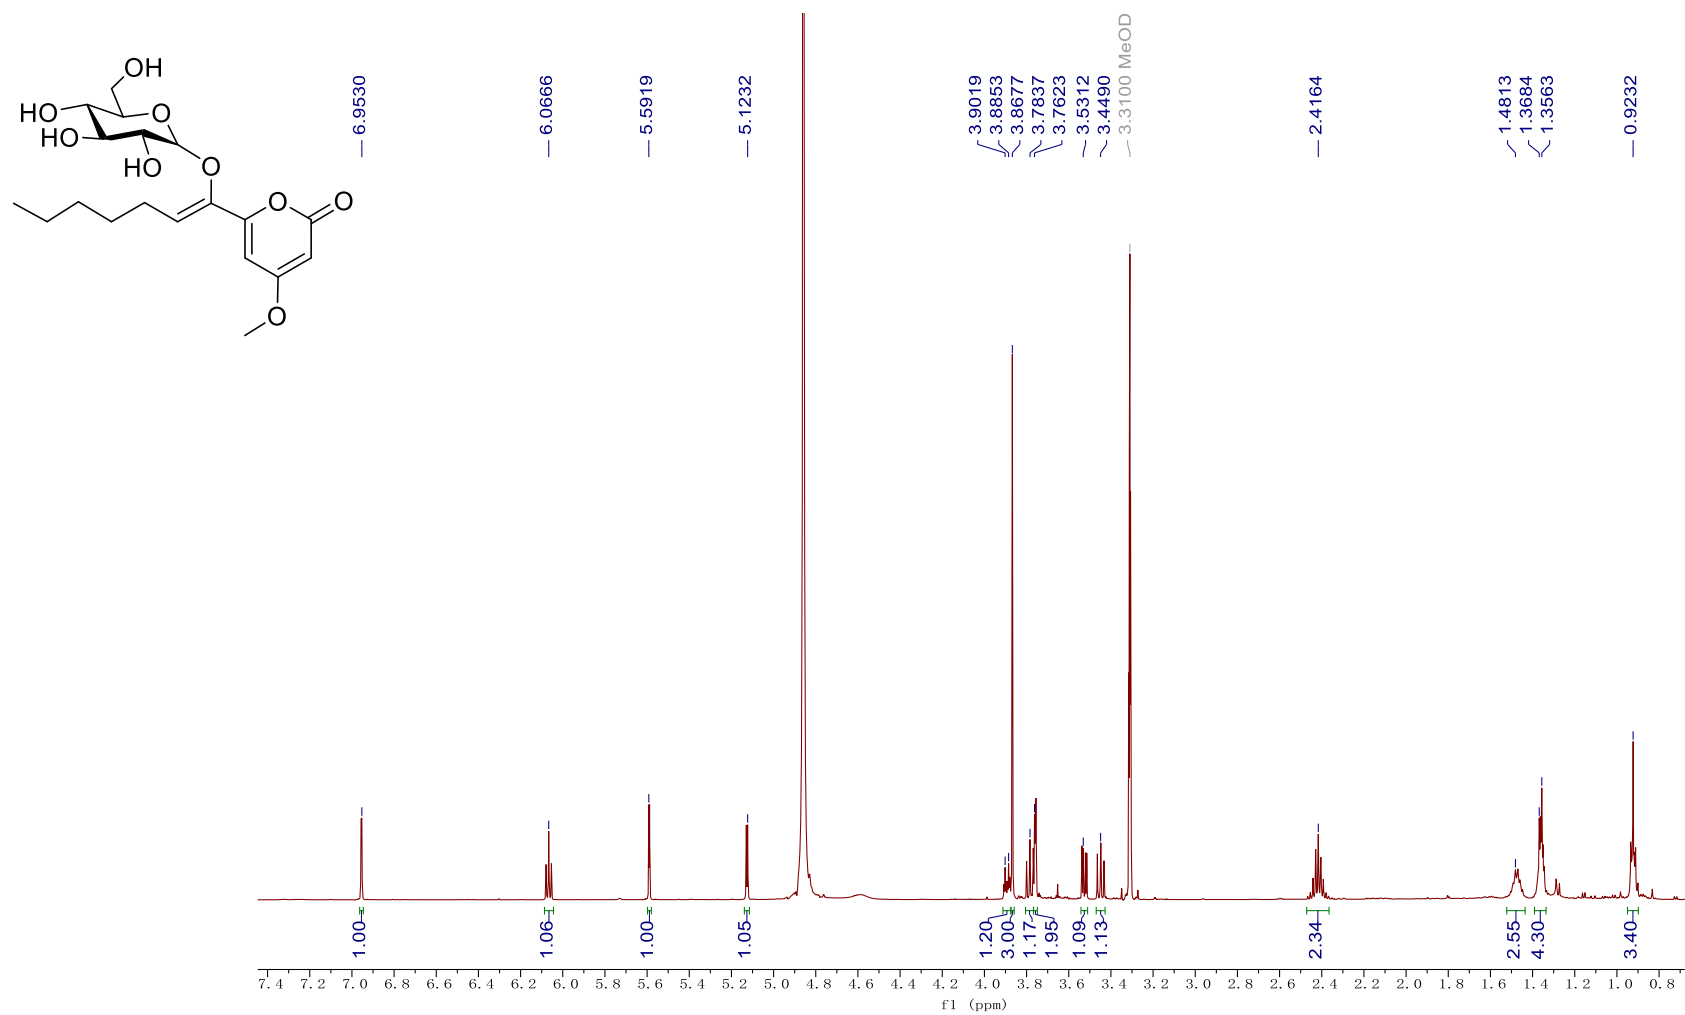

**Fig. S16** <sup>1</sup>H NMR spectrum of **2** in methanol-*d*<sub>4</sub> (600 MHz).

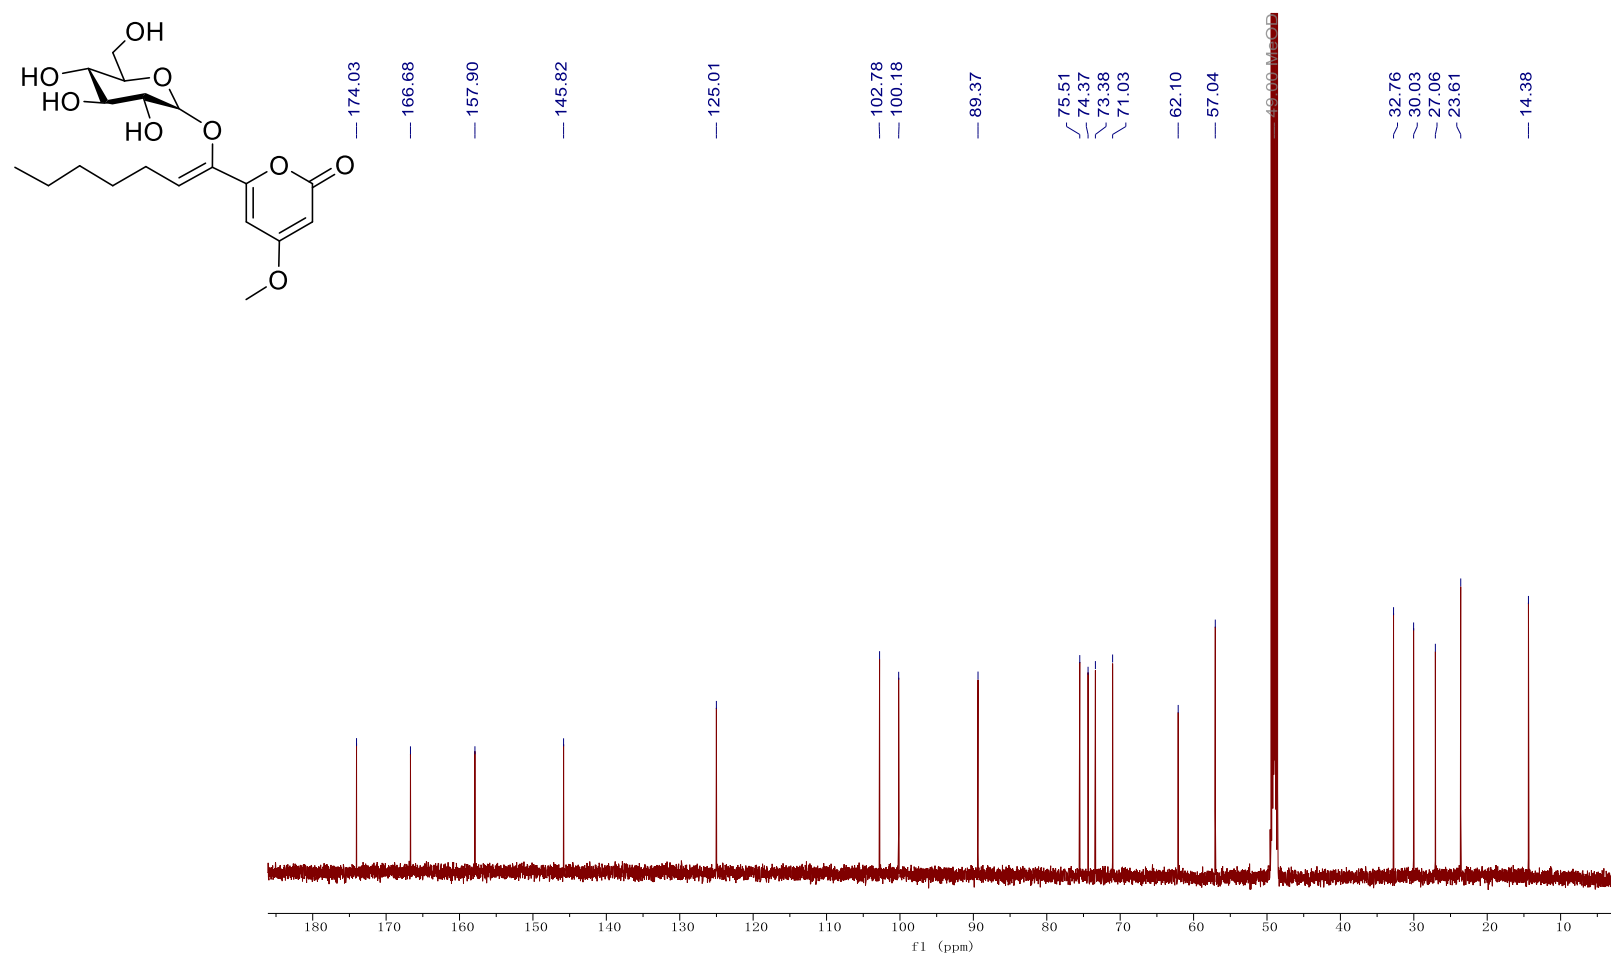

**Fig. S17**  $^{13}\text{C}$  NMR spectrum of **2** in methanol-*d*<sub>4</sub> (150 MHz).

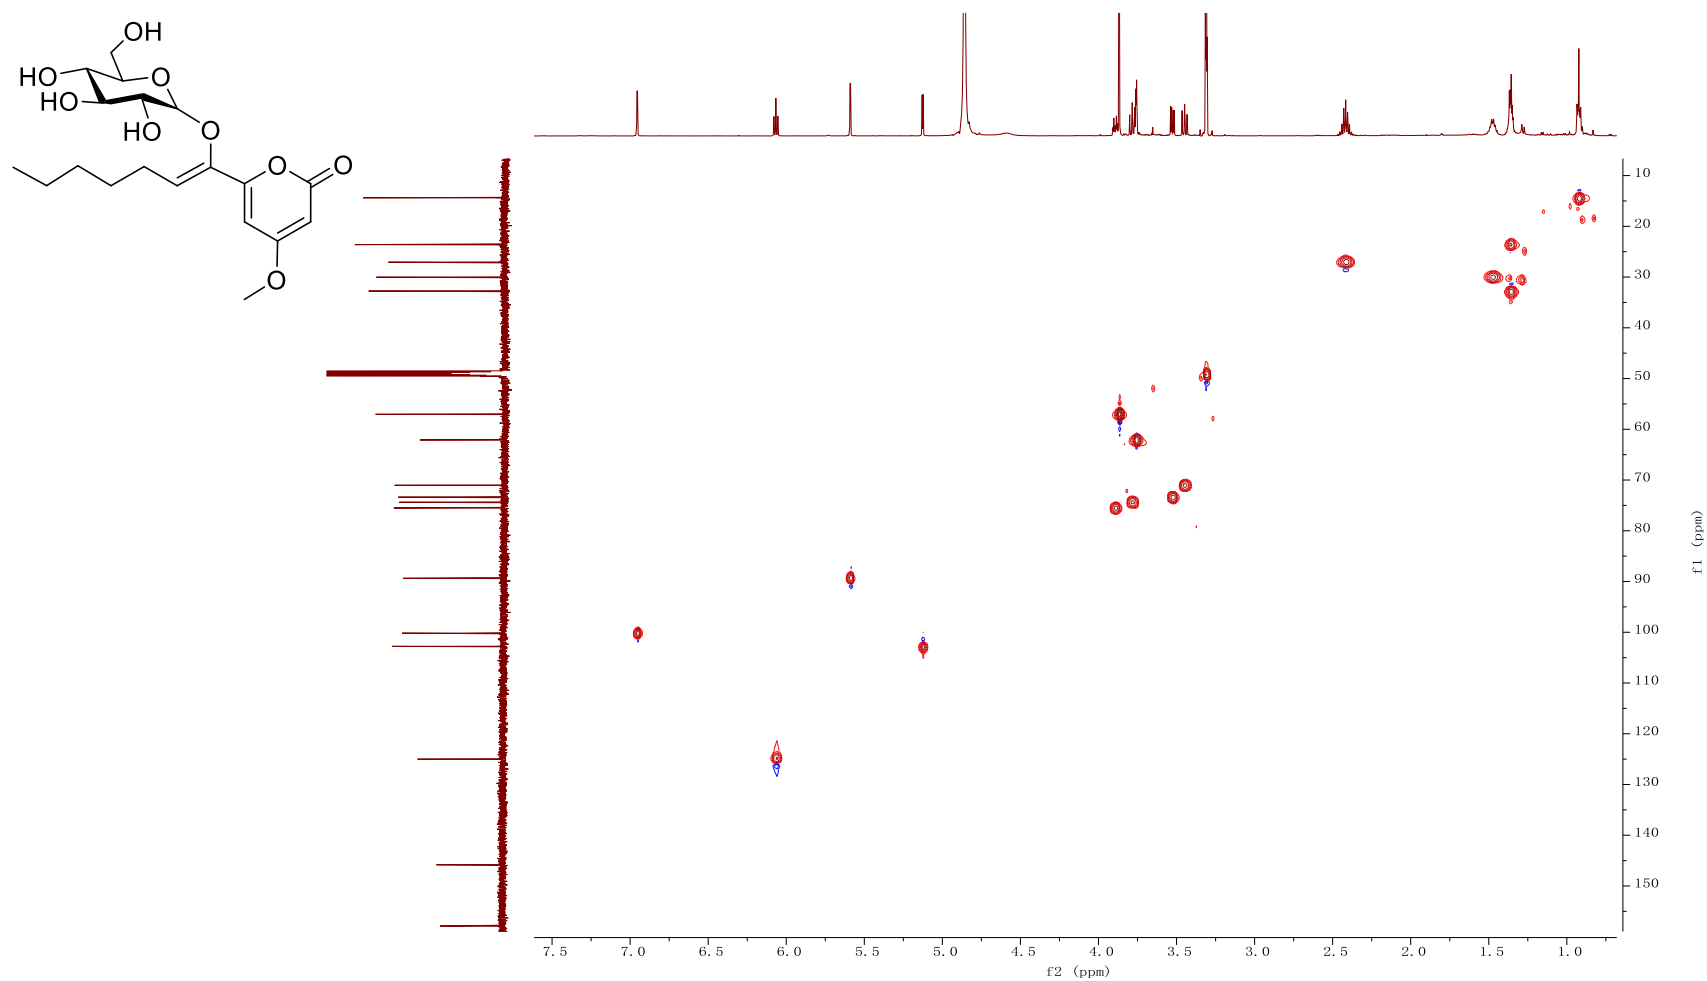

**Fig. S18** HSQC spectrum of **2** in methanol- $d_4$  (600 MHz).

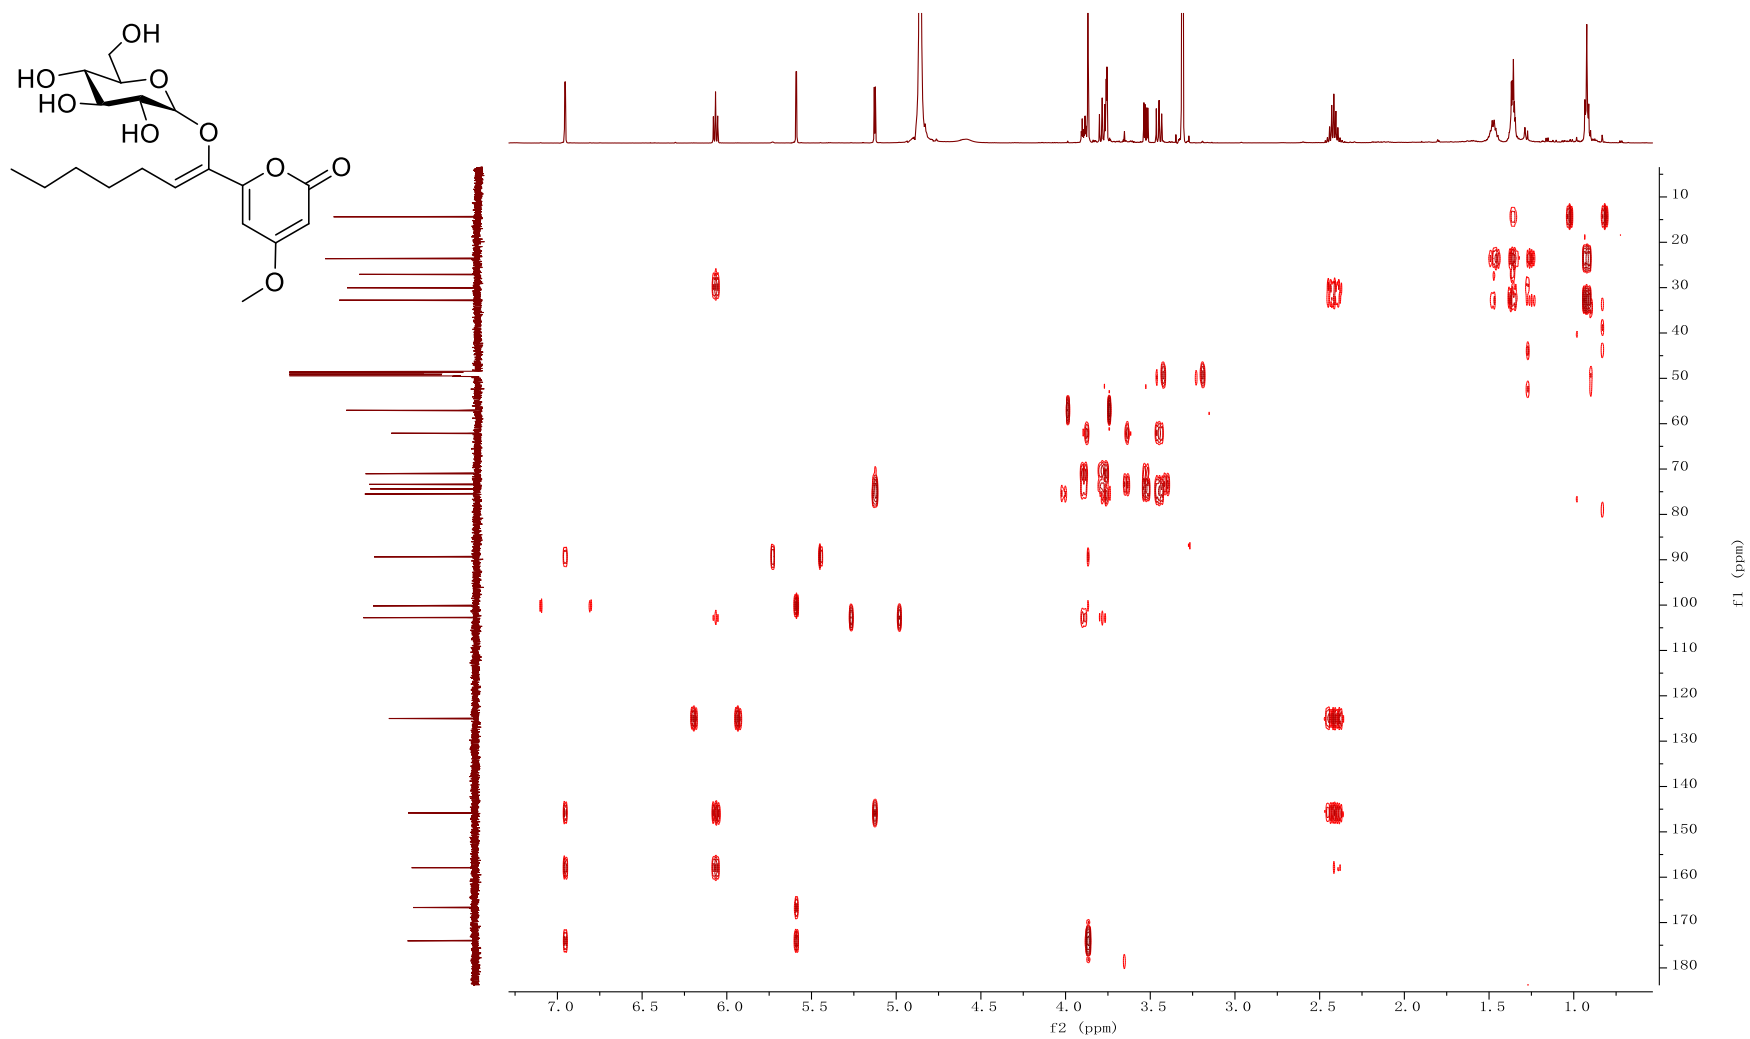

**Fig. S19** HMBC spectrum of **2** in methanol- $d_4$  (600 MHz).



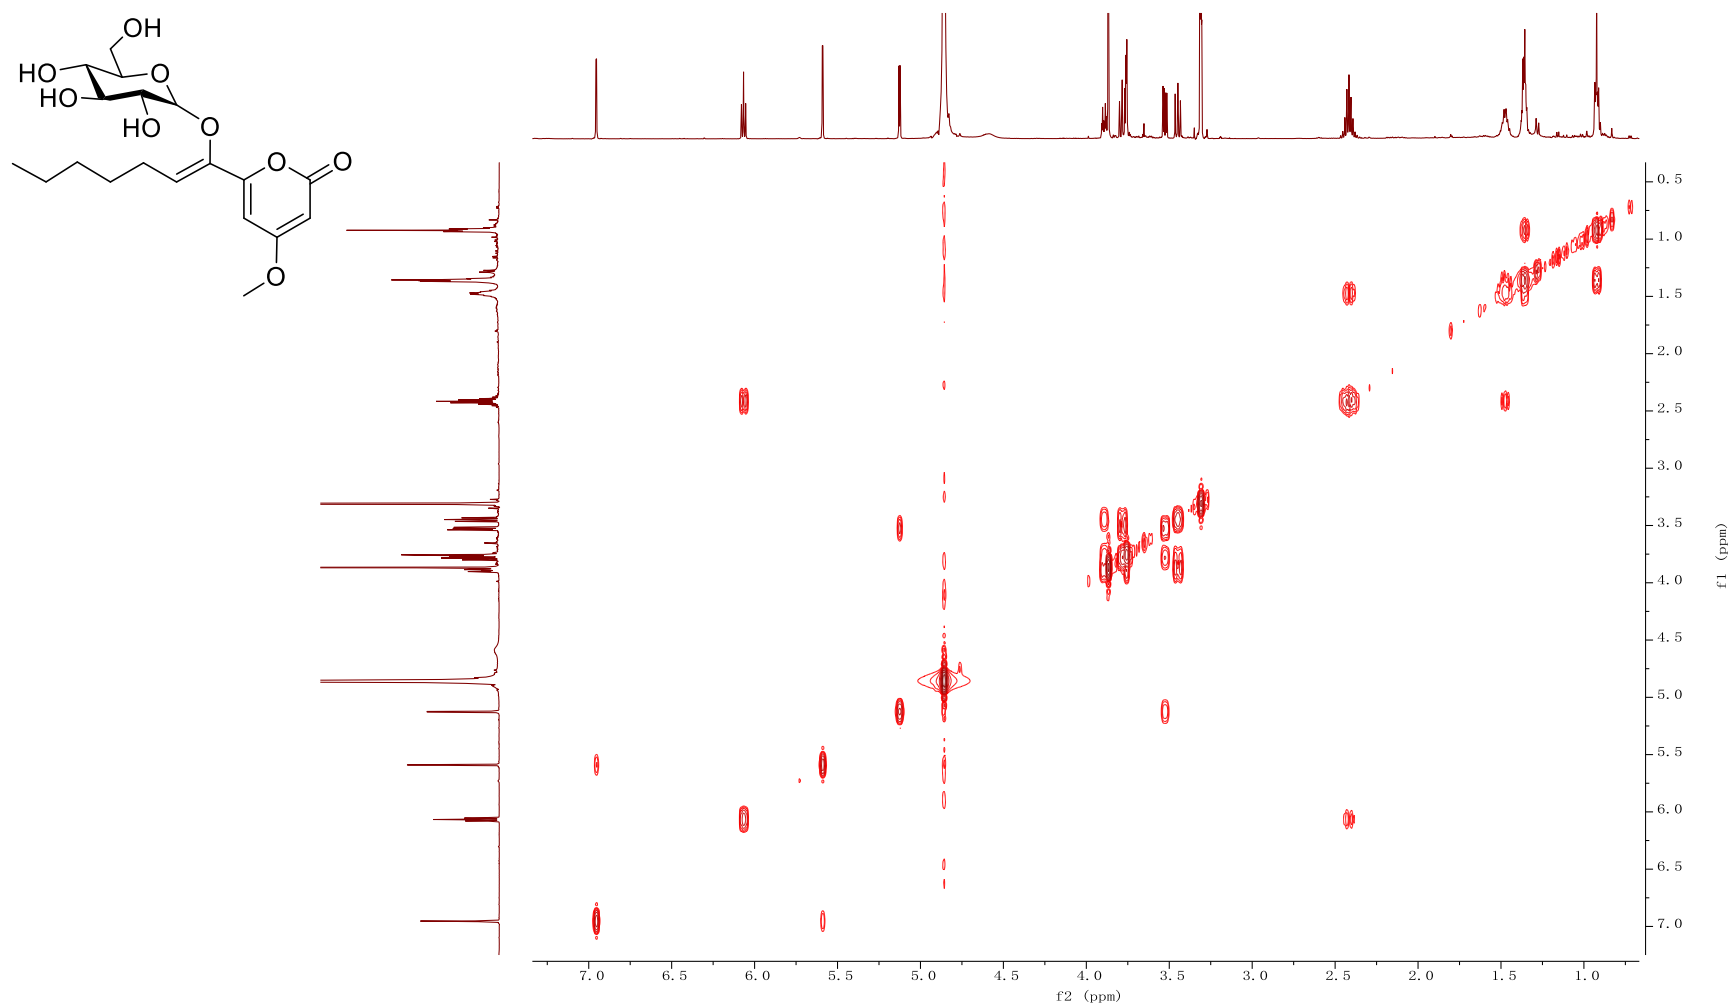

**Fig. S20**  $^1\text{H}$ - $^1\text{H}$  COSY spectrum of **2** in methanol- $d_4$  (600 MHz).

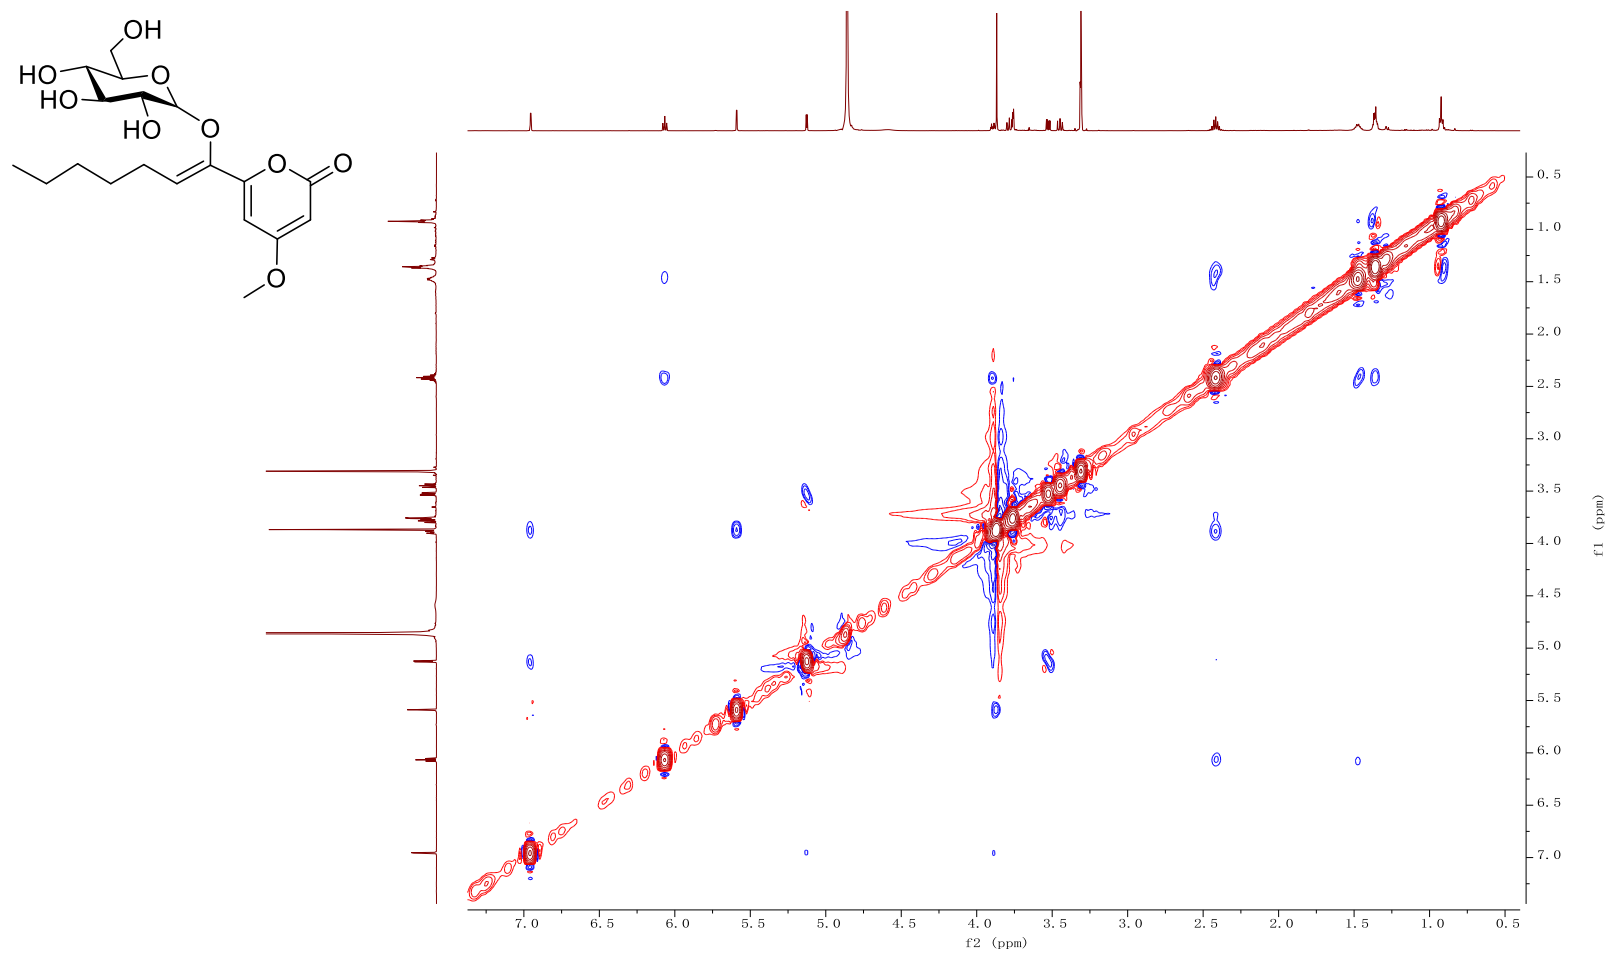

**Fig. S21** ROESY spectrum of **2** in methanol-*d*<sub>4</sub> (600 MHz).

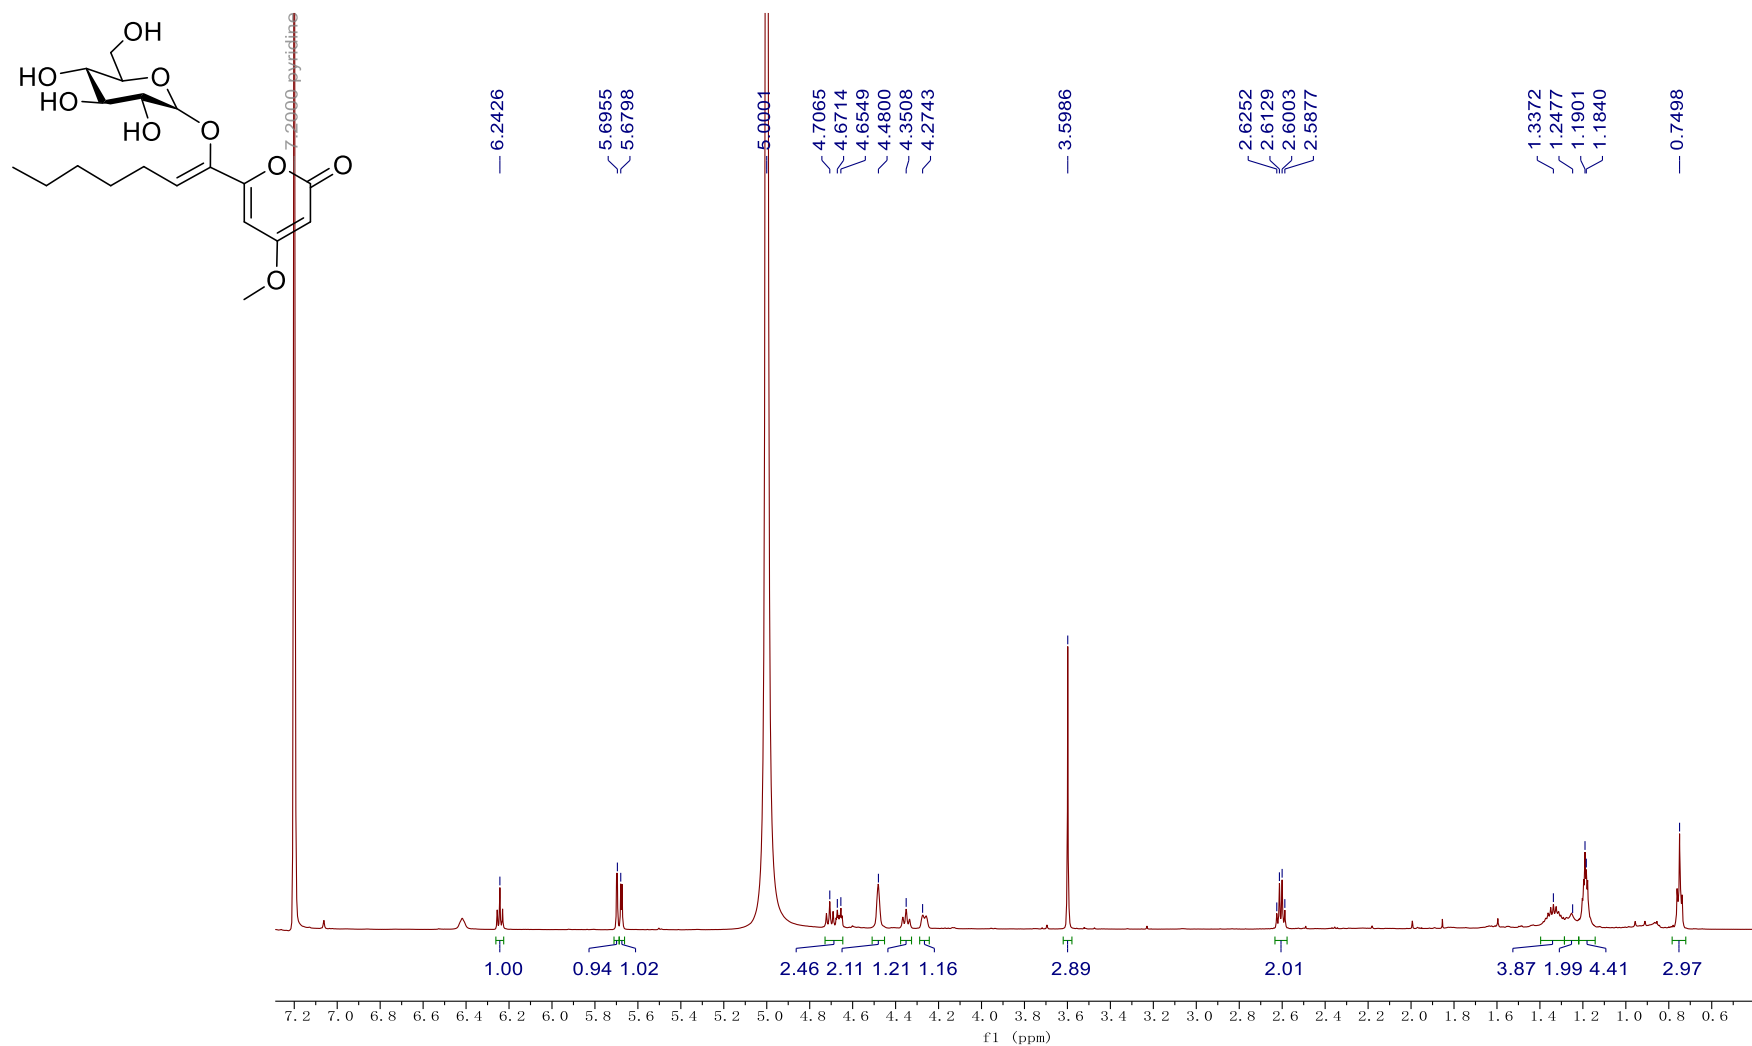

**Fig. S22**  $^1\text{H}$  NMR spectrum of **2** in  $\text{pyridine-}d_5$  (600 MHz).

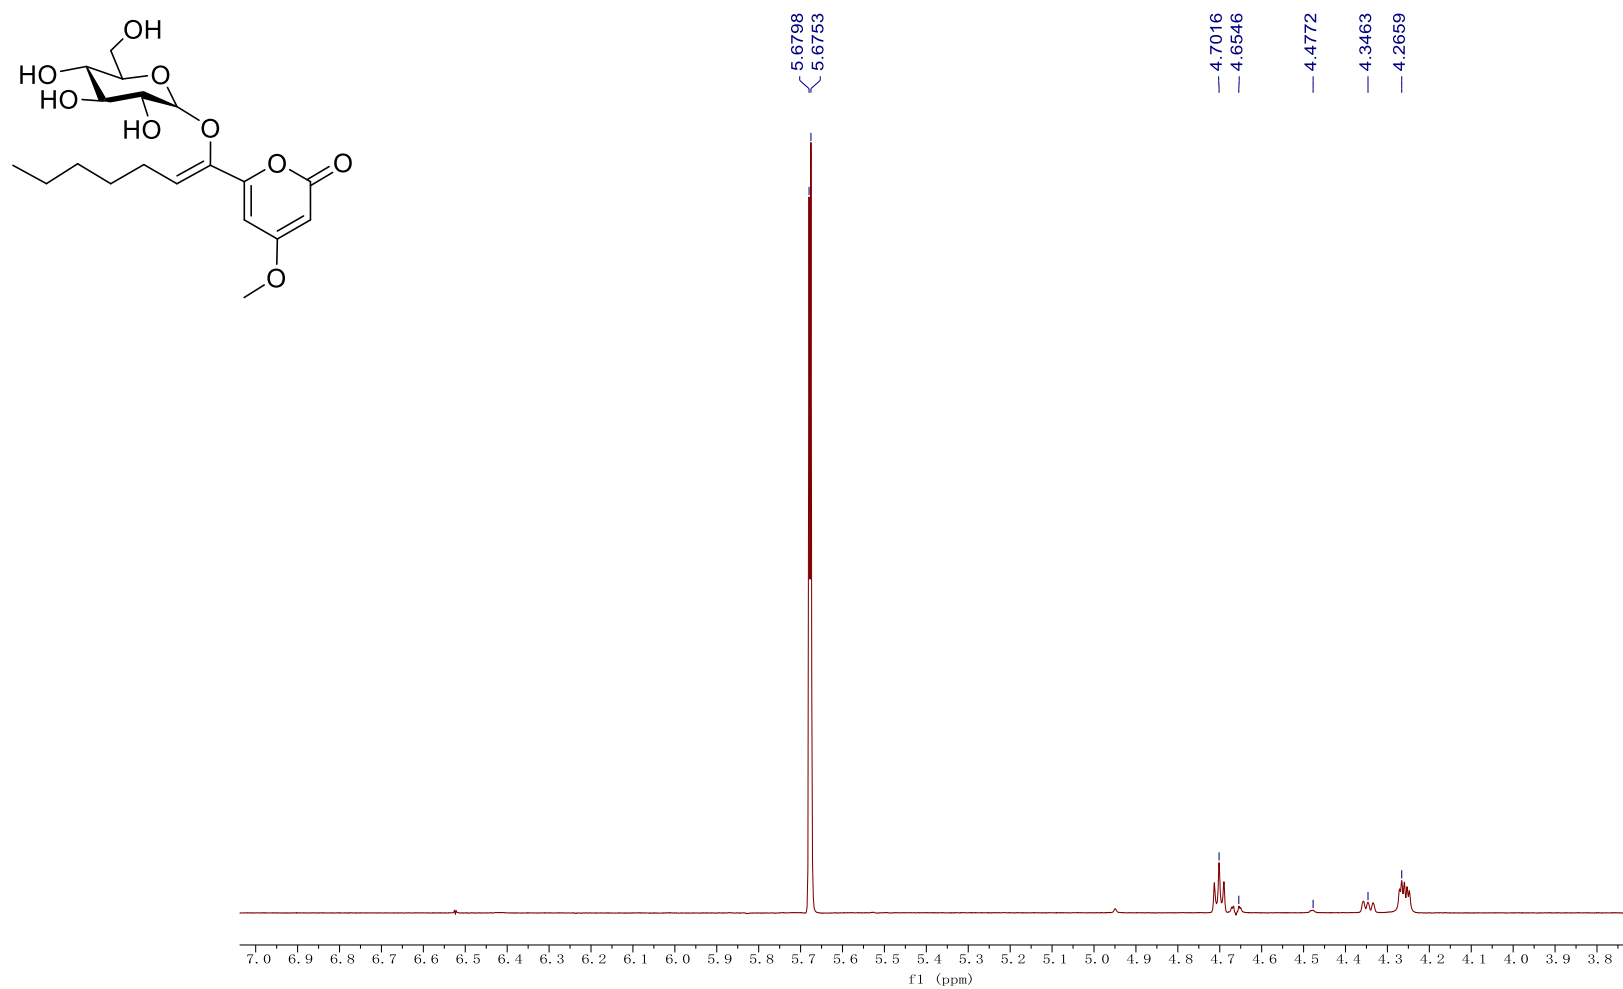

**Fig. S23** 1D-TOCSY spectrum of **2** in pyridine- $d_5$  (800 MHz).

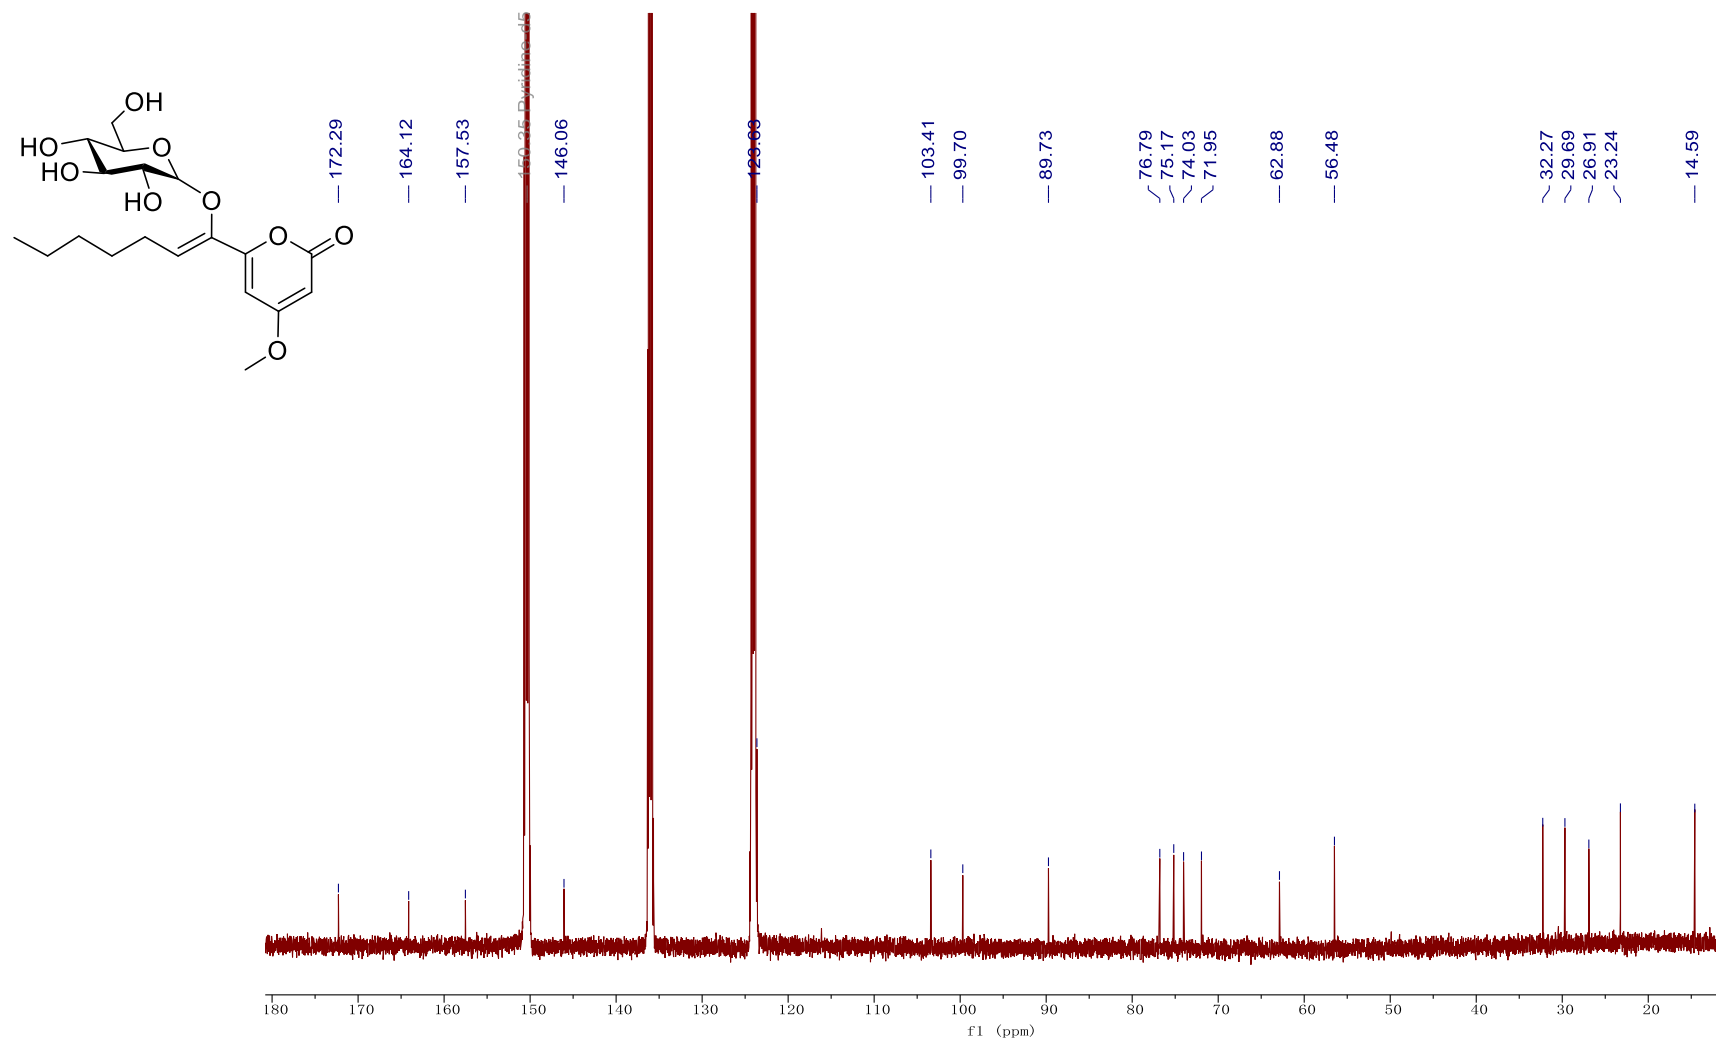

**Fig. S24**  $^{13}\text{C}$  NMR spectrum of **2** in pyridine- $d_5$  (150 MHz).

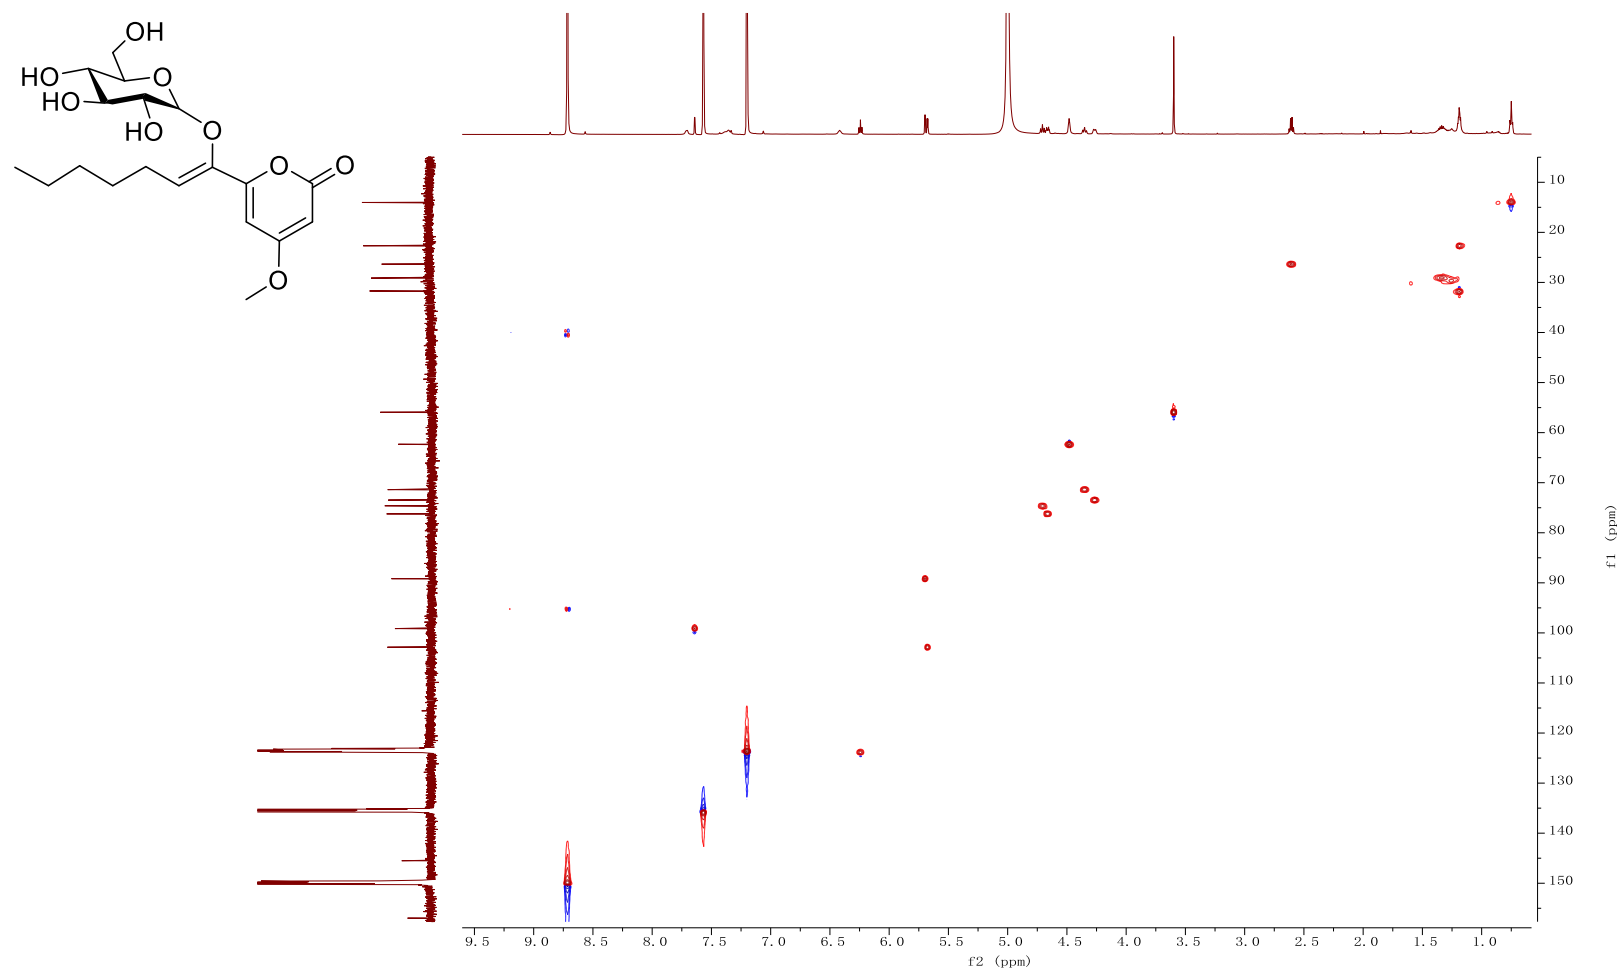

**Fig. S25** HSQC spectrum of **2** in pyridine- $d_5$  (600 MHz).

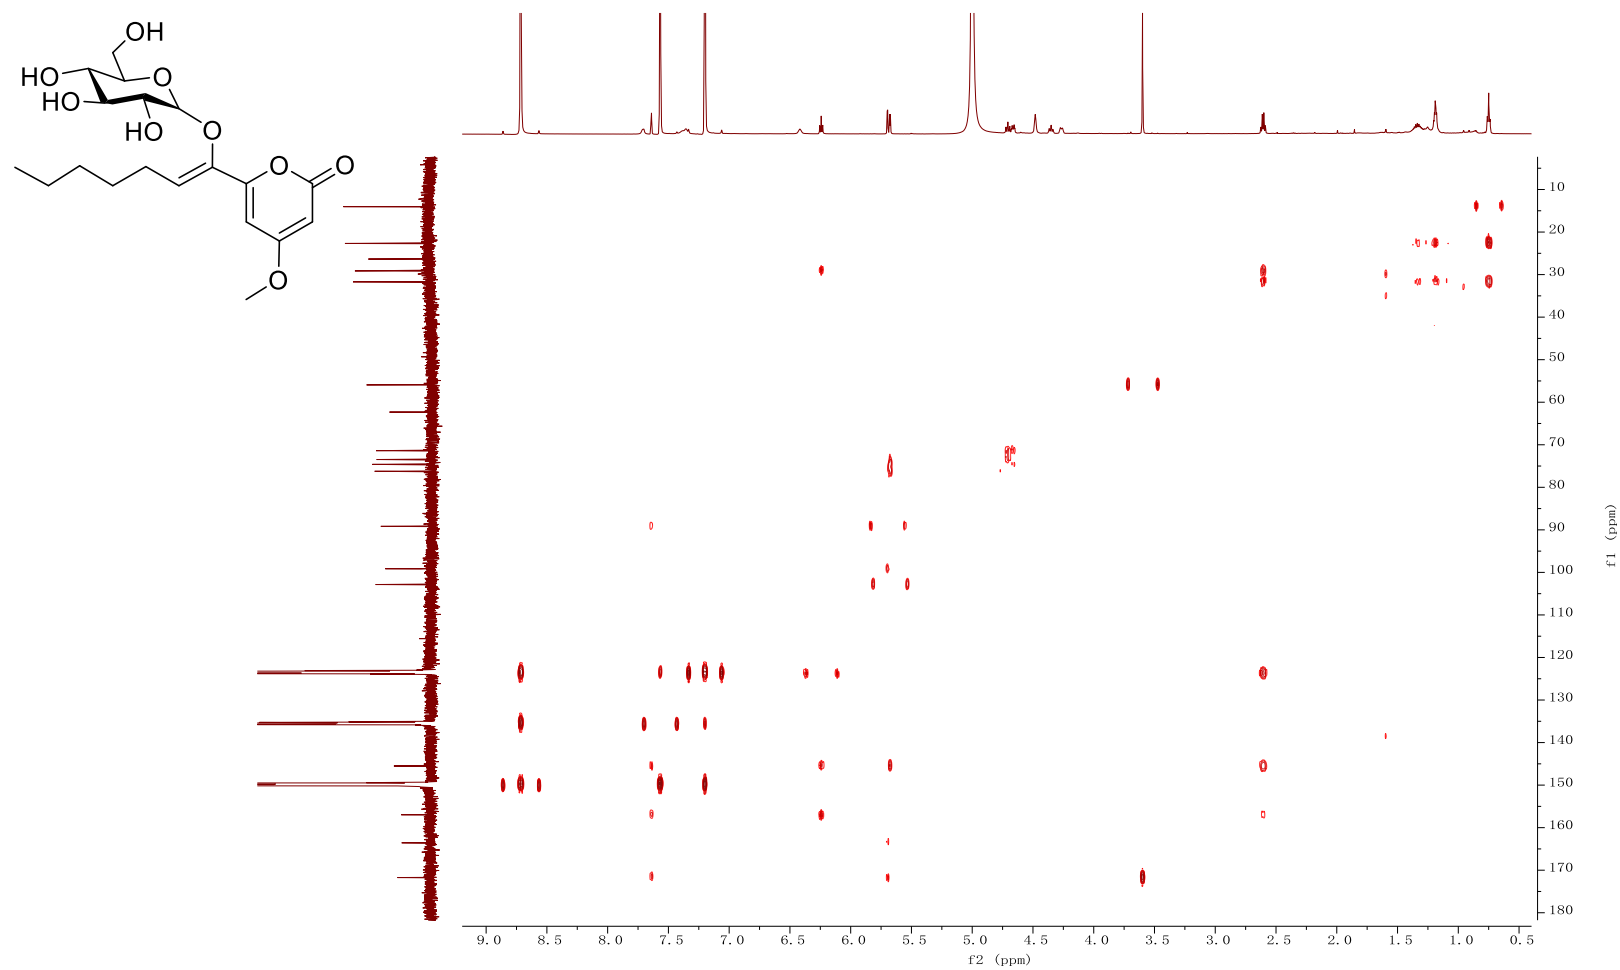

**Fig. S26** HMBC spectrum of **2** in pyridine-*d*<sub>5</sub> (600 MHz).

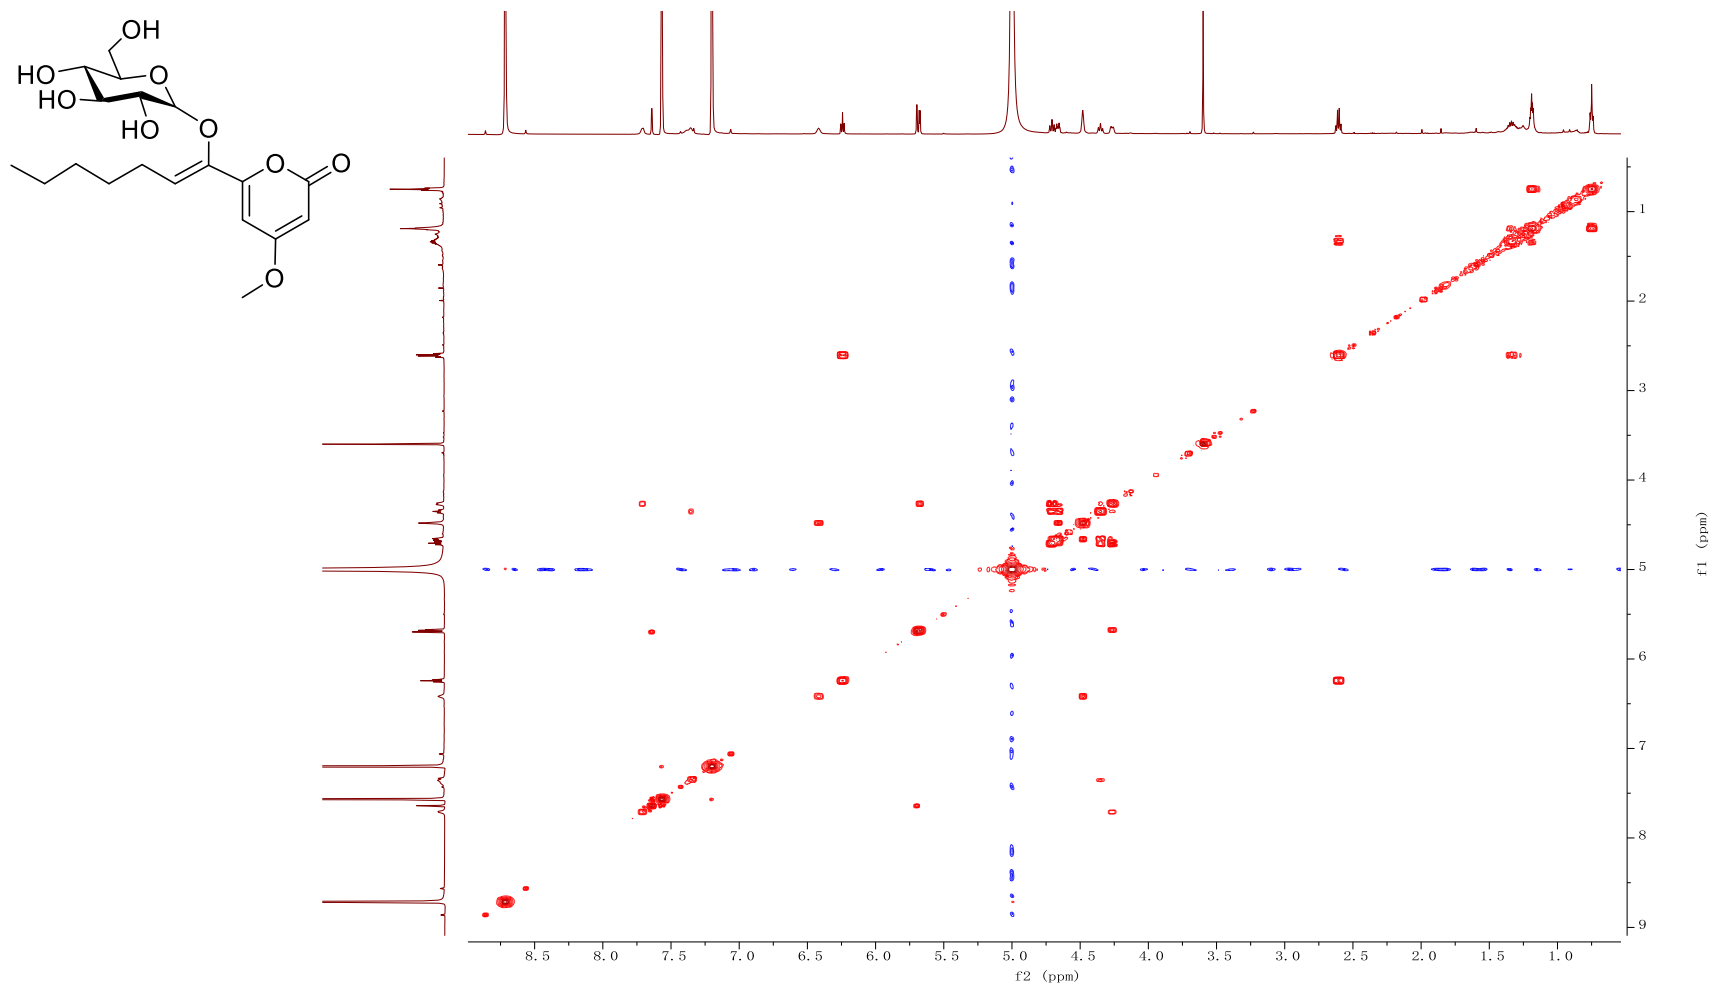

**Fig. S27**  $^1\text{H}$ - $^1\text{H}$  COSY spectrum of **2** in  $\text{pyridine-}d_5$  (600 MHz).



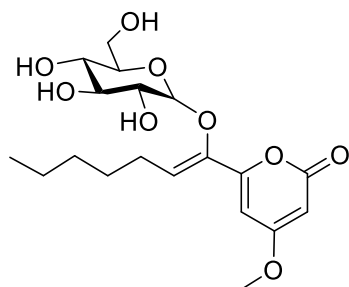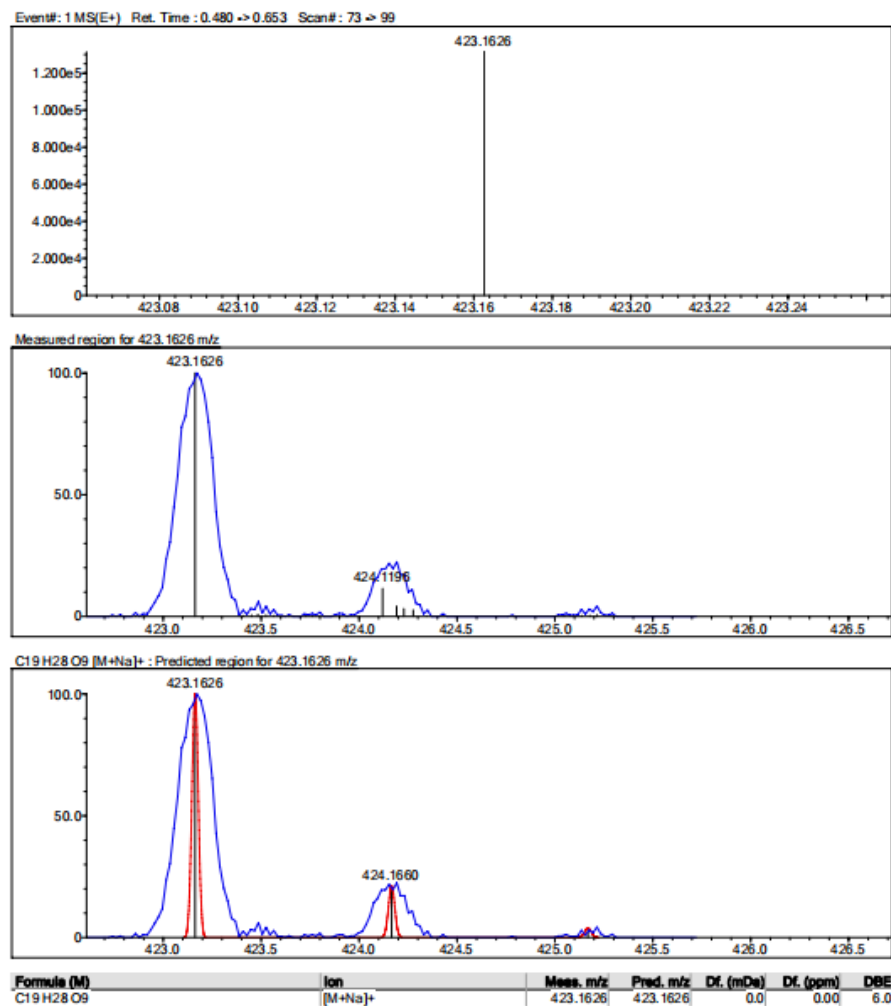

Fig. S28 HRESIMS spectrum of 2.

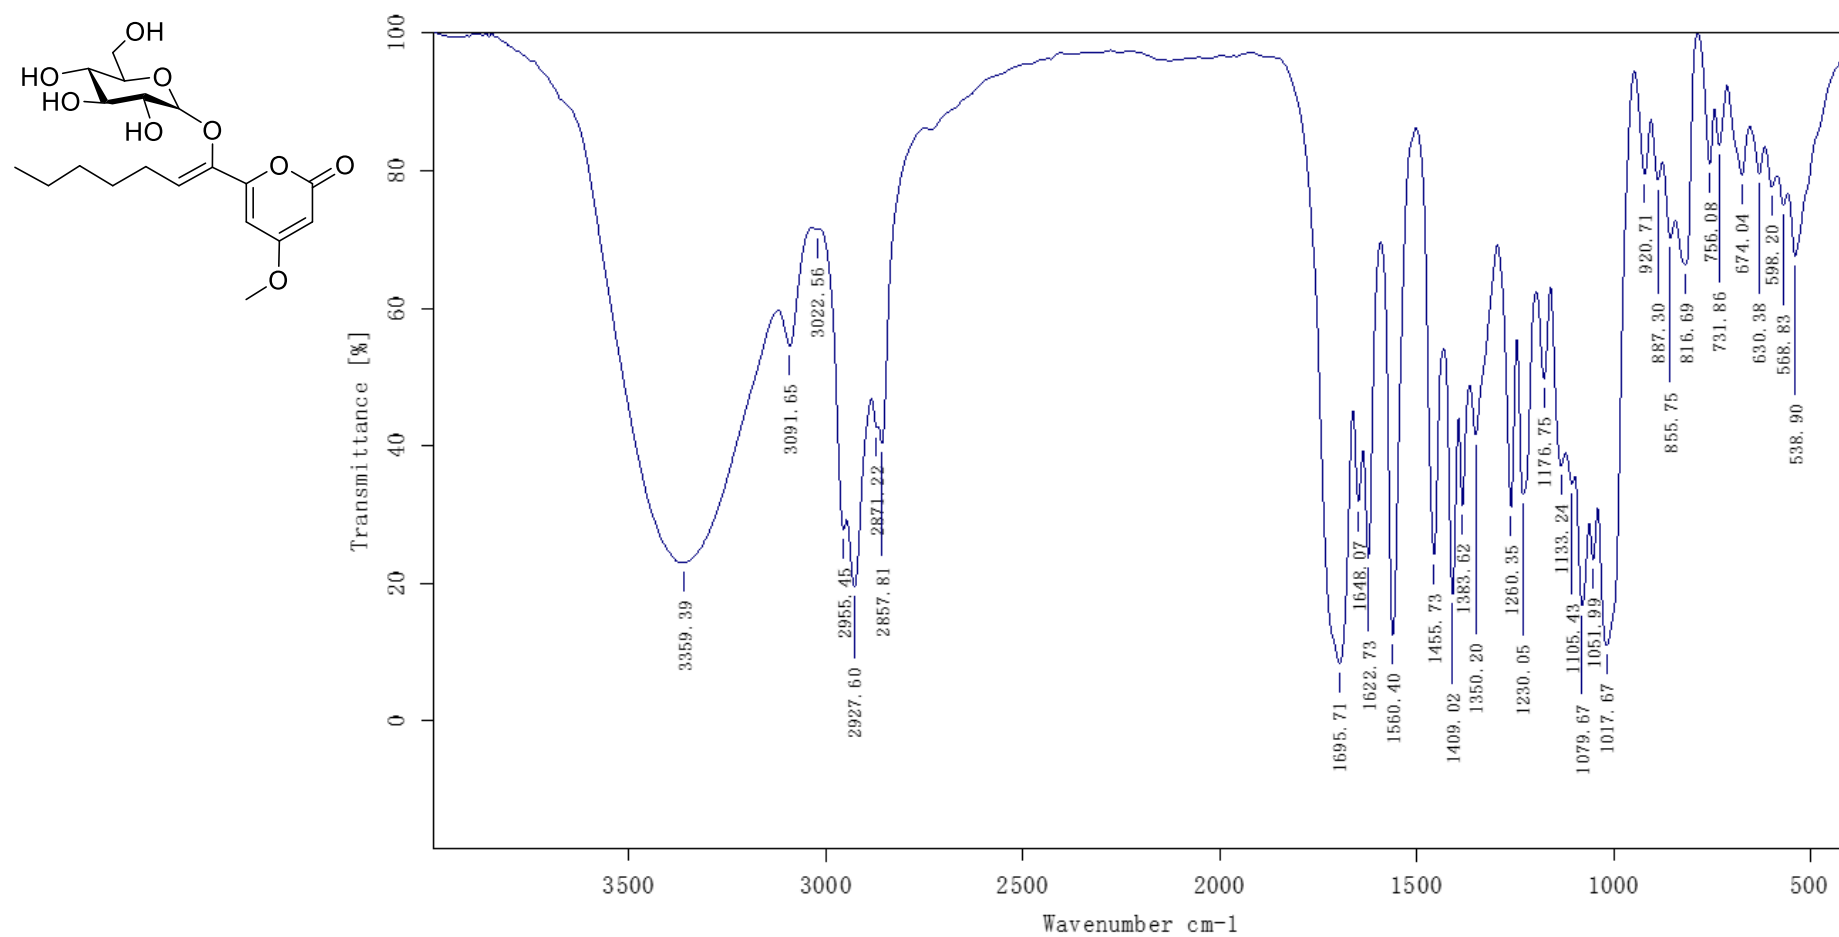

Fig. S29 IR spectrum of 2.

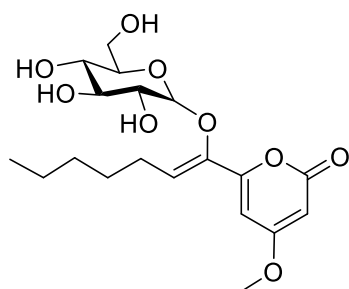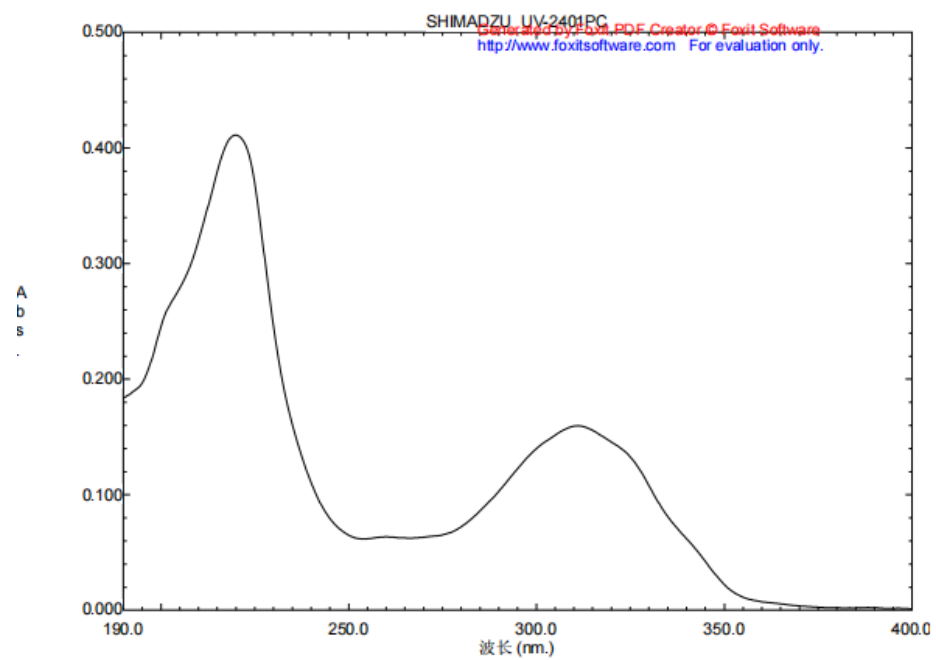

**Fig. S30** UV spectrum of **2**.

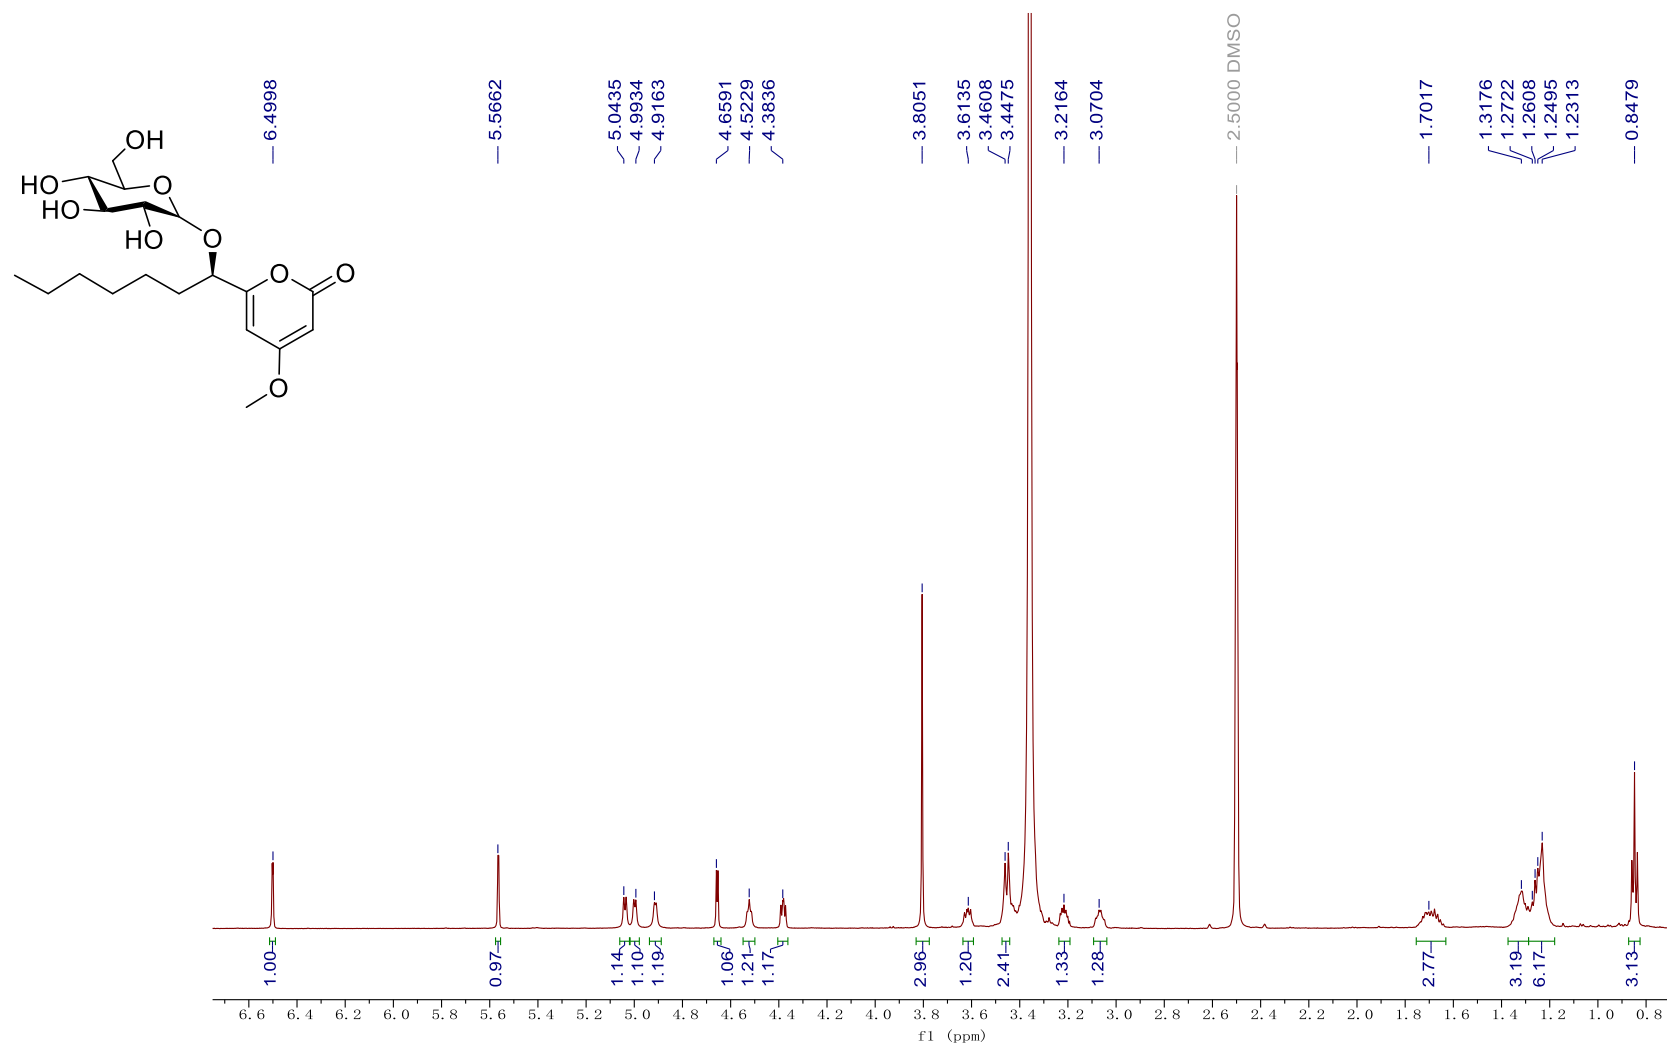

**Fig. S31** <sup>1</sup>H NMR spectrum of **3** in DMSO-*d*<sub>6</sub> (600 MHz).

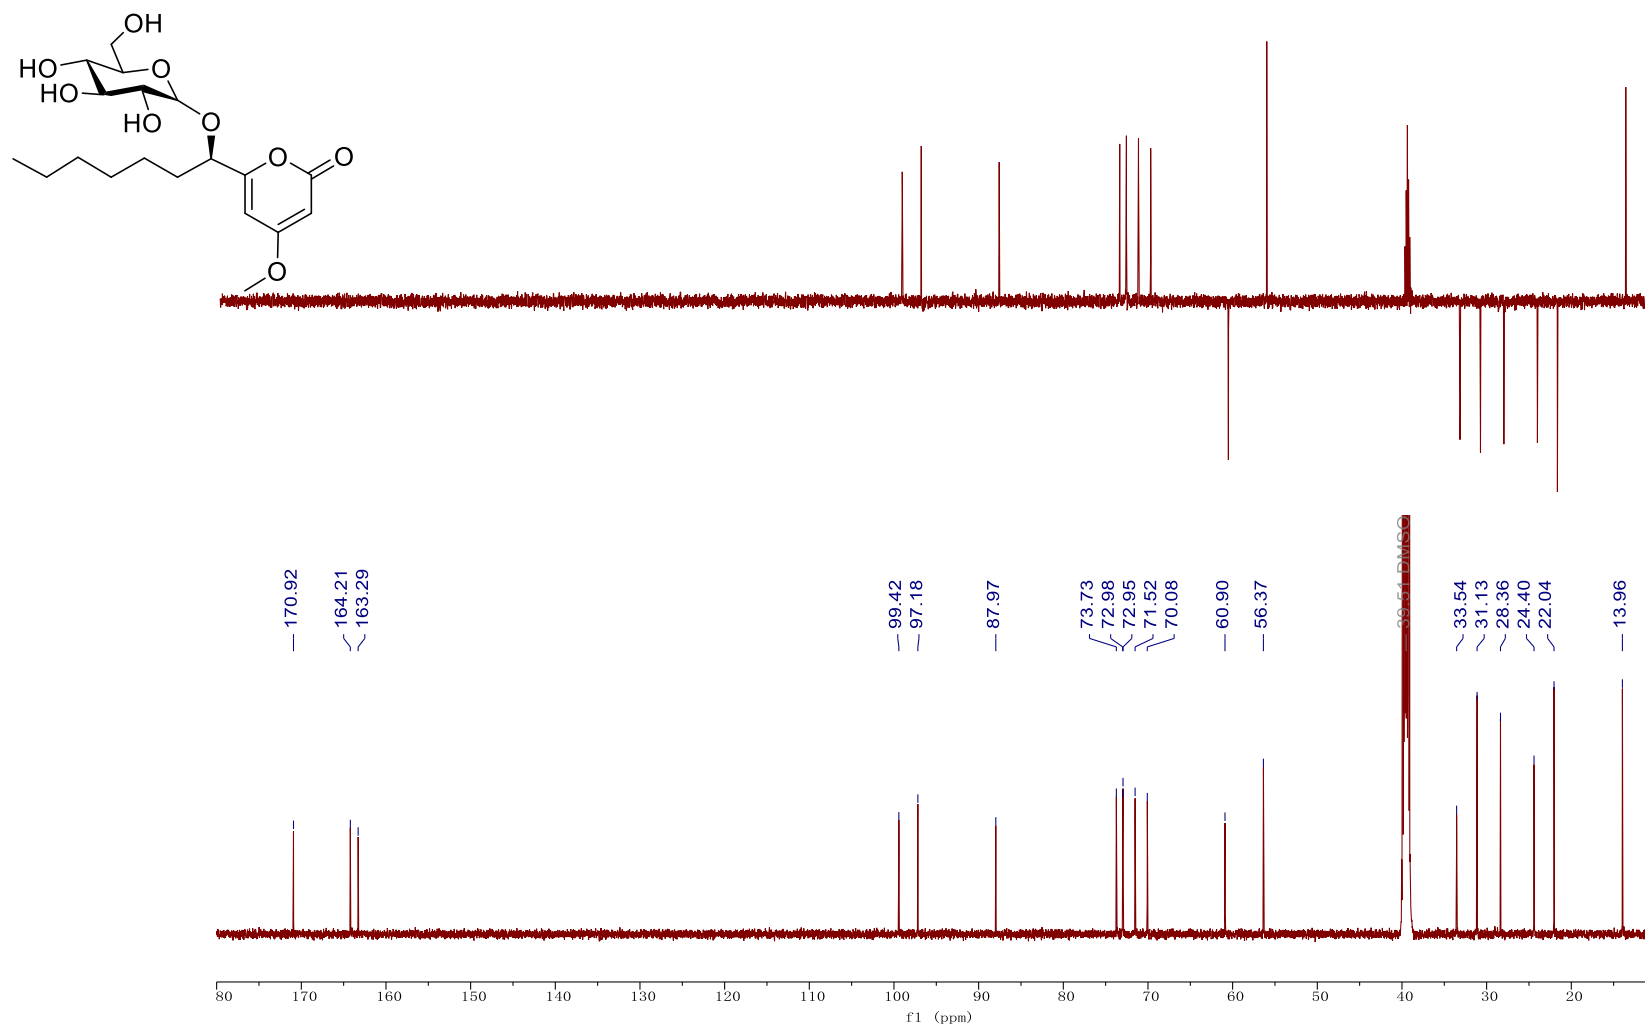

**Fig. S32** <sup>13</sup>C NMR spectrum of **3** in DMSO-*d*<sub>6</sub> (600 MHz).

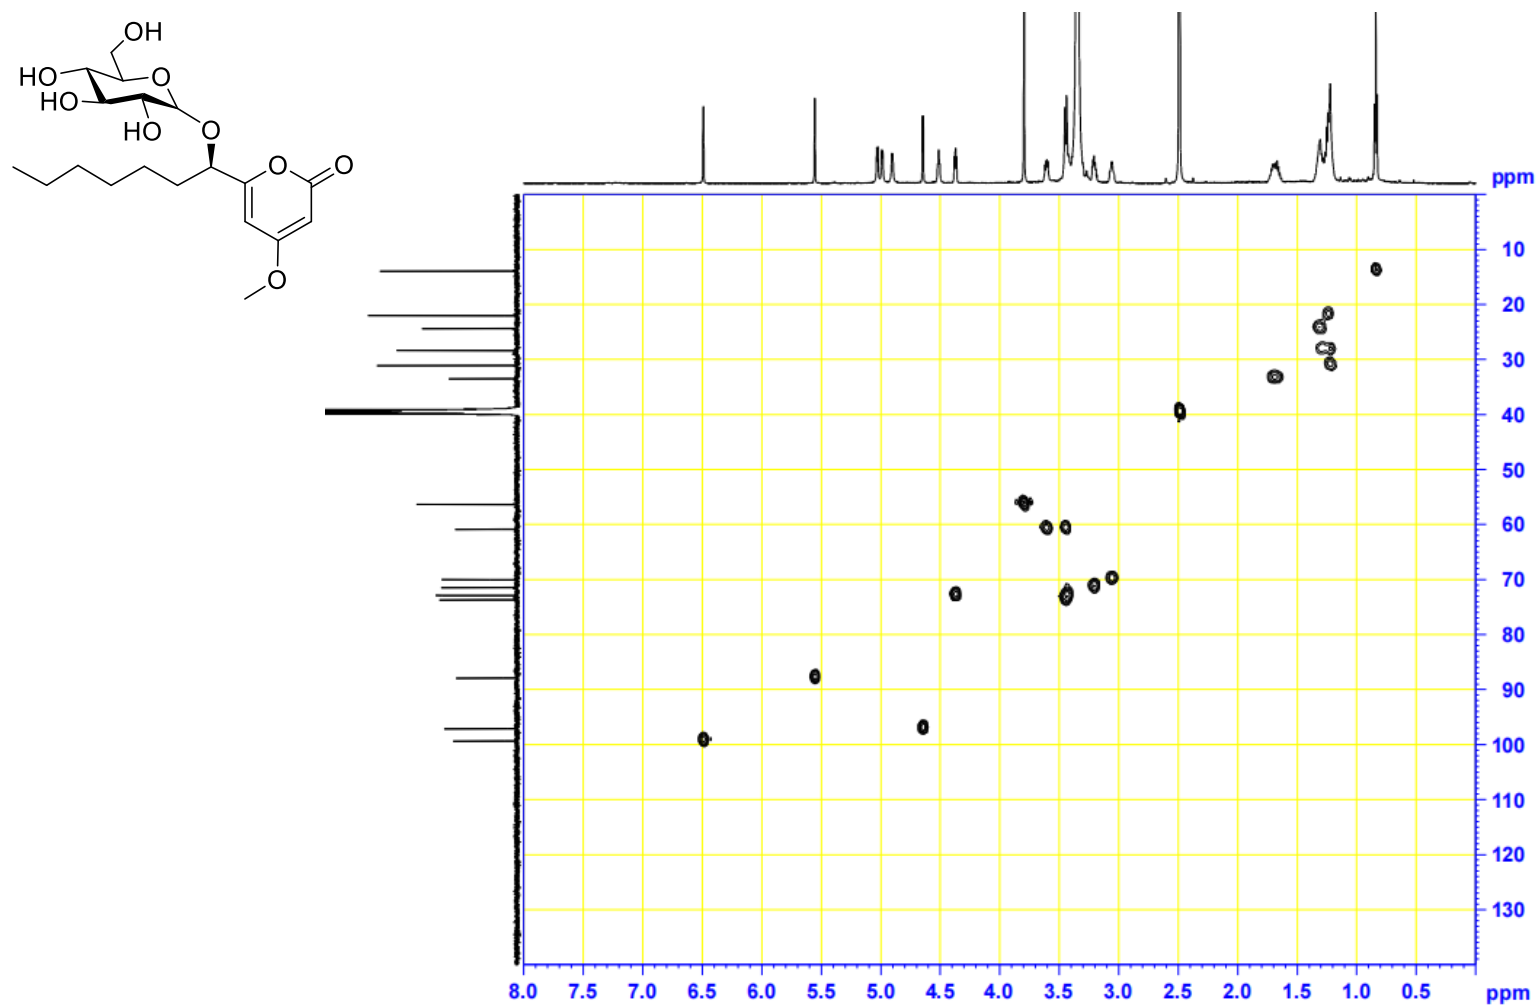

Fig. S33 HSQC spectrum of **3** in  $\text{DMSO}-d_6$  (600 MHz).

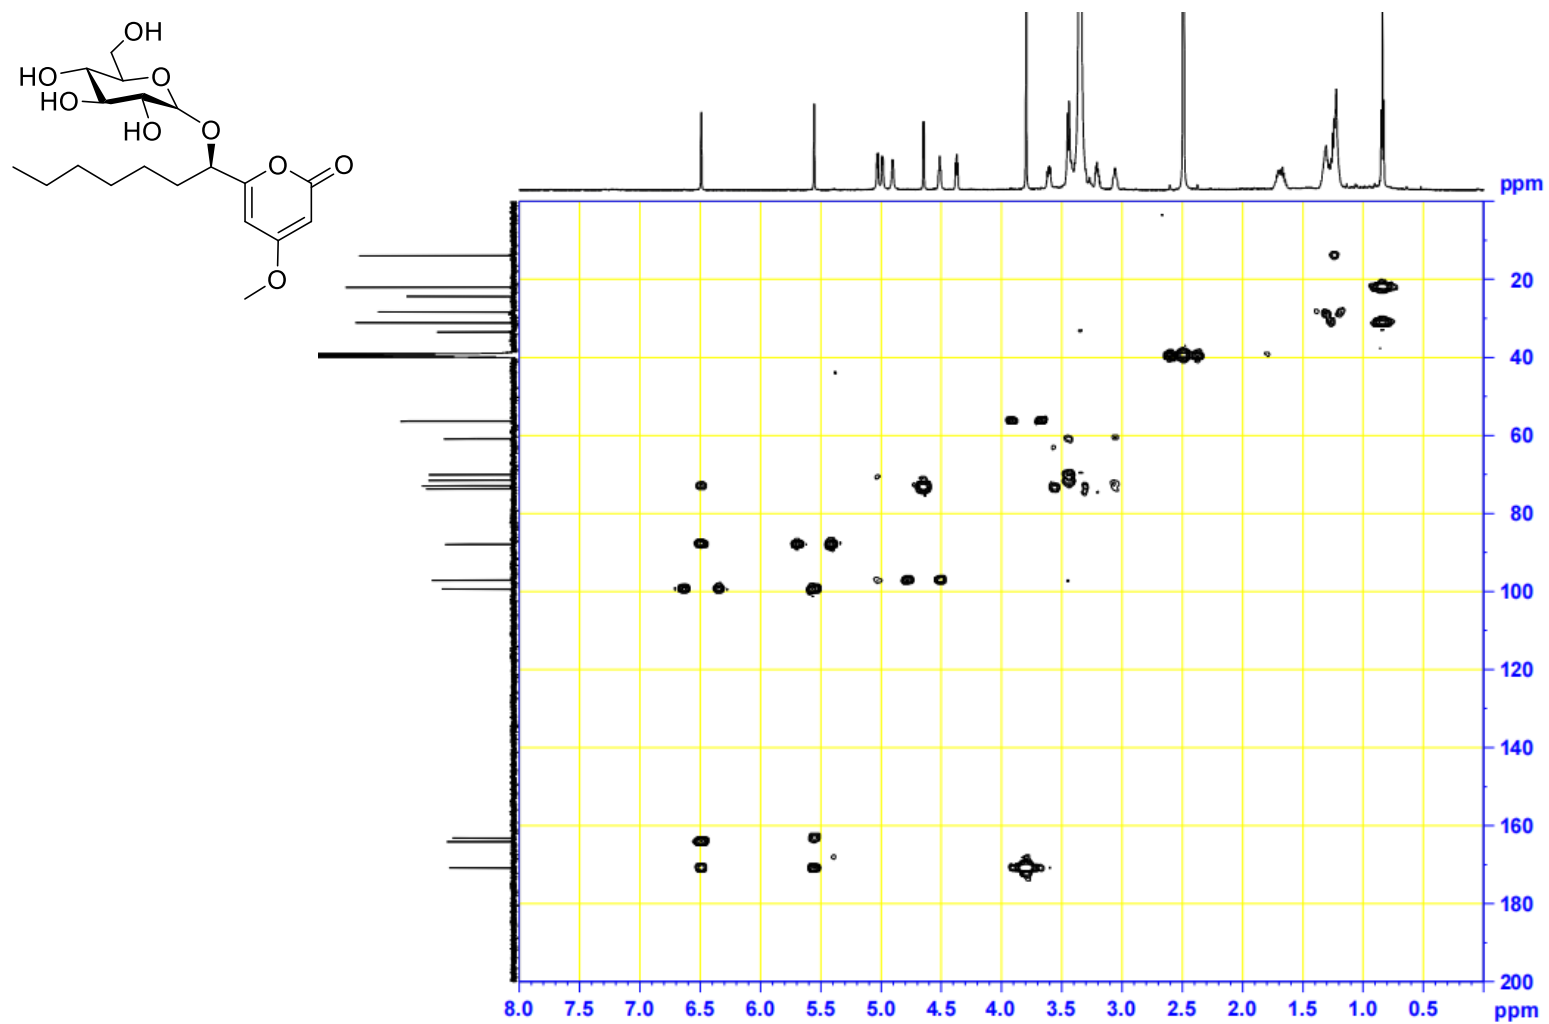

Fig. S34 HMBC spectrum of **3** in DMSO- $d_6$  (600 MHz).

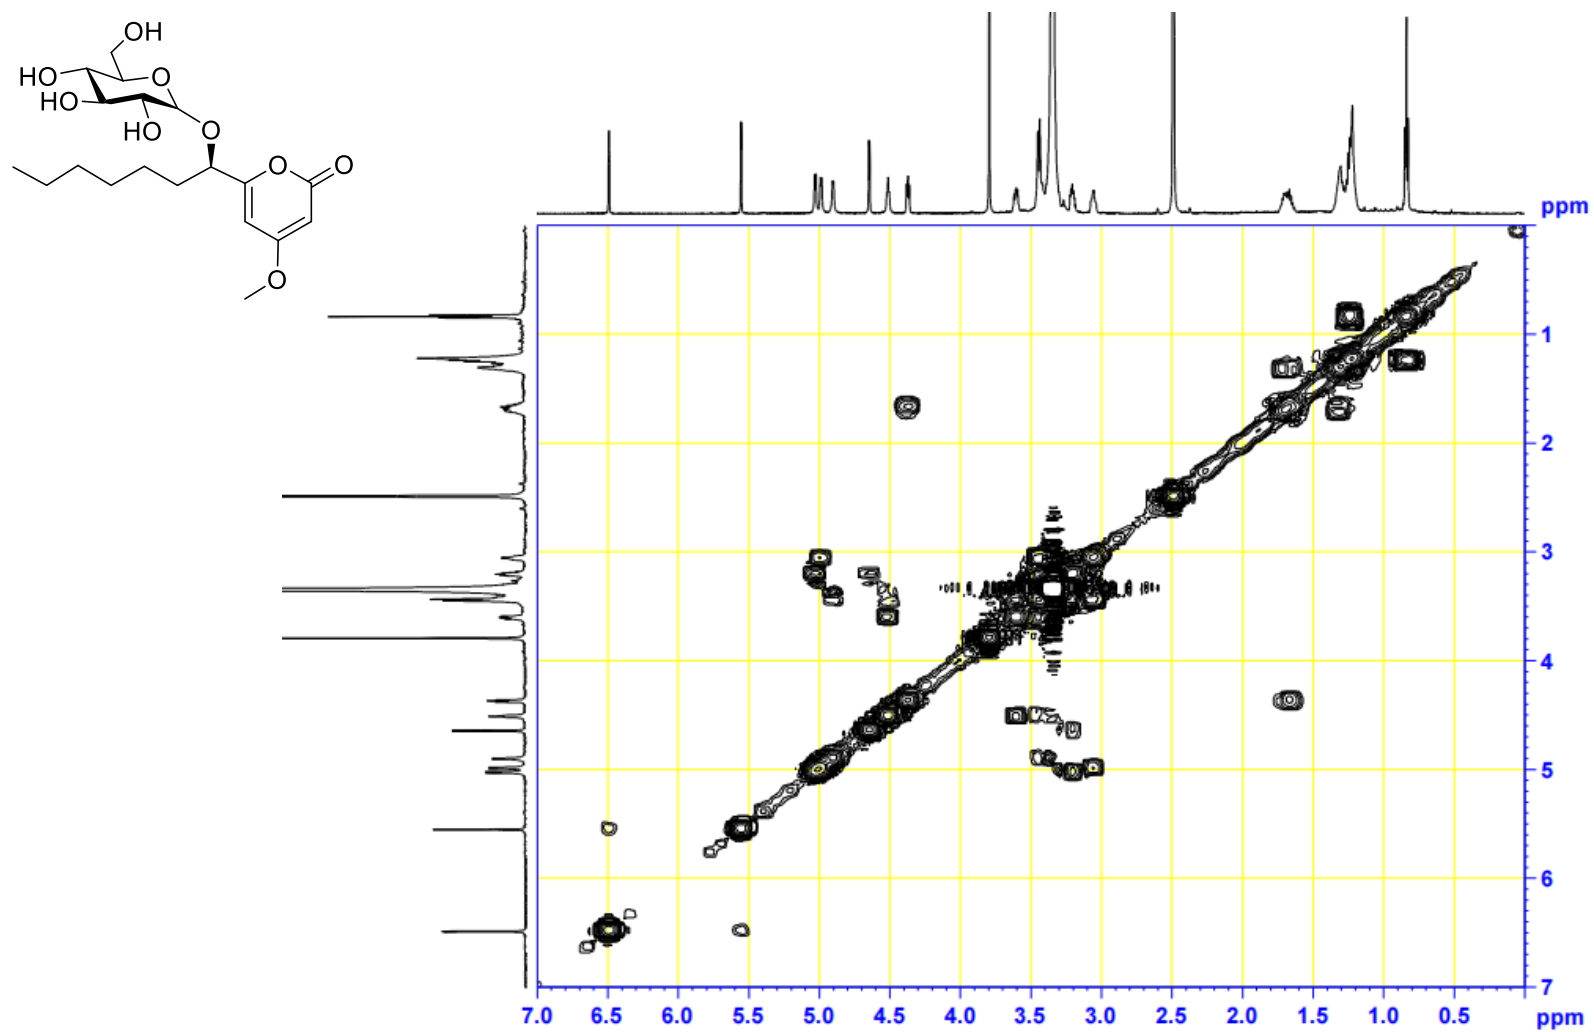

Fig. S35  $^1\text{H}$ - $^1\text{H}$  COSY spectrum of **3** in  $\text{DMSO}-d_6$  (600 MHz).



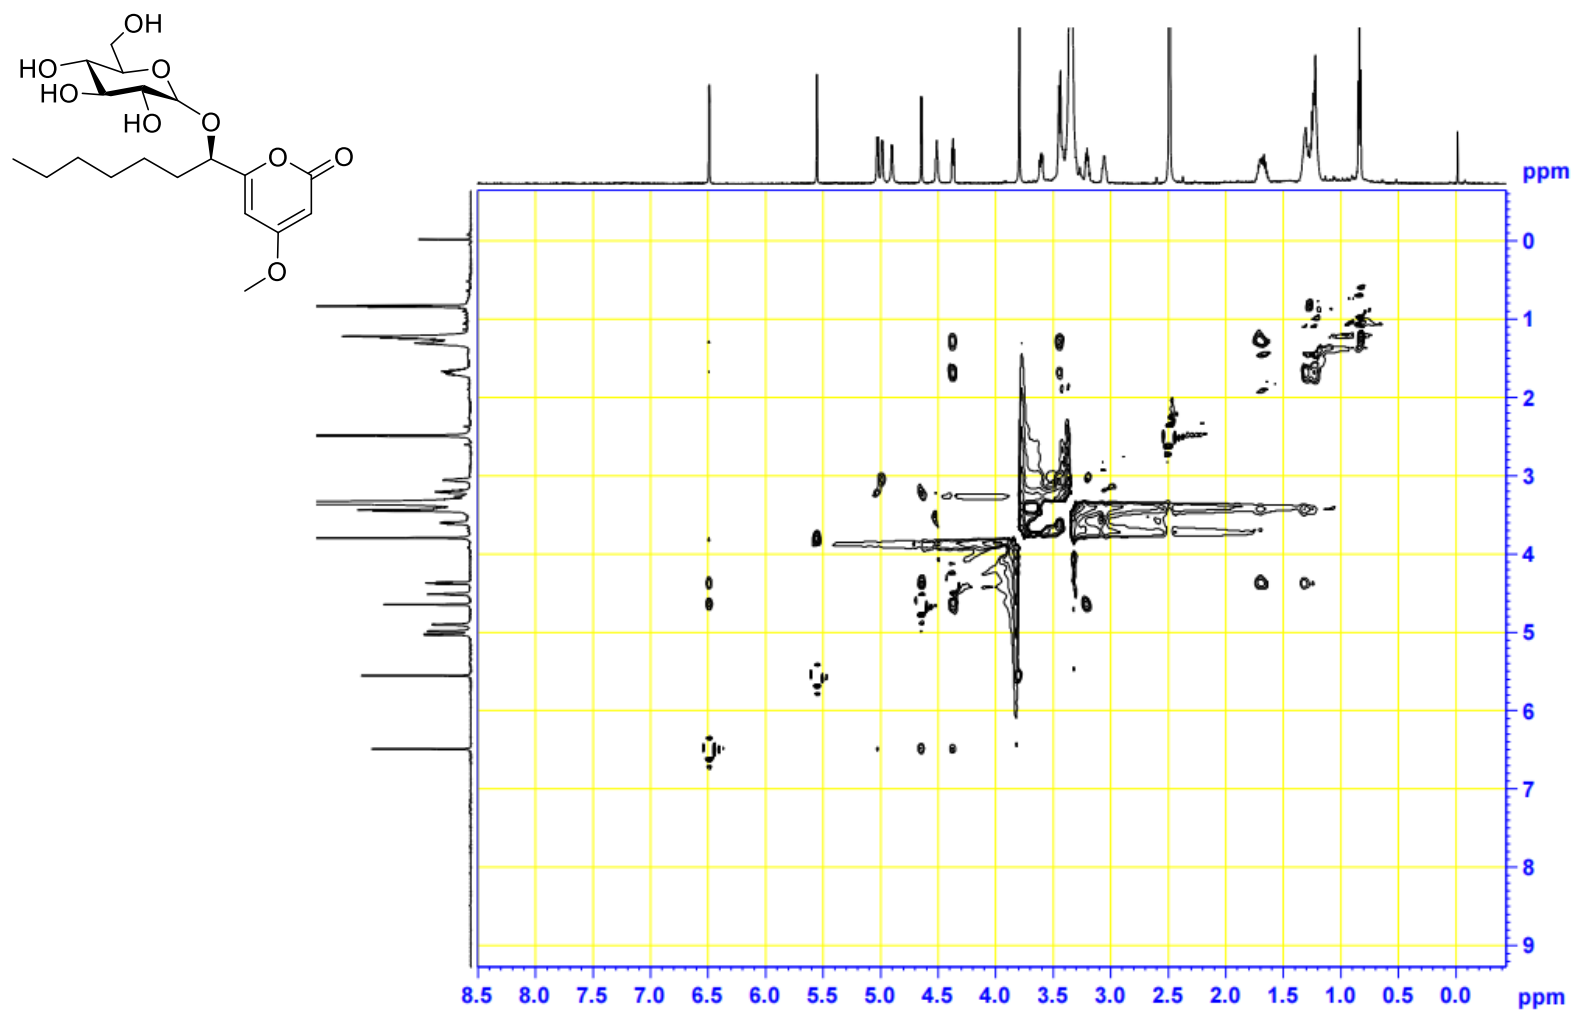

**Fig. S36** ROESY spectrum of **3** in DMSO-*d*<sub>6</sub> (600 MHz).

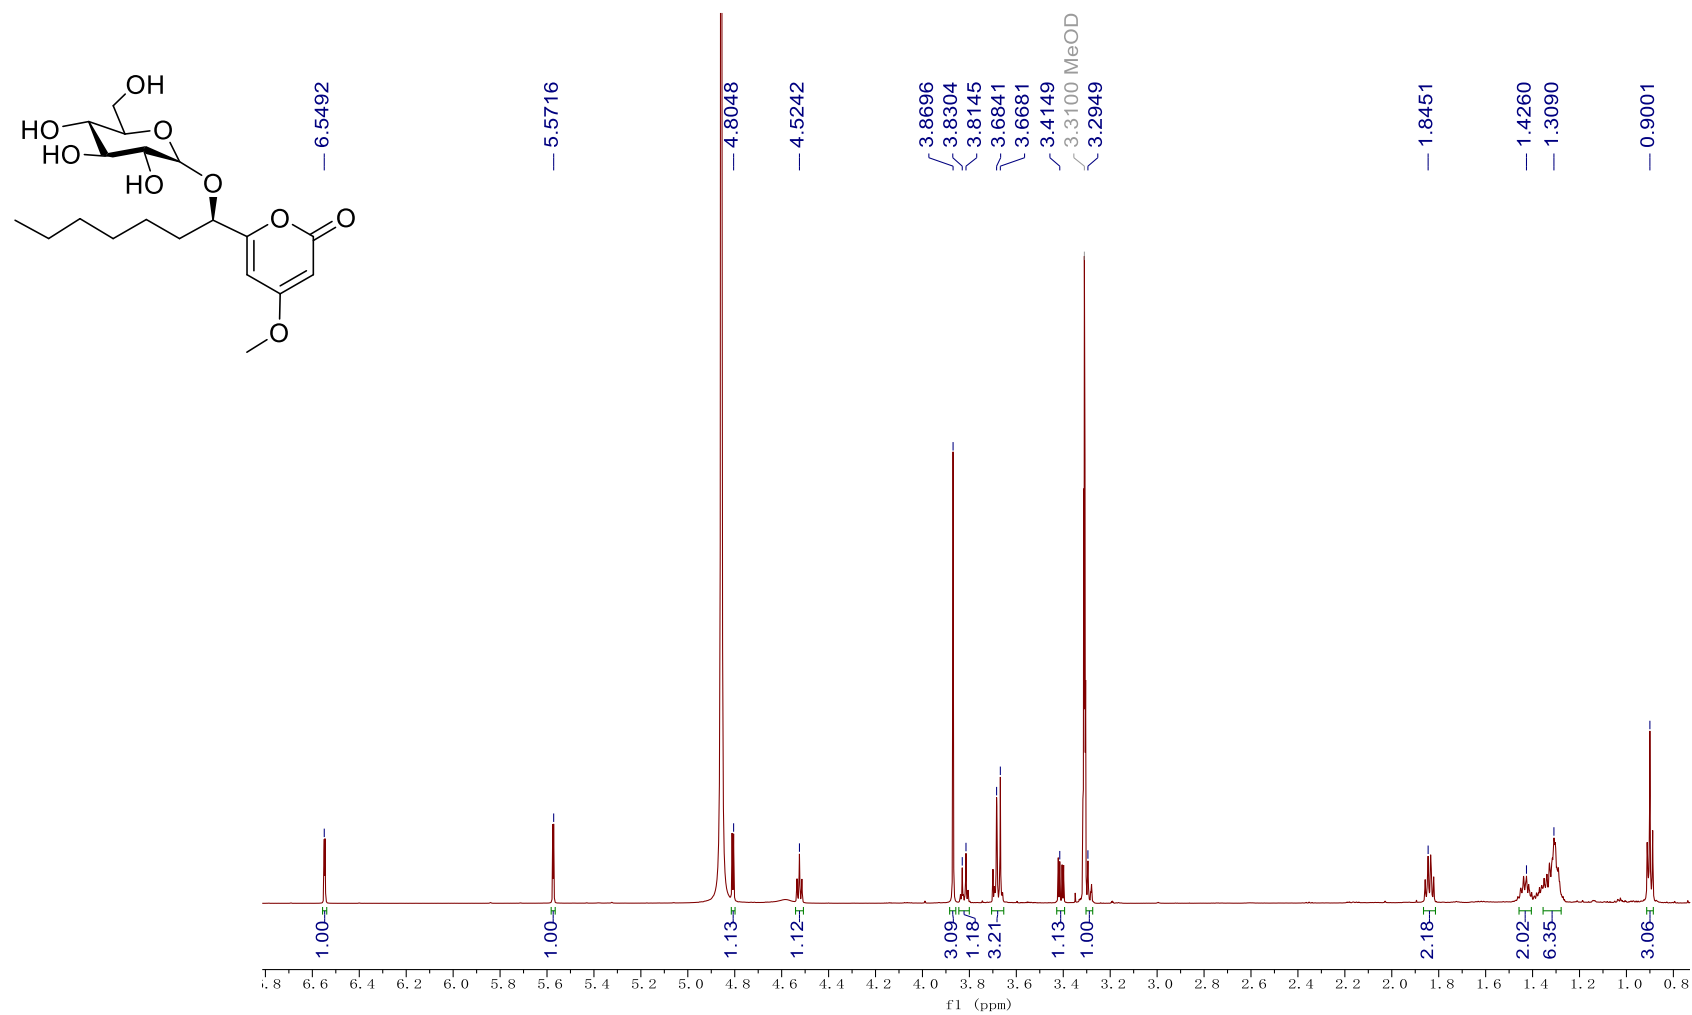

**Fig. S37**  $^1\text{H}$  NMR Spectrum of **3** in methanol- $d_4$  (600 MHz)

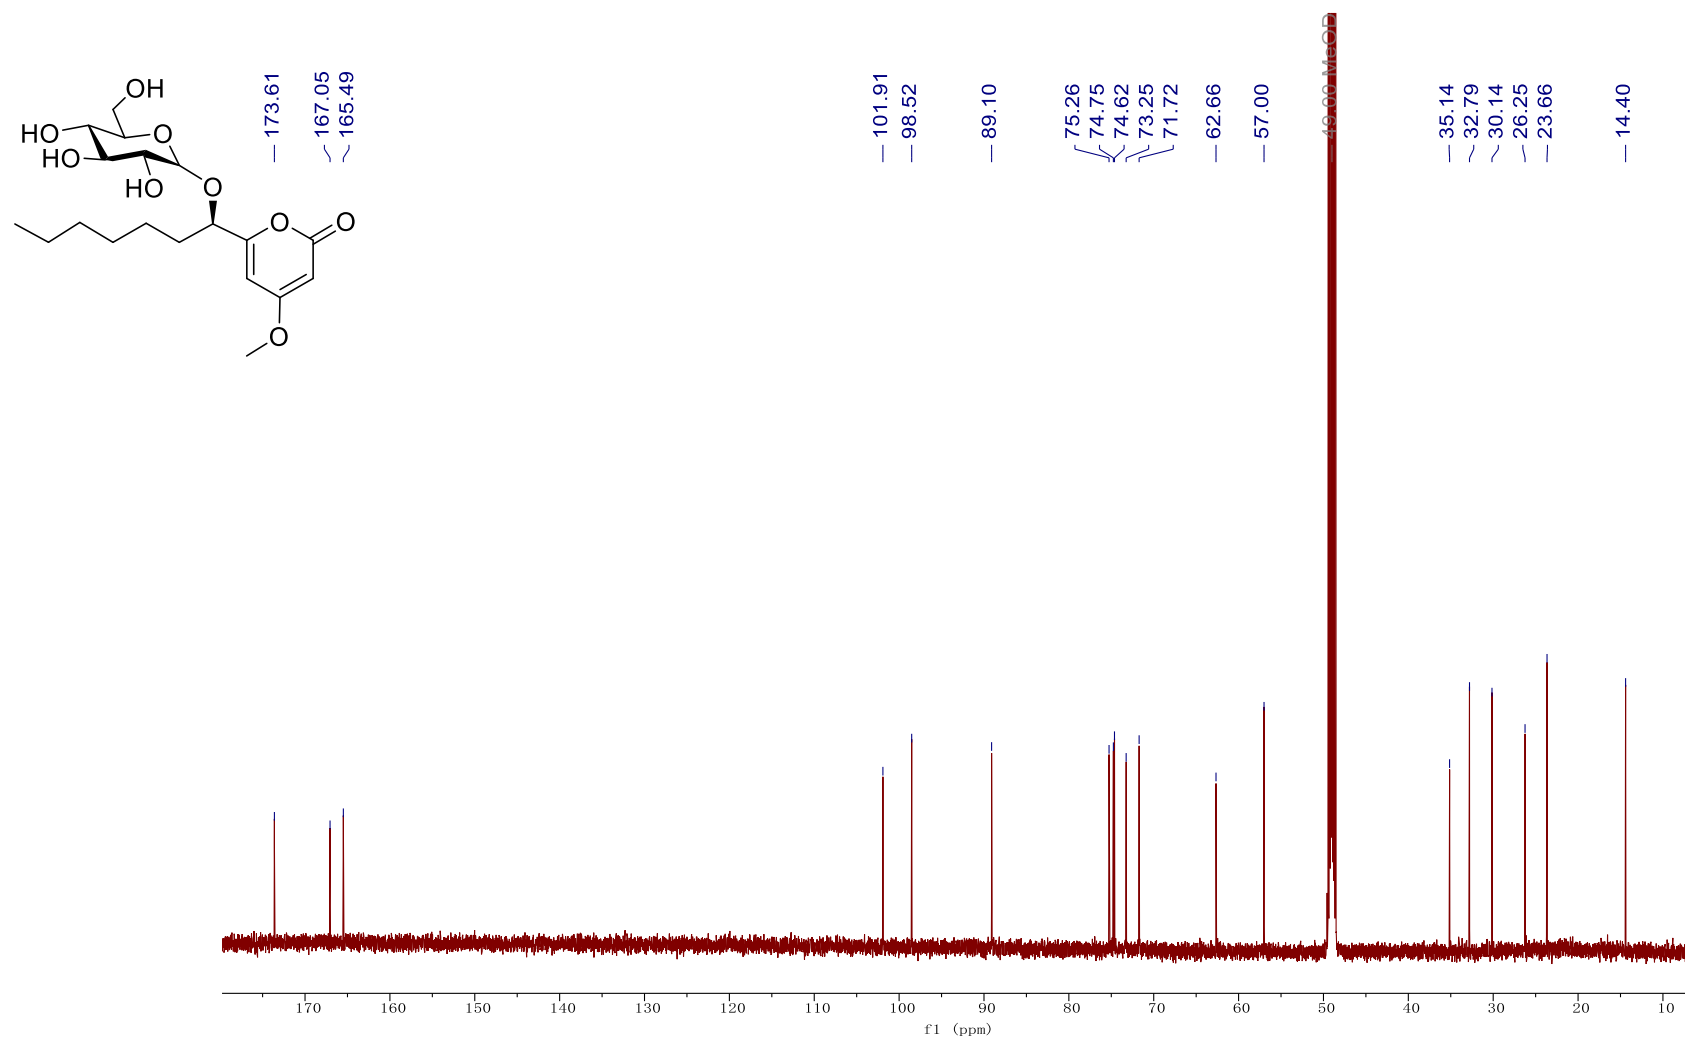

**Fig. S38**  $^{13}\text{C}$  NMR spectrum of **3** in methanol- $d_4$  (600 MHz).

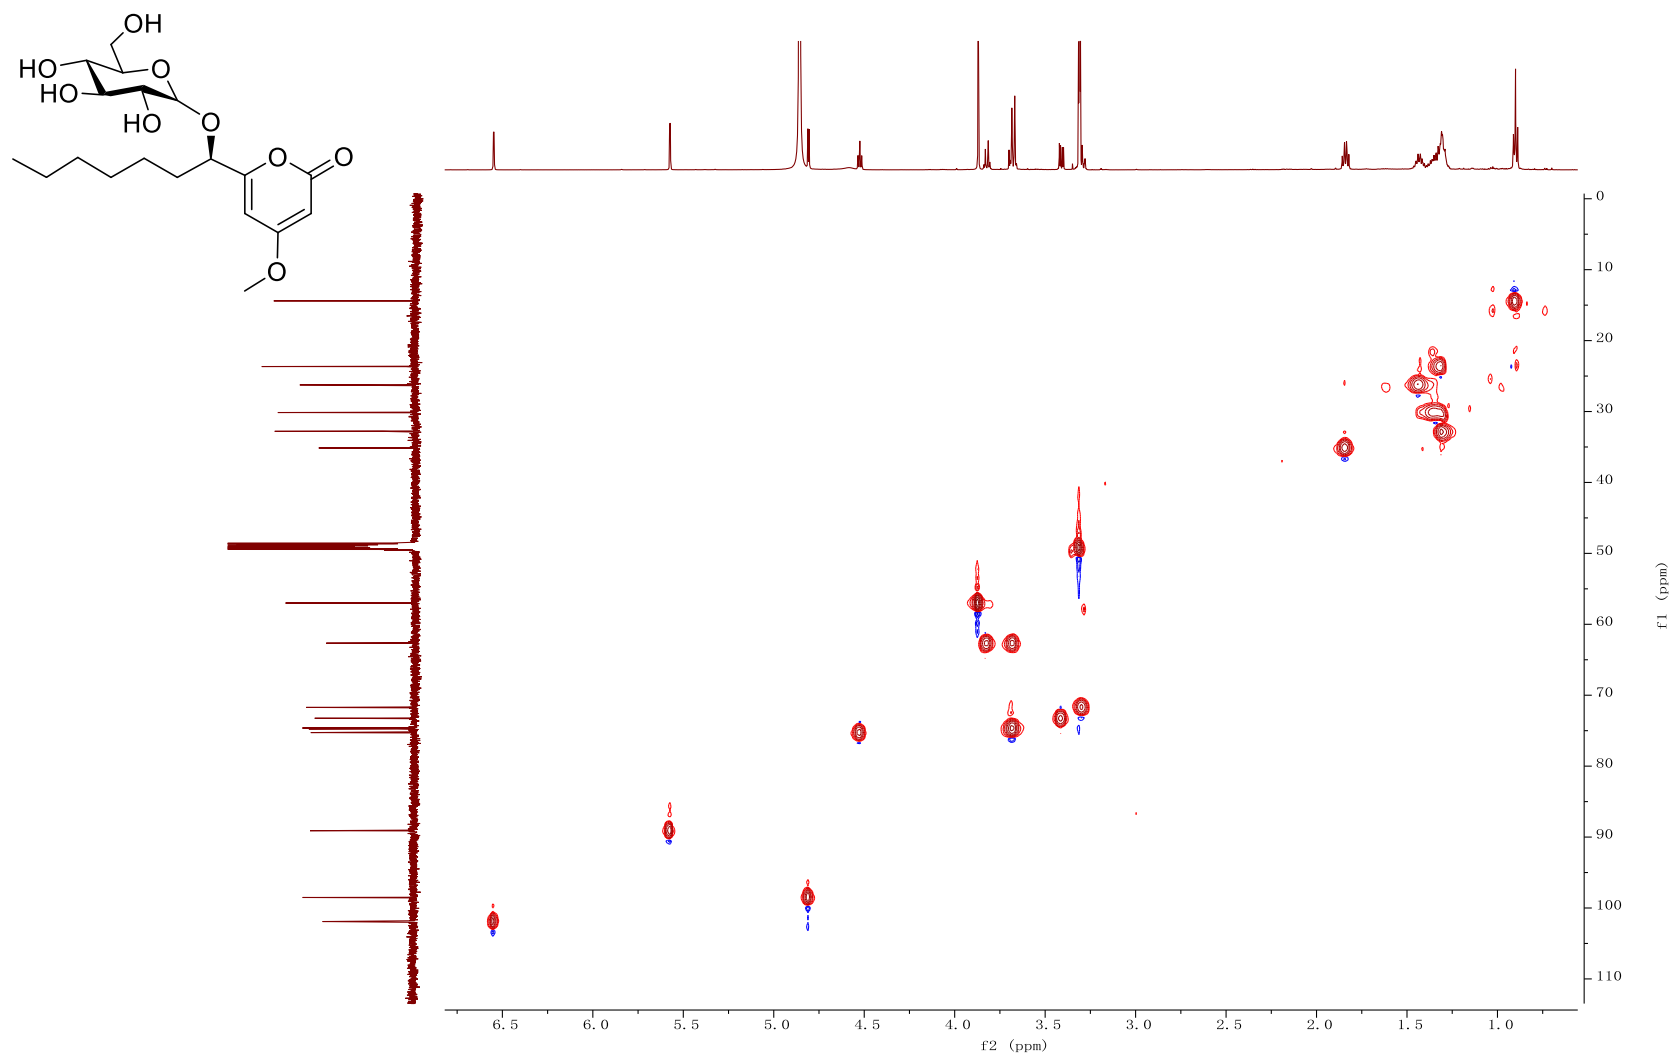

**Fig. S39** HSQC spectrum of **3** in methanol-*d*<sub>4</sub> (600 MHz).

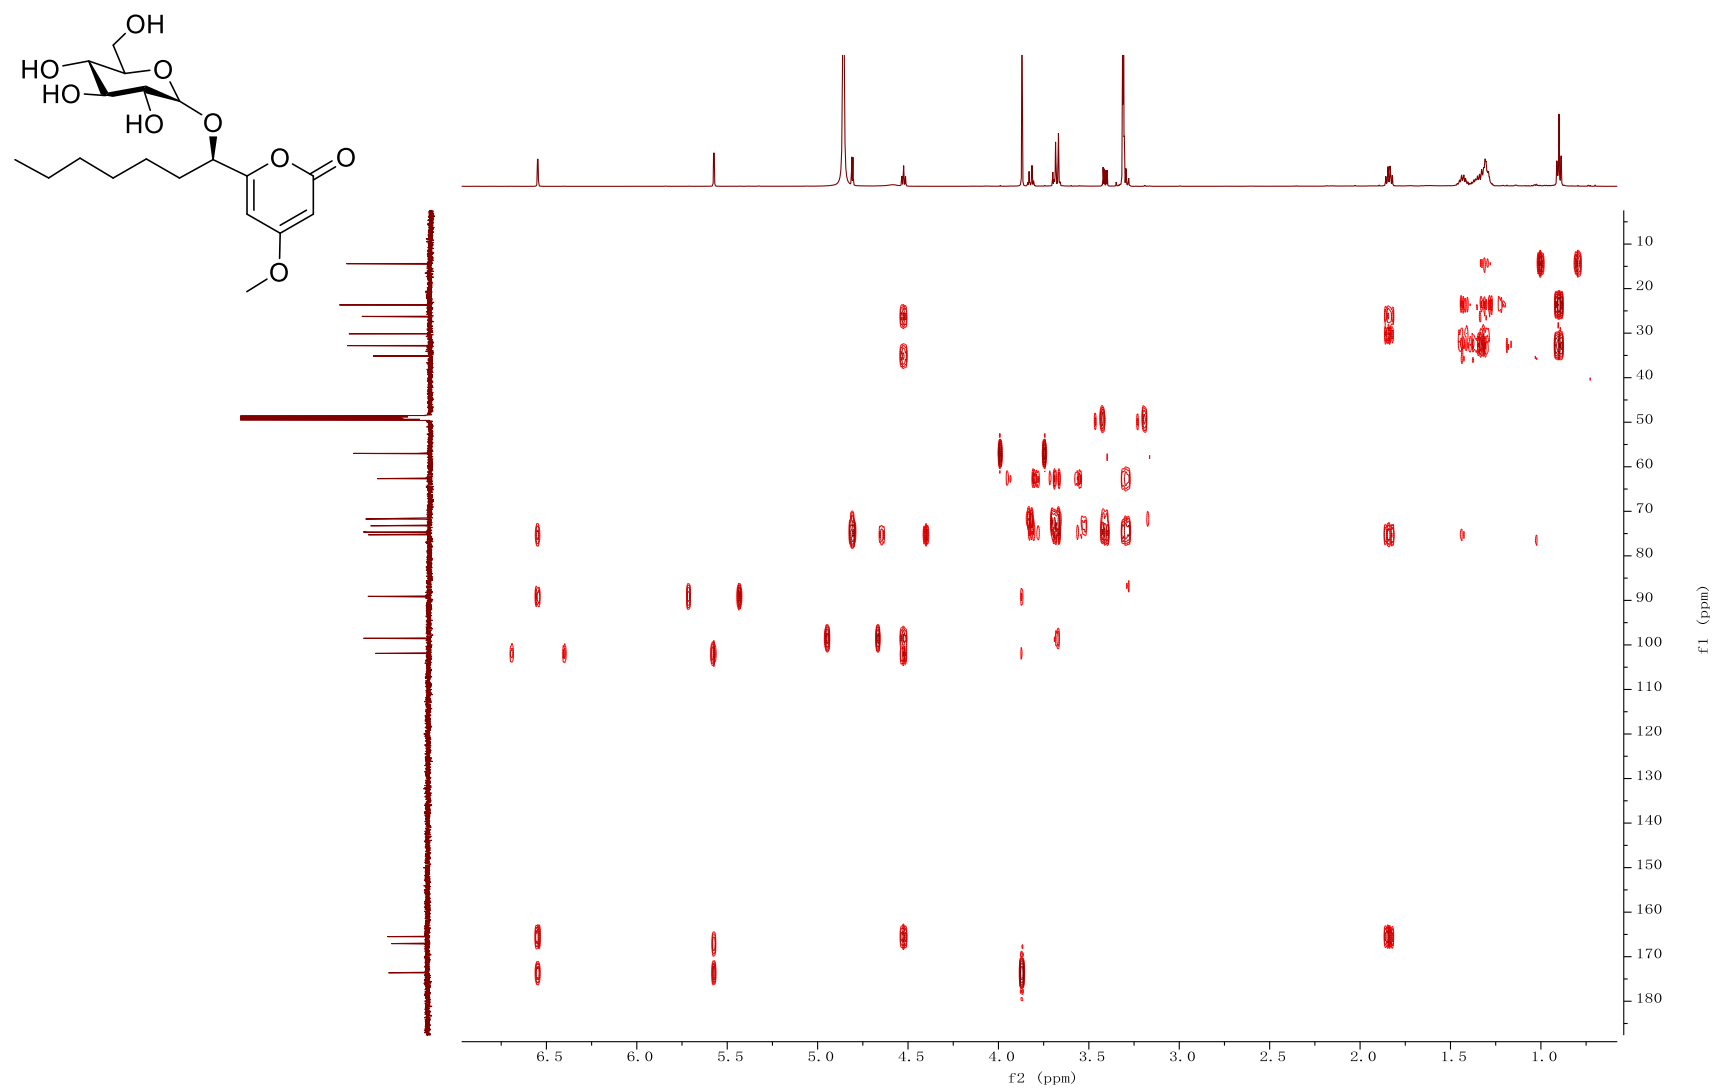

**Fig. S40** HMBC spectrum of **3** in methanol- $d_4$  (600 MHz).

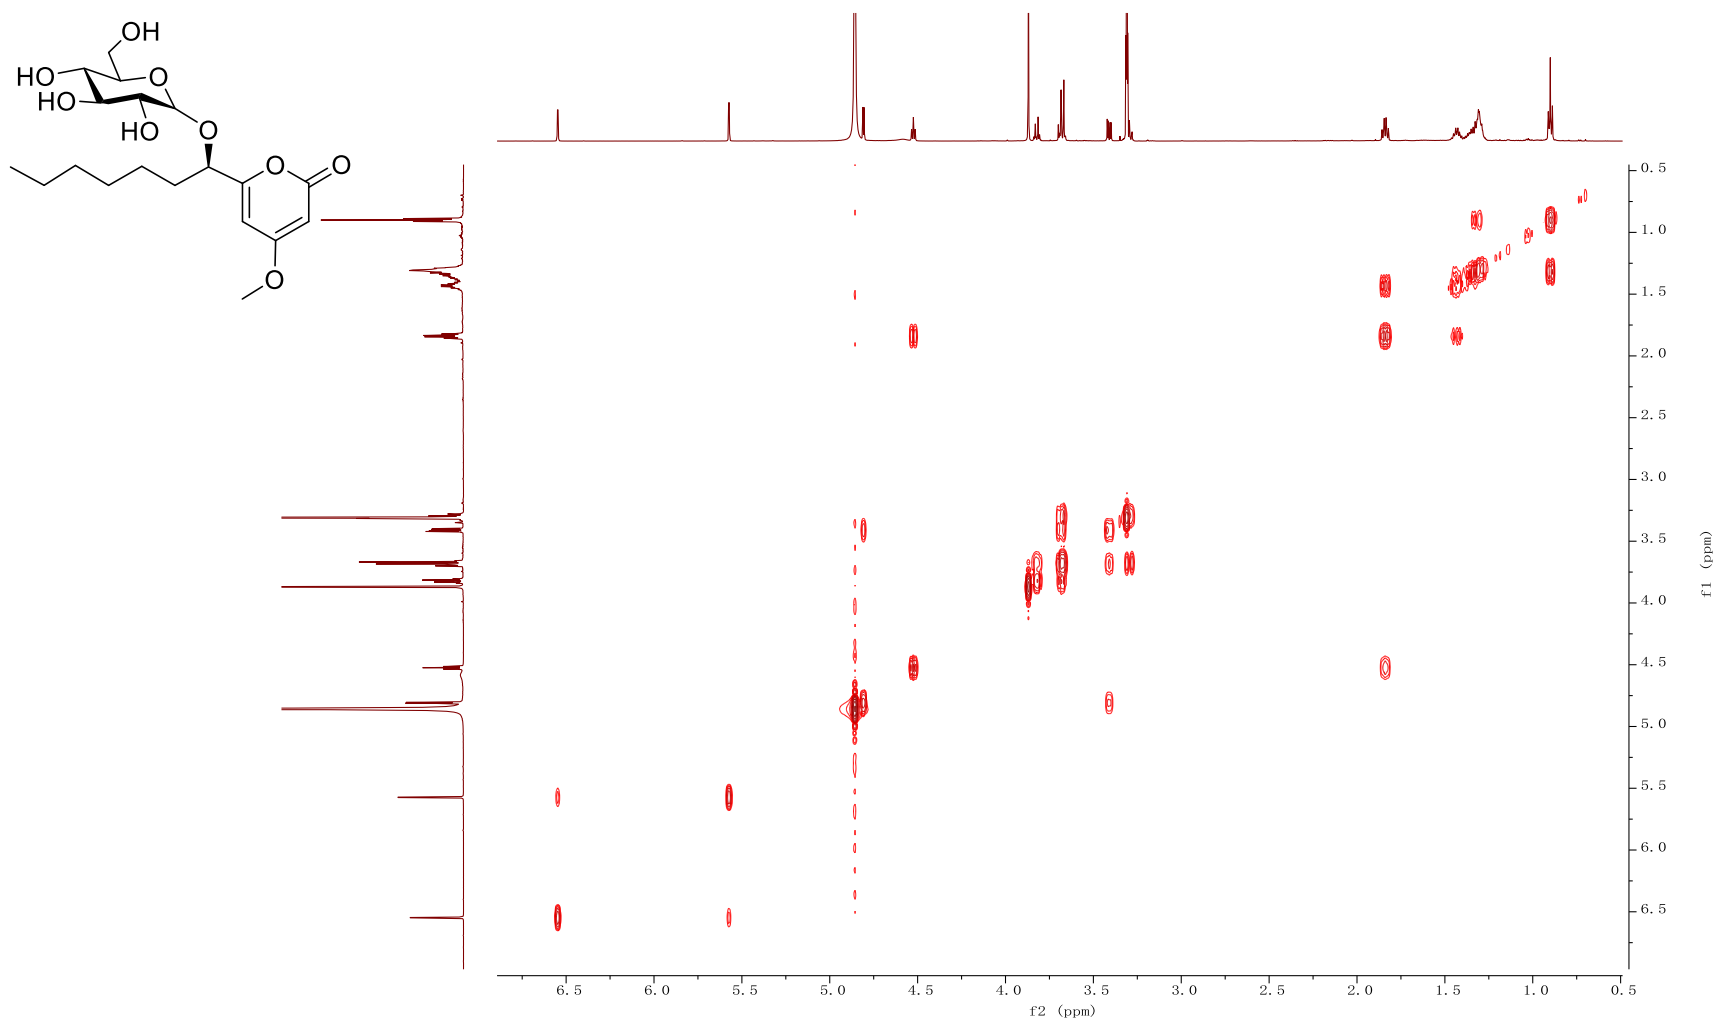

**Fig. S41**  $^1\text{H}$ - $^1\text{H}$  COSY spectrum of **3** in methanol- $d_4$  (600 MHz).

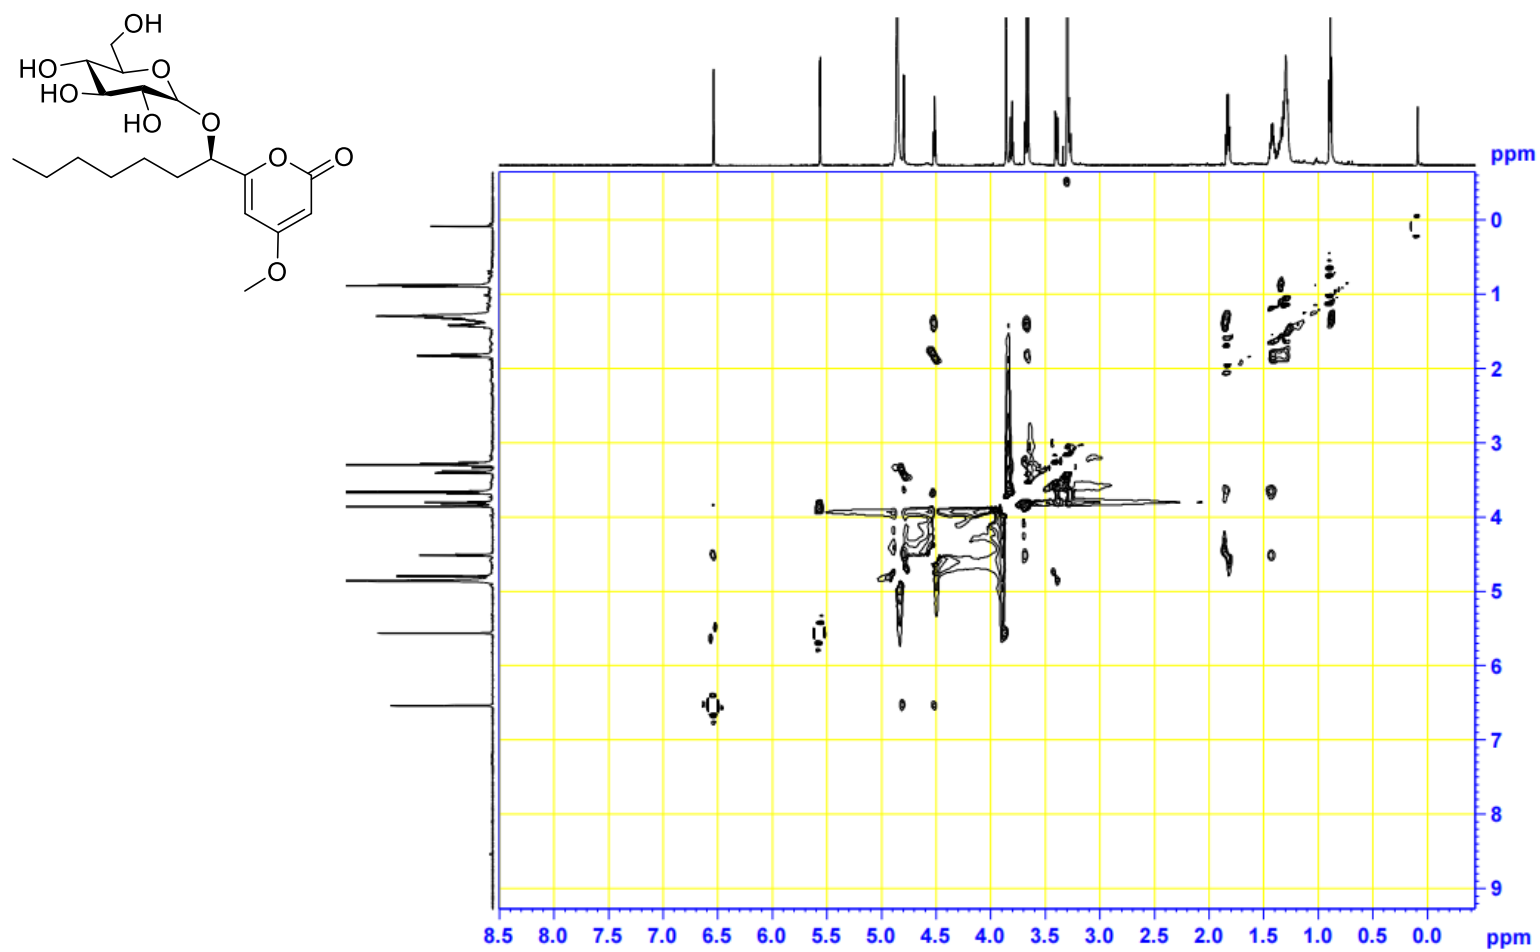

**Fig. S42** ROESY spectrum of **3** in methanol-*d*<sub>4</sub> (600 MHz).

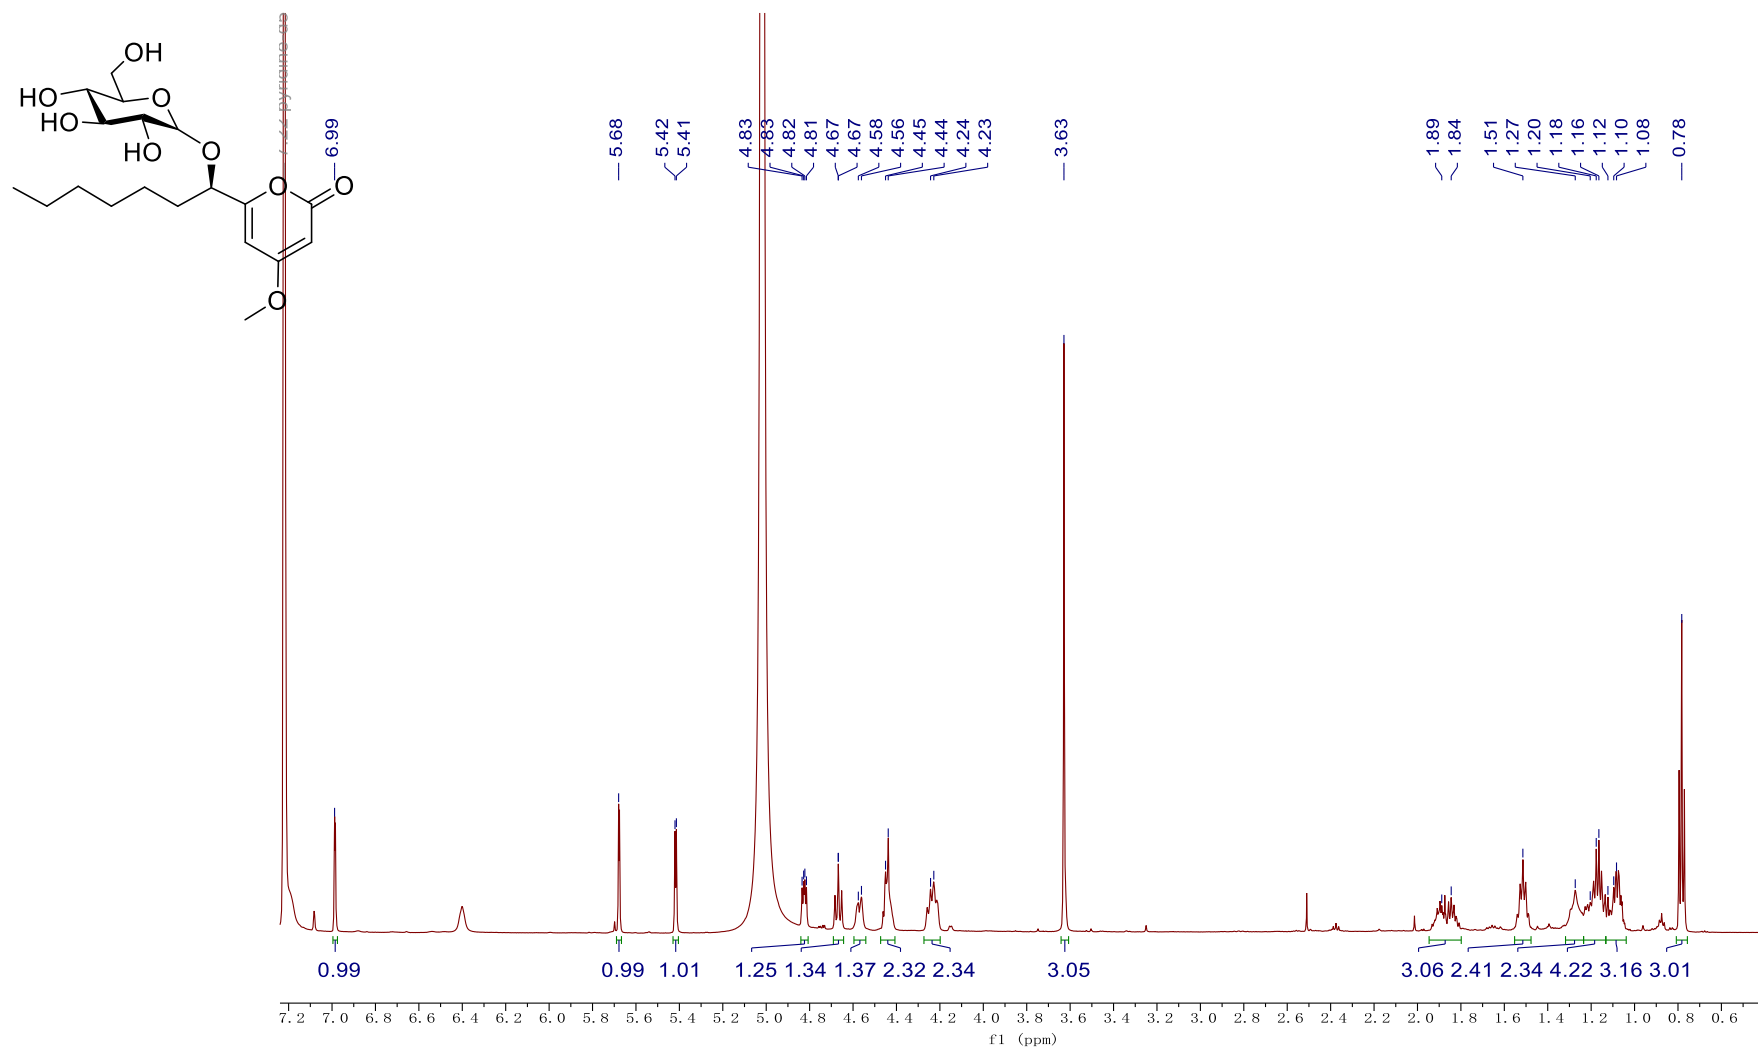

**Fig. S43**  $^1\text{H}$  NMR spectrum of **3** in  $\text{pyridine-}d_5$  (600 MHz).



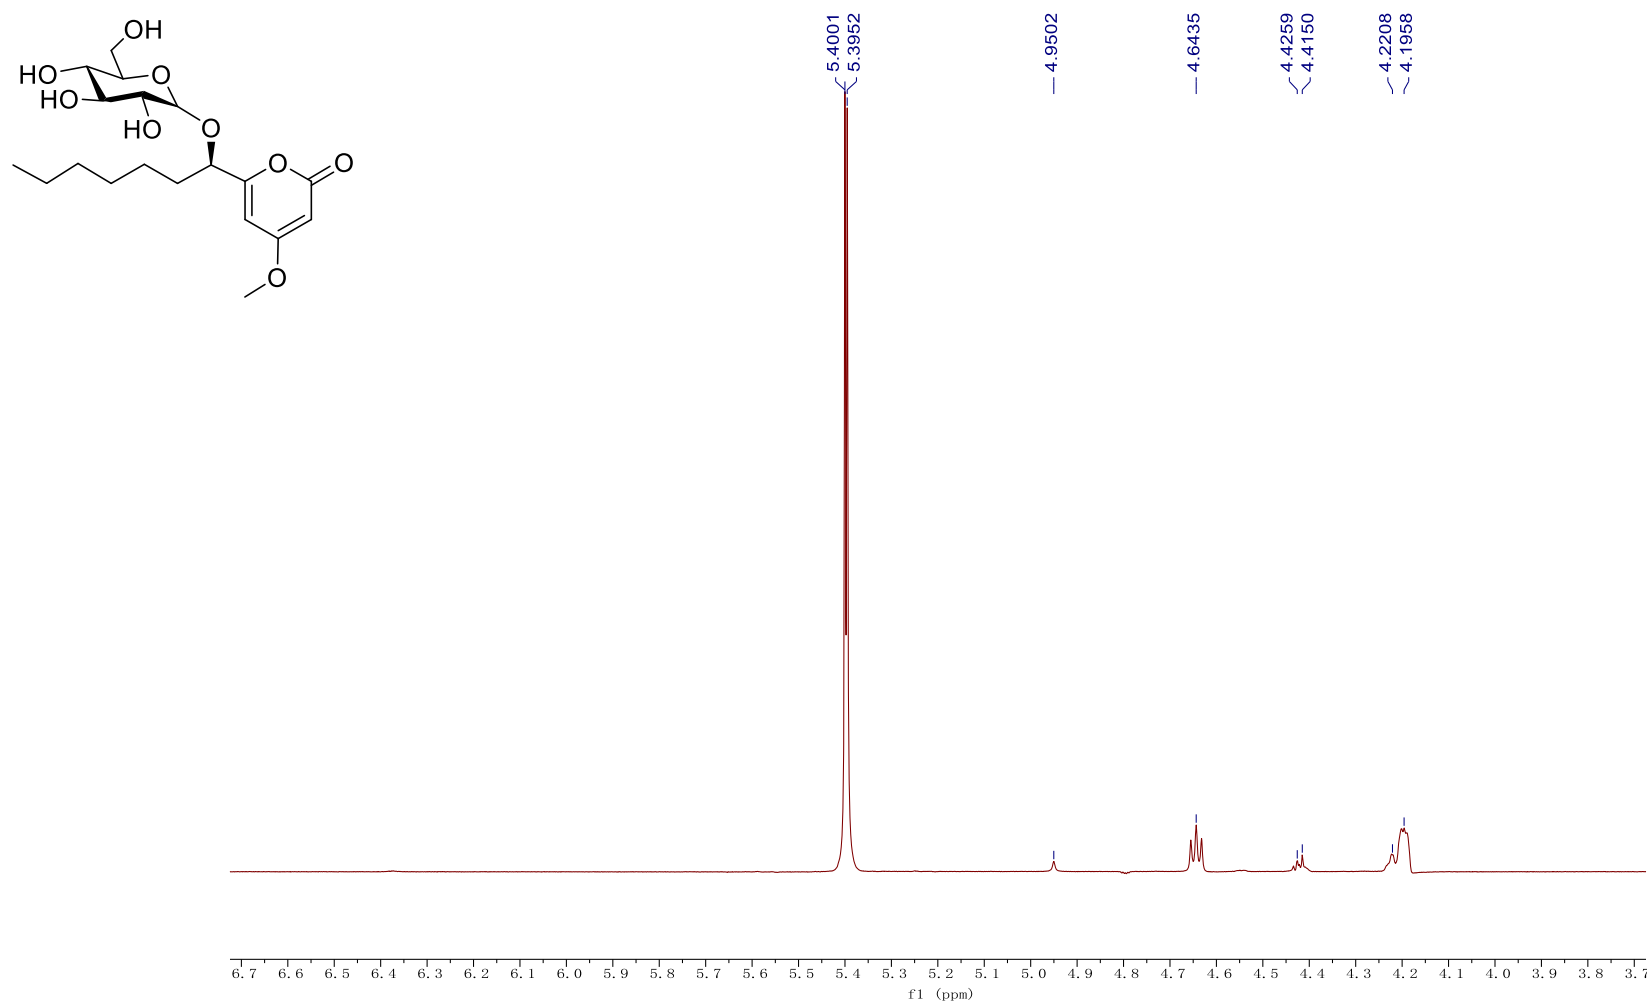

**Fig. S44** 1D-TOCSY spectrum of **3** in pyridine- $d_5$  (800 MHz).

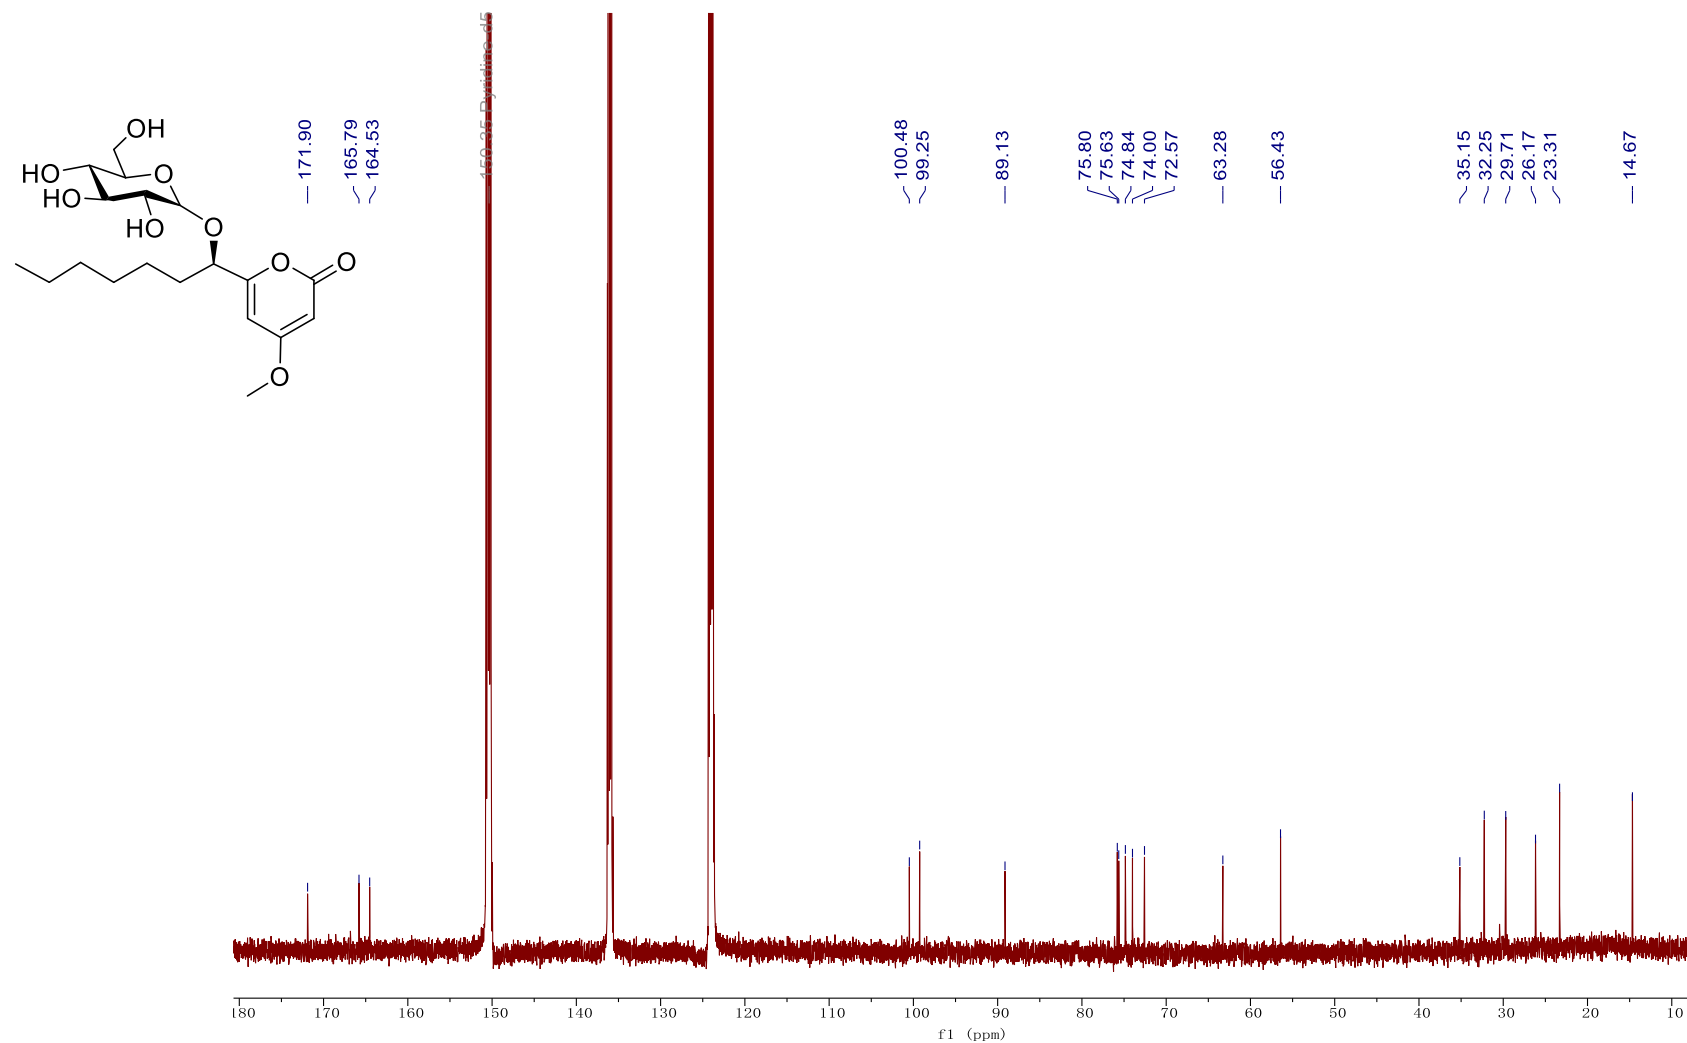

**Fig. S45**  $^{13}\text{C}$  NMR spectrum of **3** in pyridine- $d_5$  (150 MHz).

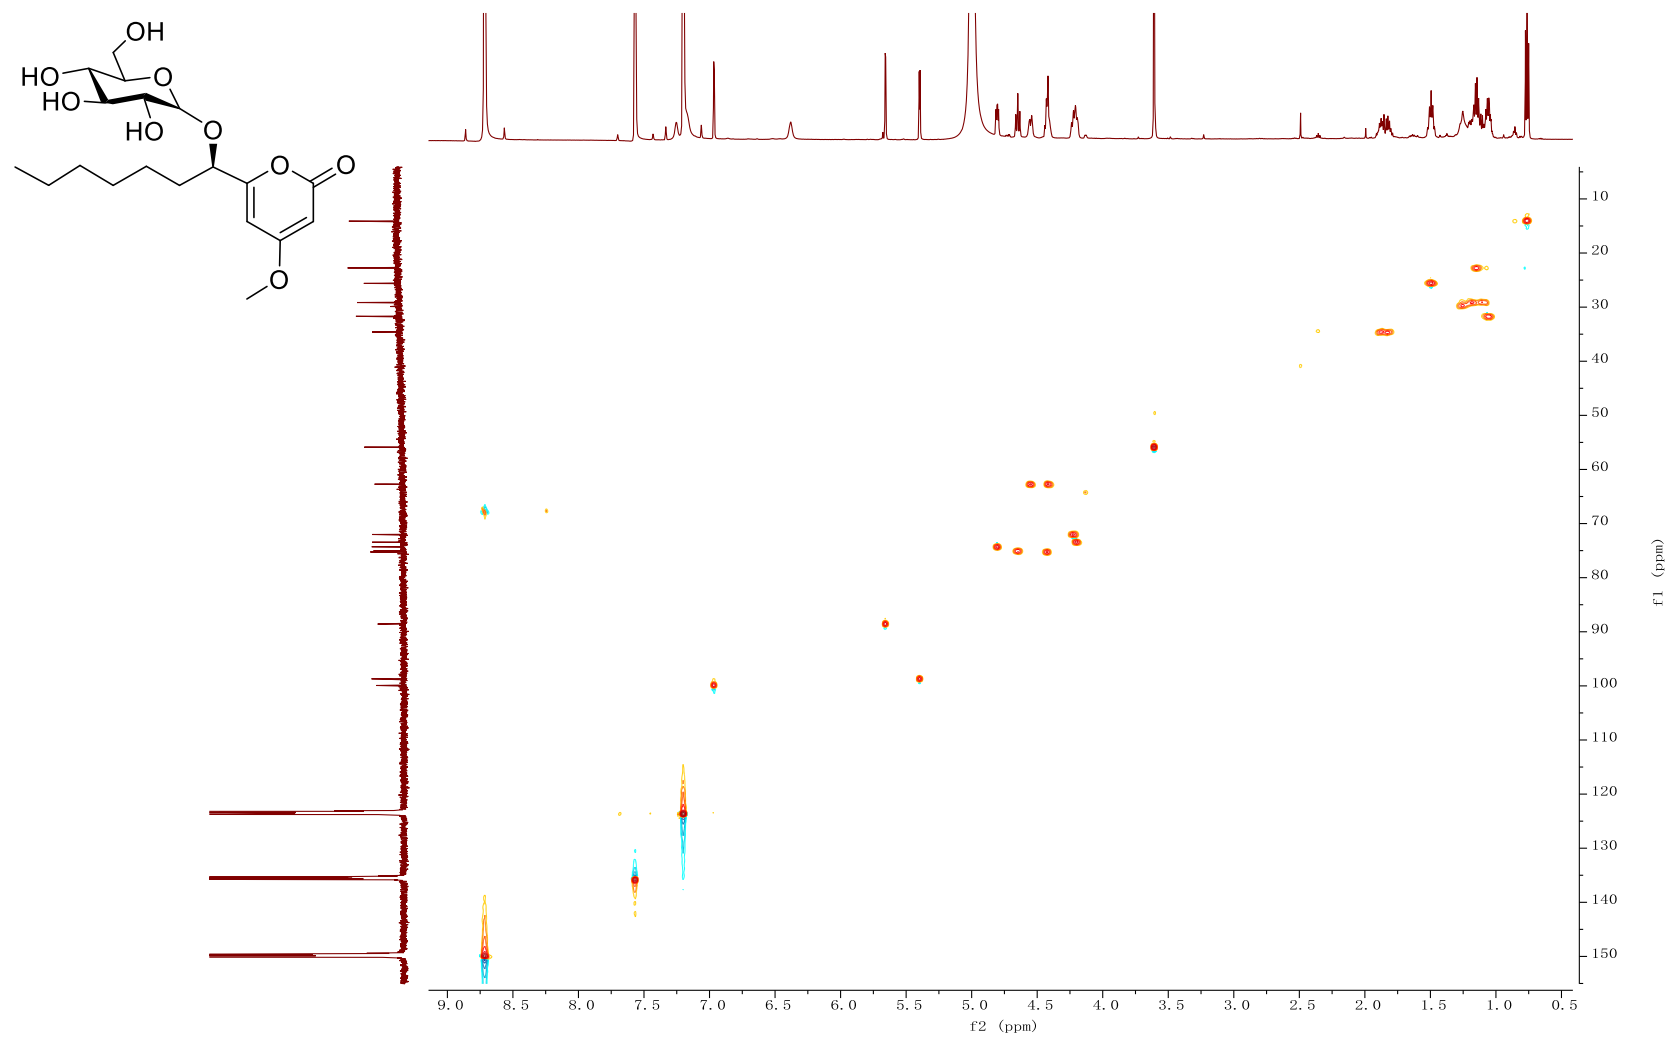

**Fig. S46** HSQC spectrum of **3** in pyridine- $d_5$  (600 MHz).

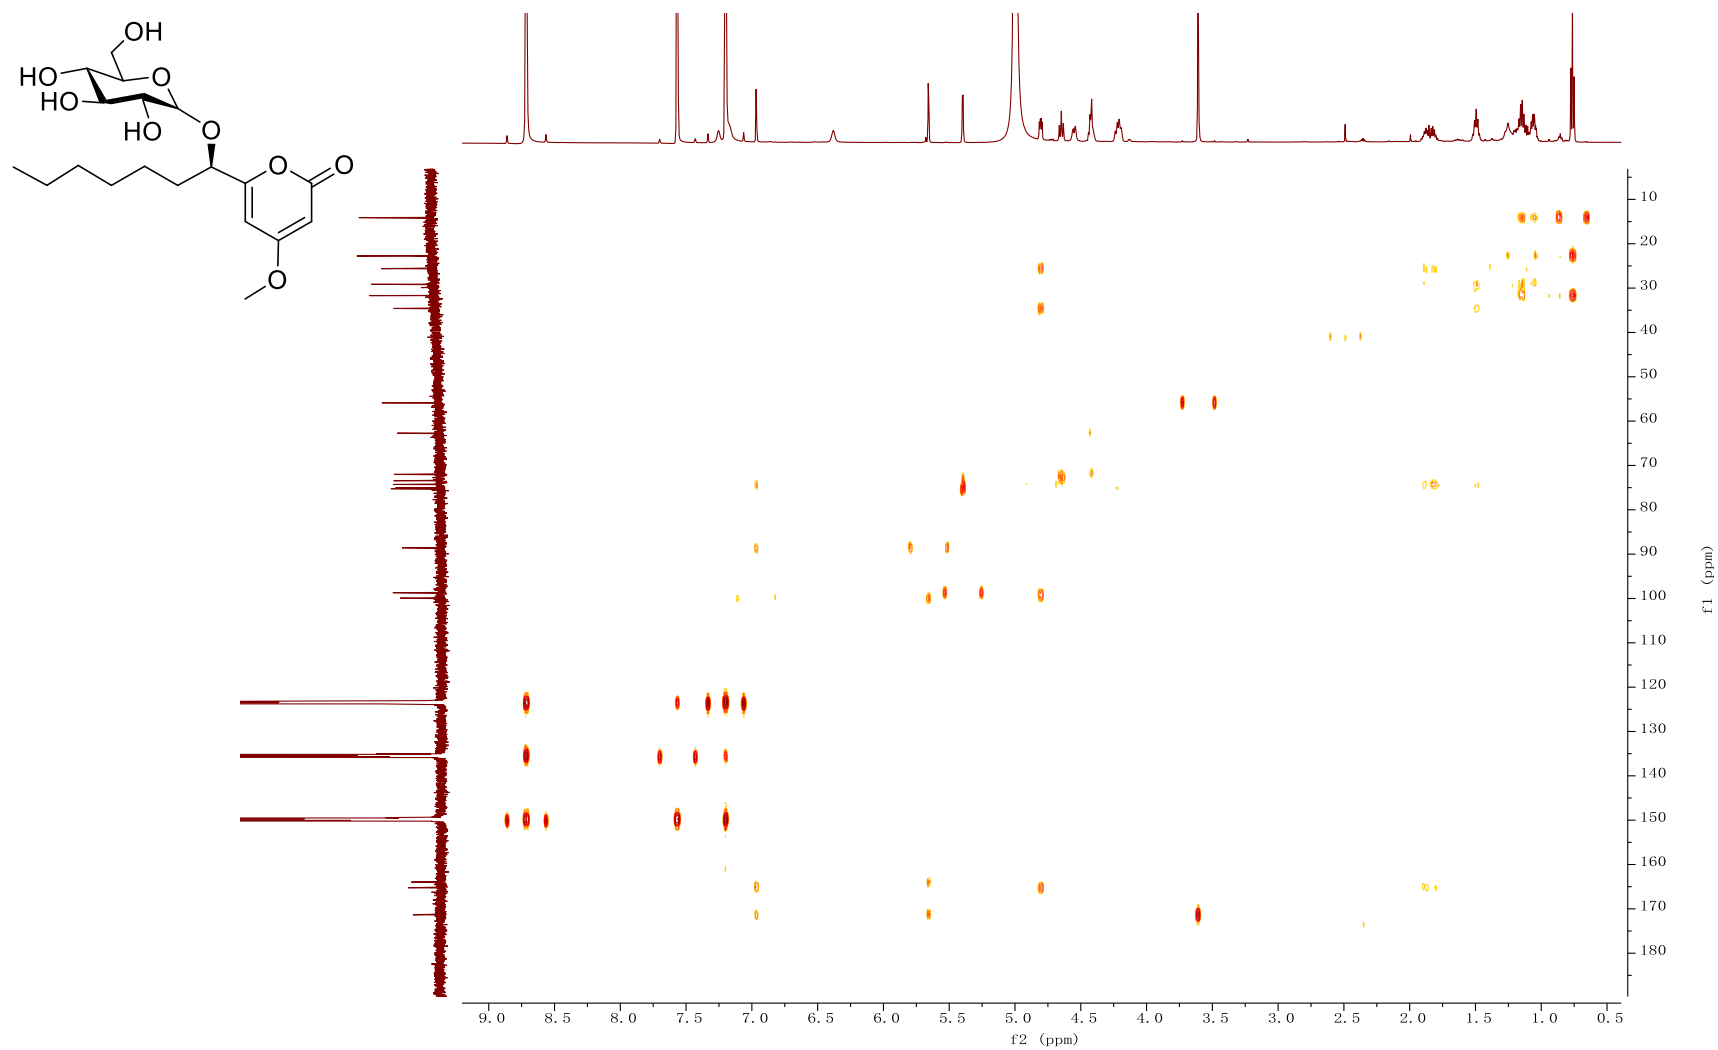

**Fig. S47** HMBC spectrum of **3** in pyridine-*d*<sub>5</sub> (600 MHz).

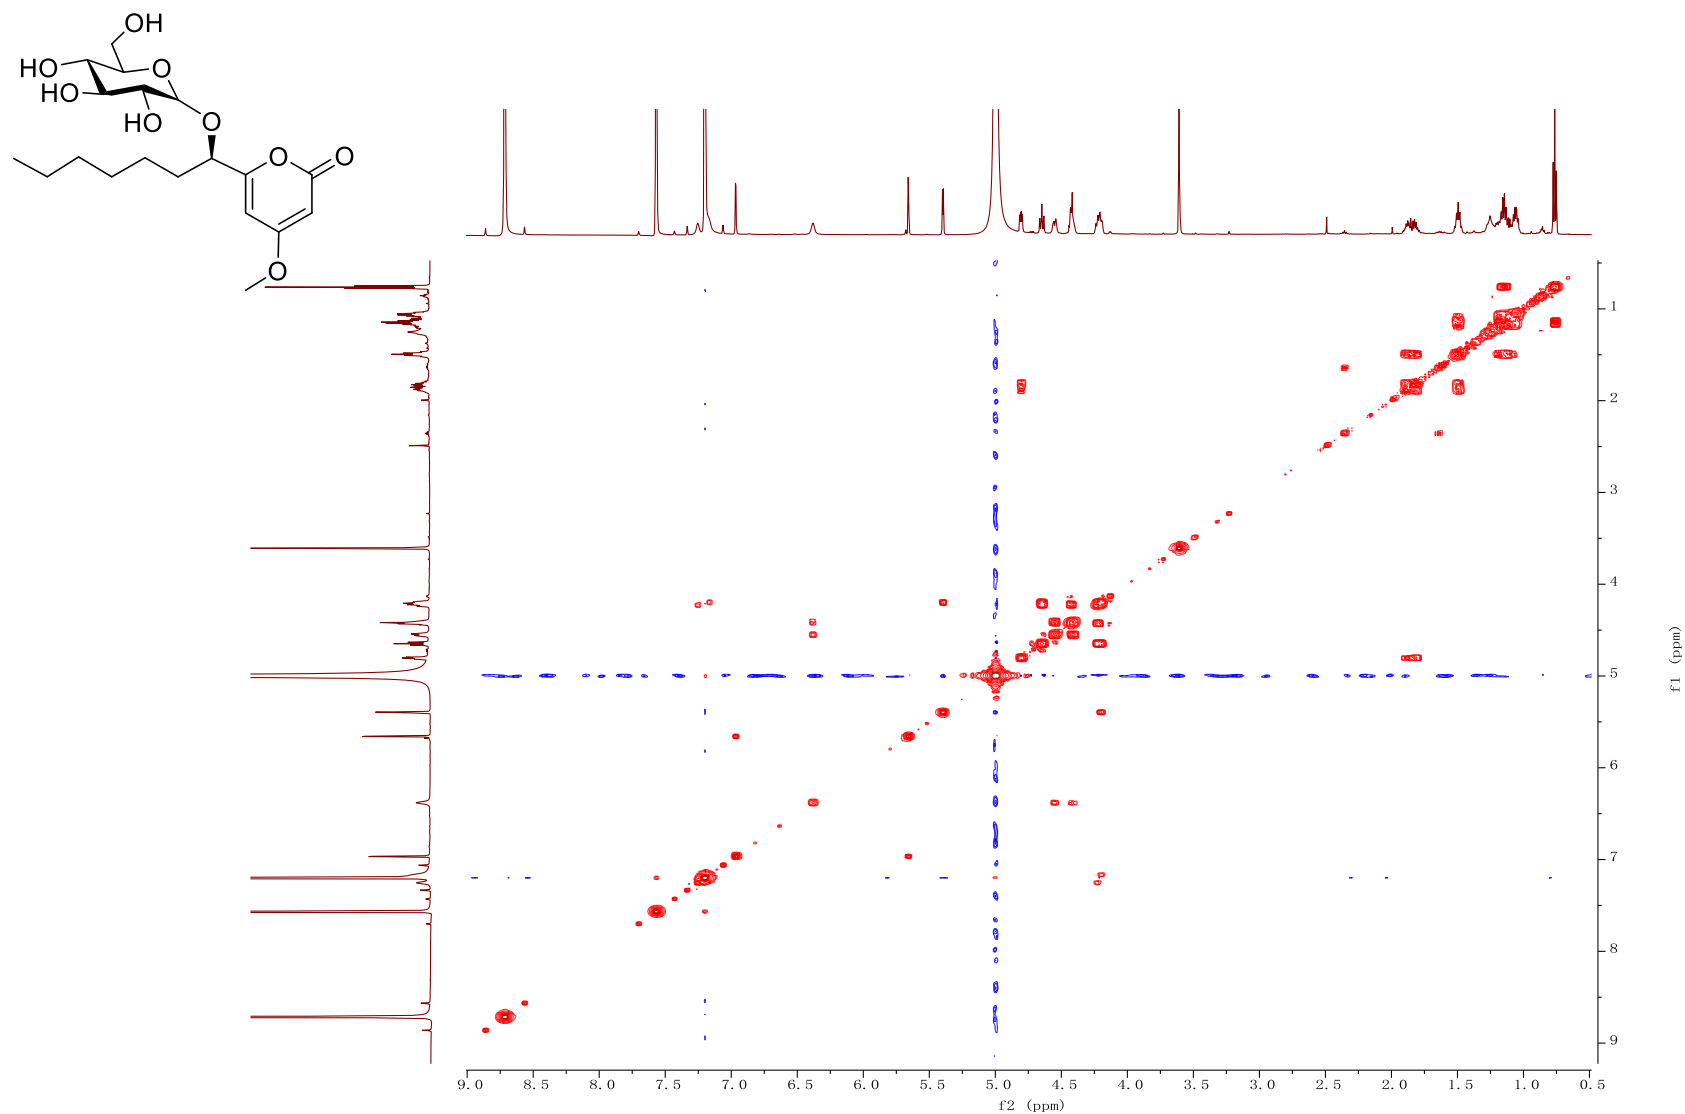

**Fig. S48**  $^1\text{H}$ - $^1\text{H}$  COSY spectrum of **2** in  $\text{pyridine-}d_5$  (600 MHz).

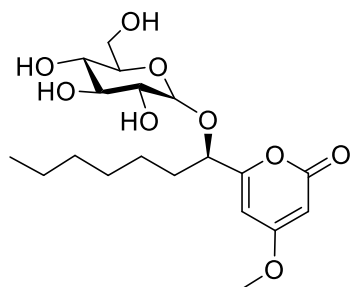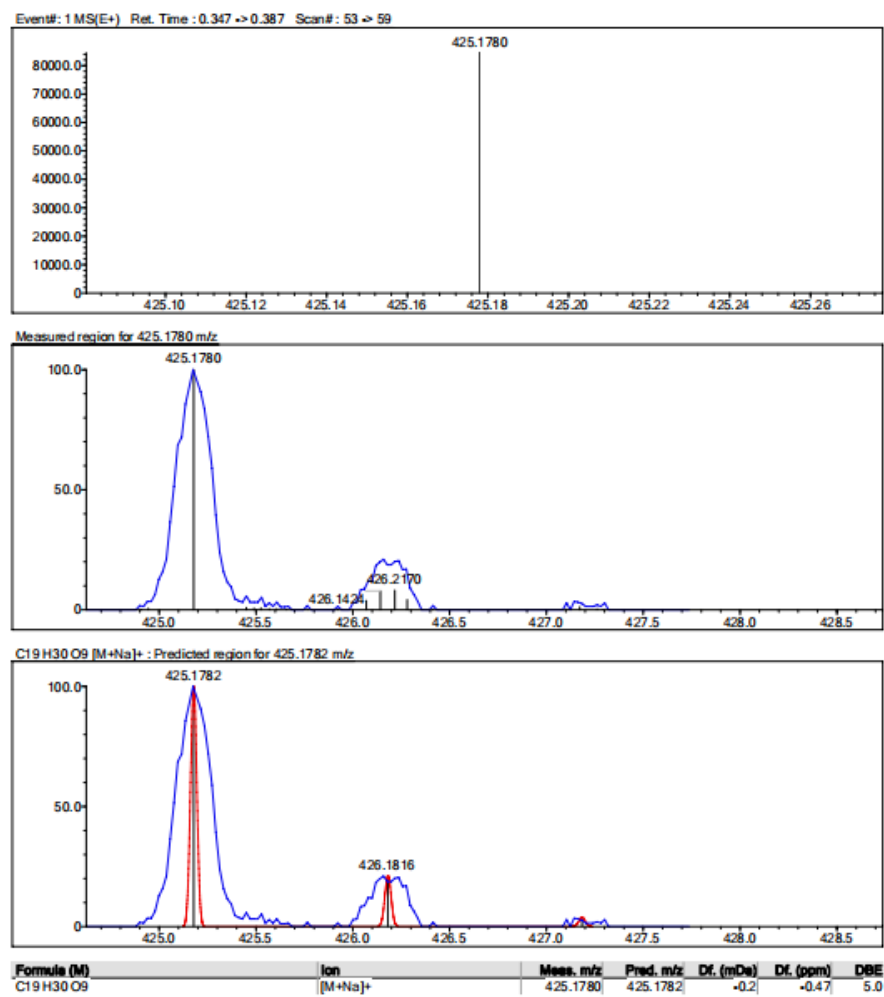

Fig. S49 HRESIMS spectrum of 3.

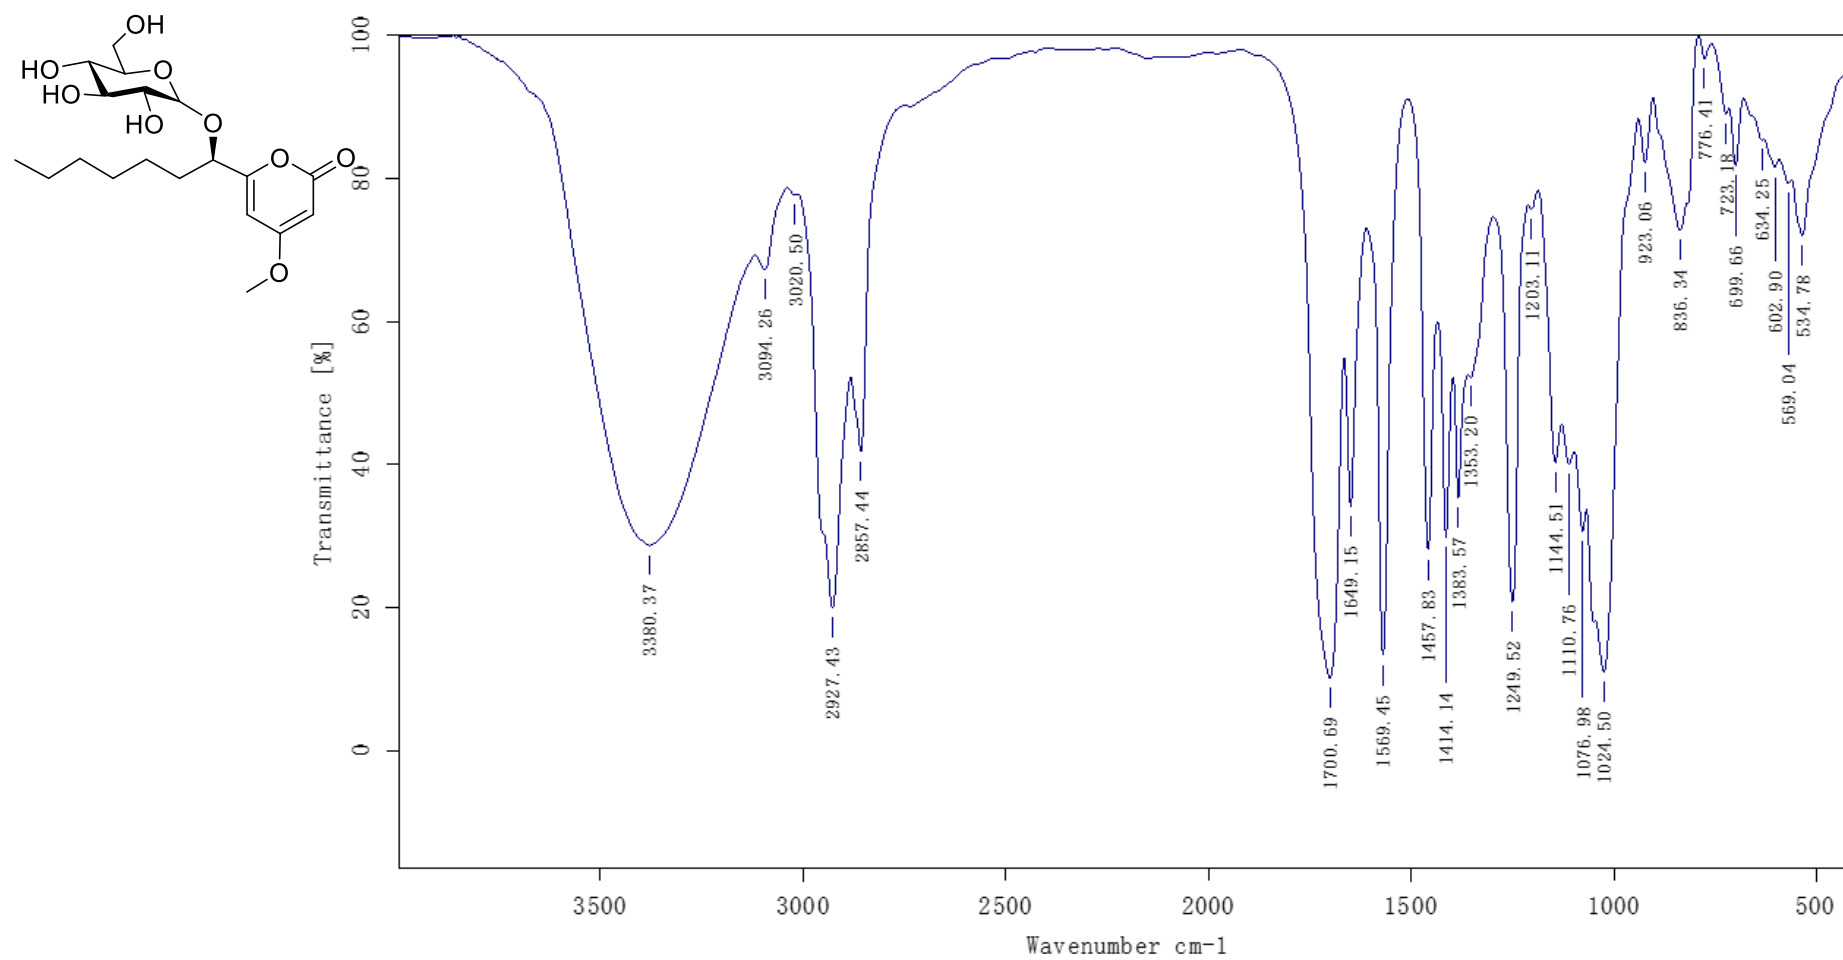

**Fig. S50** IR spectrum of **3**.

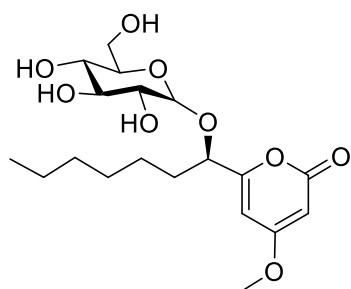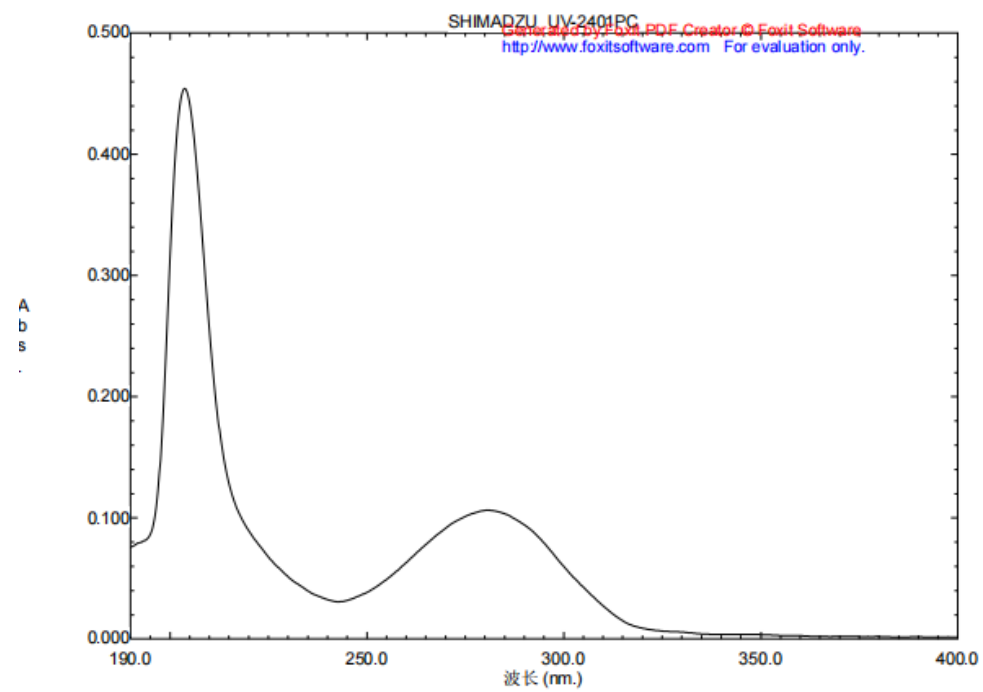

**Fig. S51** UV spectrum of **3**.



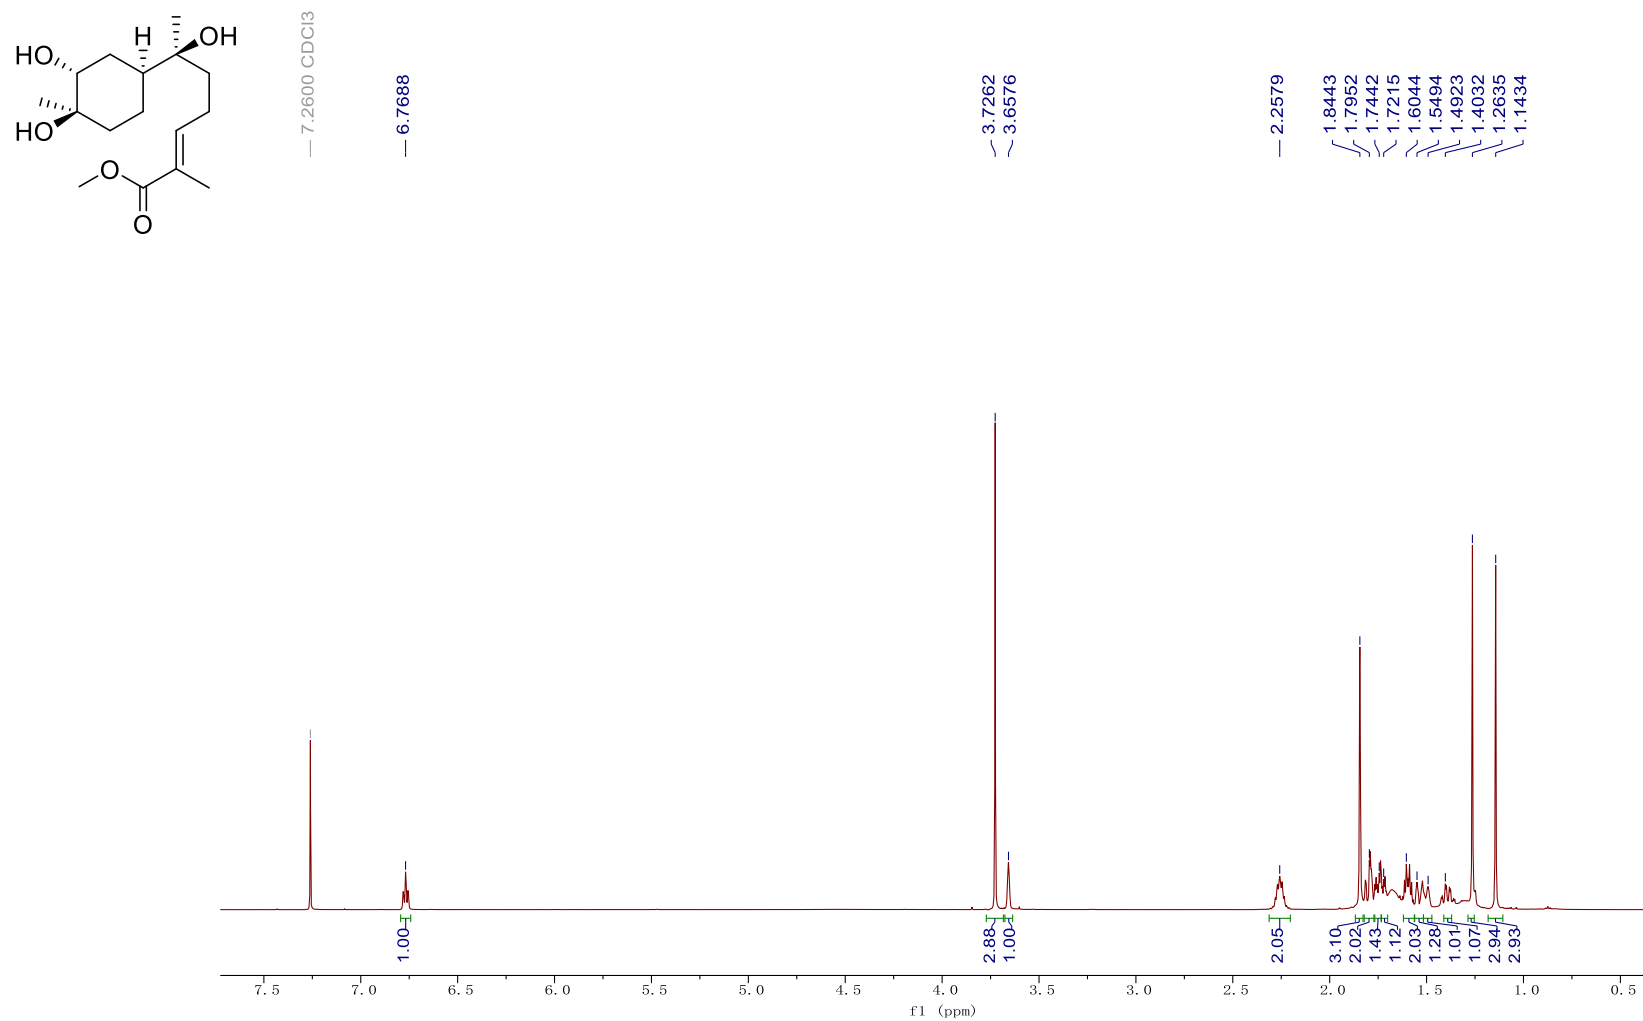

**Fig. S52** <sup>1</sup>H NMR Spectrum of **4** in chloroform-*d* (600 MHz).

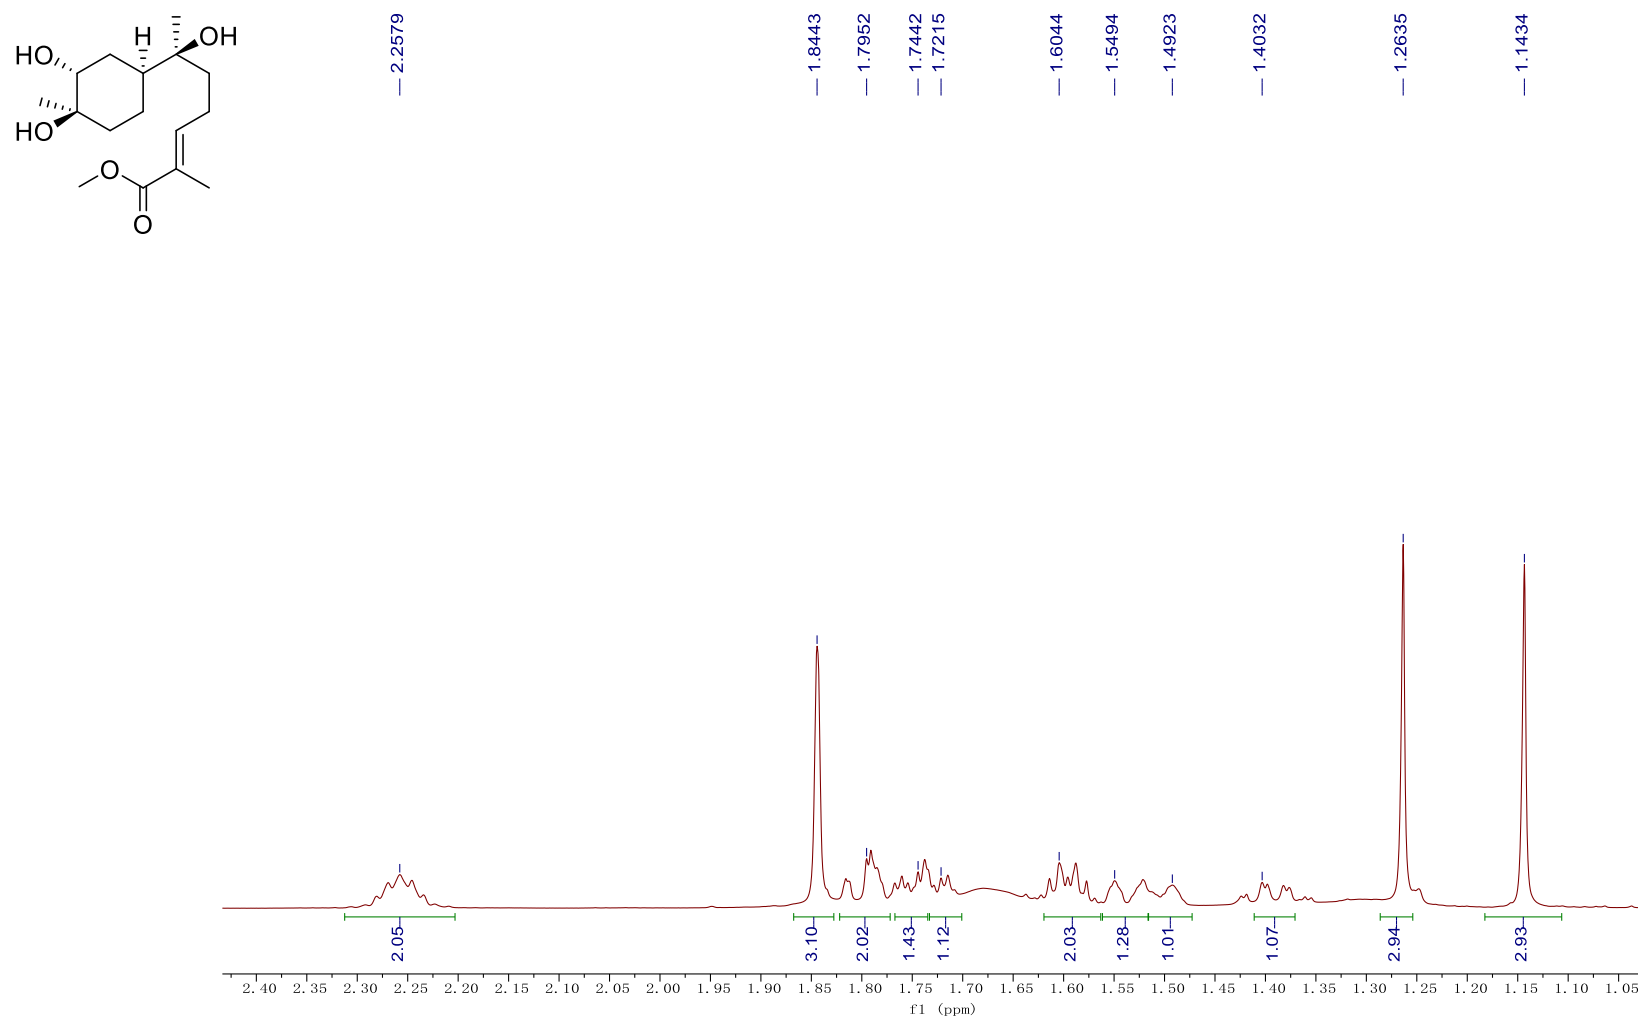

**Fig. S53** <sup>1</sup>H NMR Spectrum of **4** in chloroform-*d* (600 MHz) (expanded).

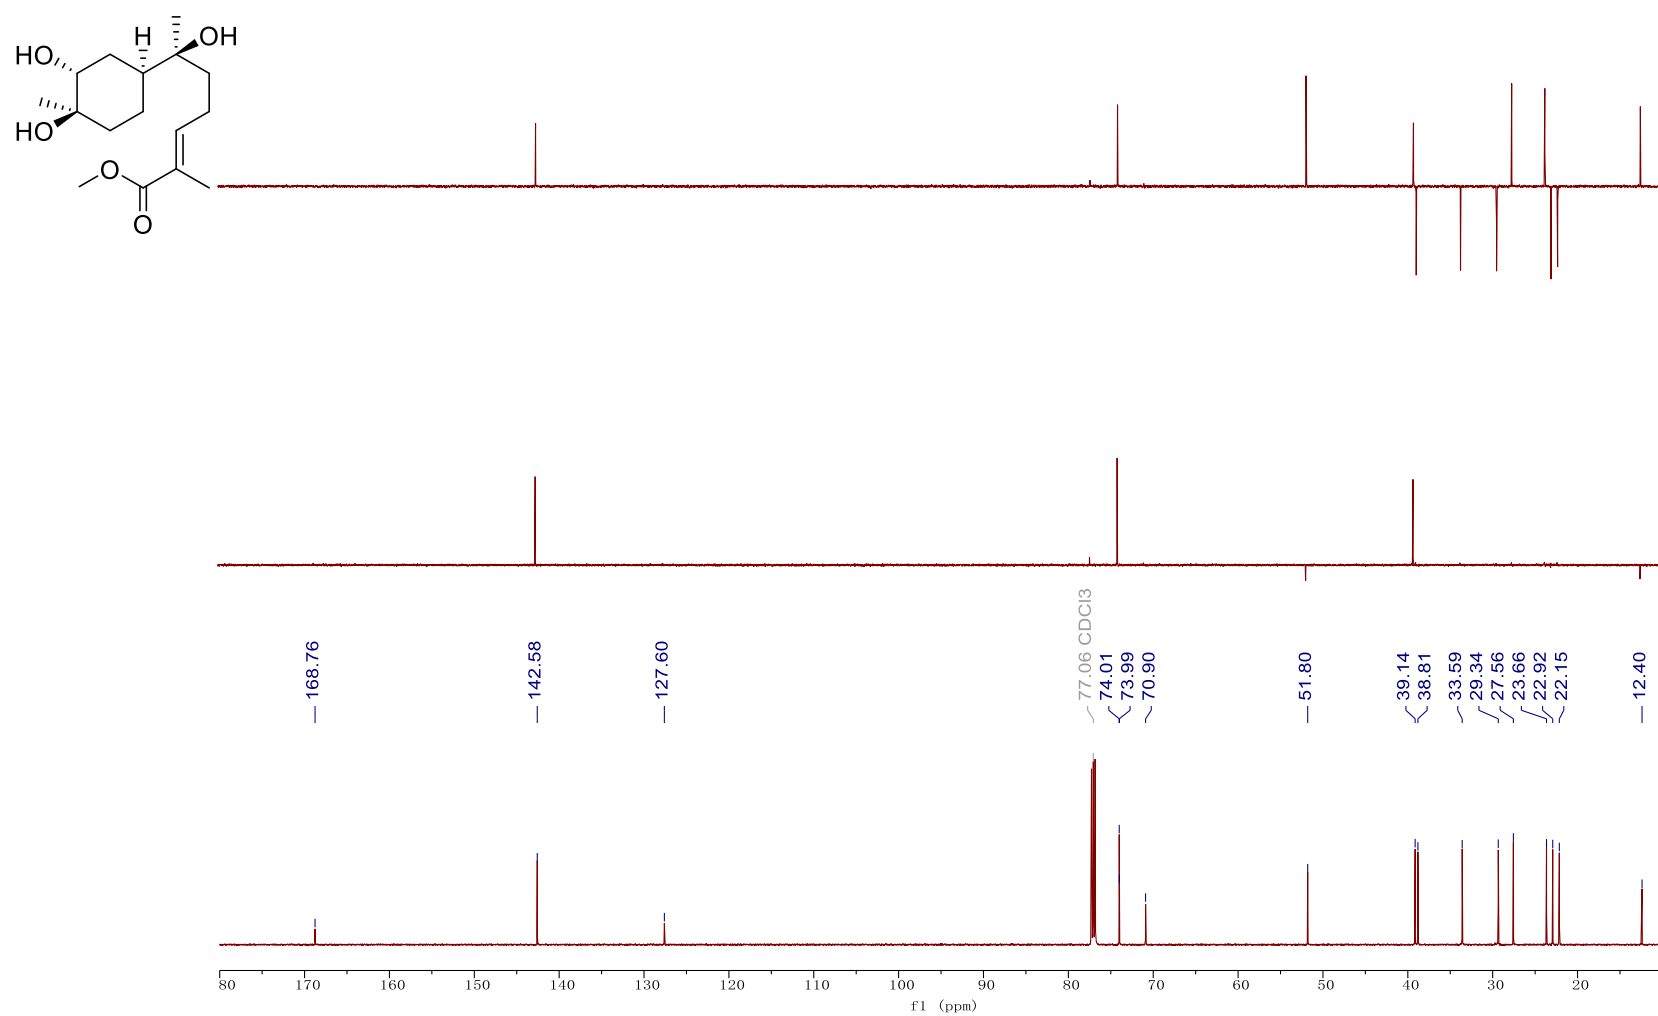

**Fig. S54** <sup>13</sup>C NMR Spectrum of **4** in chloroform-*d* (150 MHz).

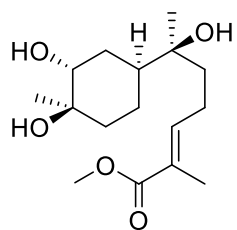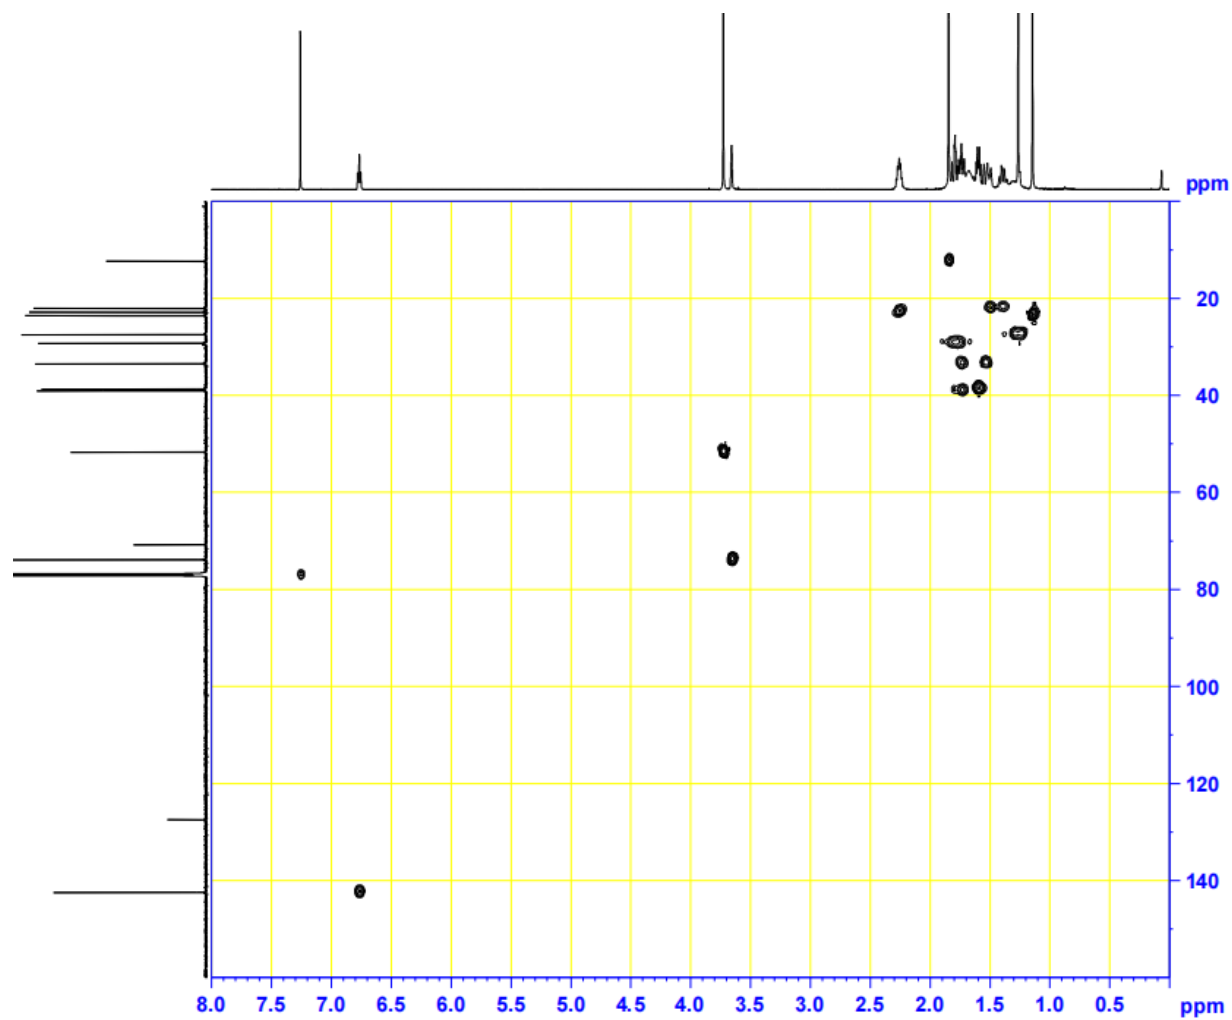

Fig. S55 HSQC Spectrum of **4** in chloroform-*d* (600 MHz).

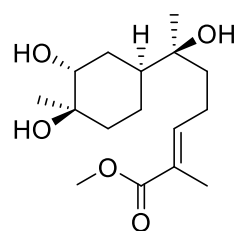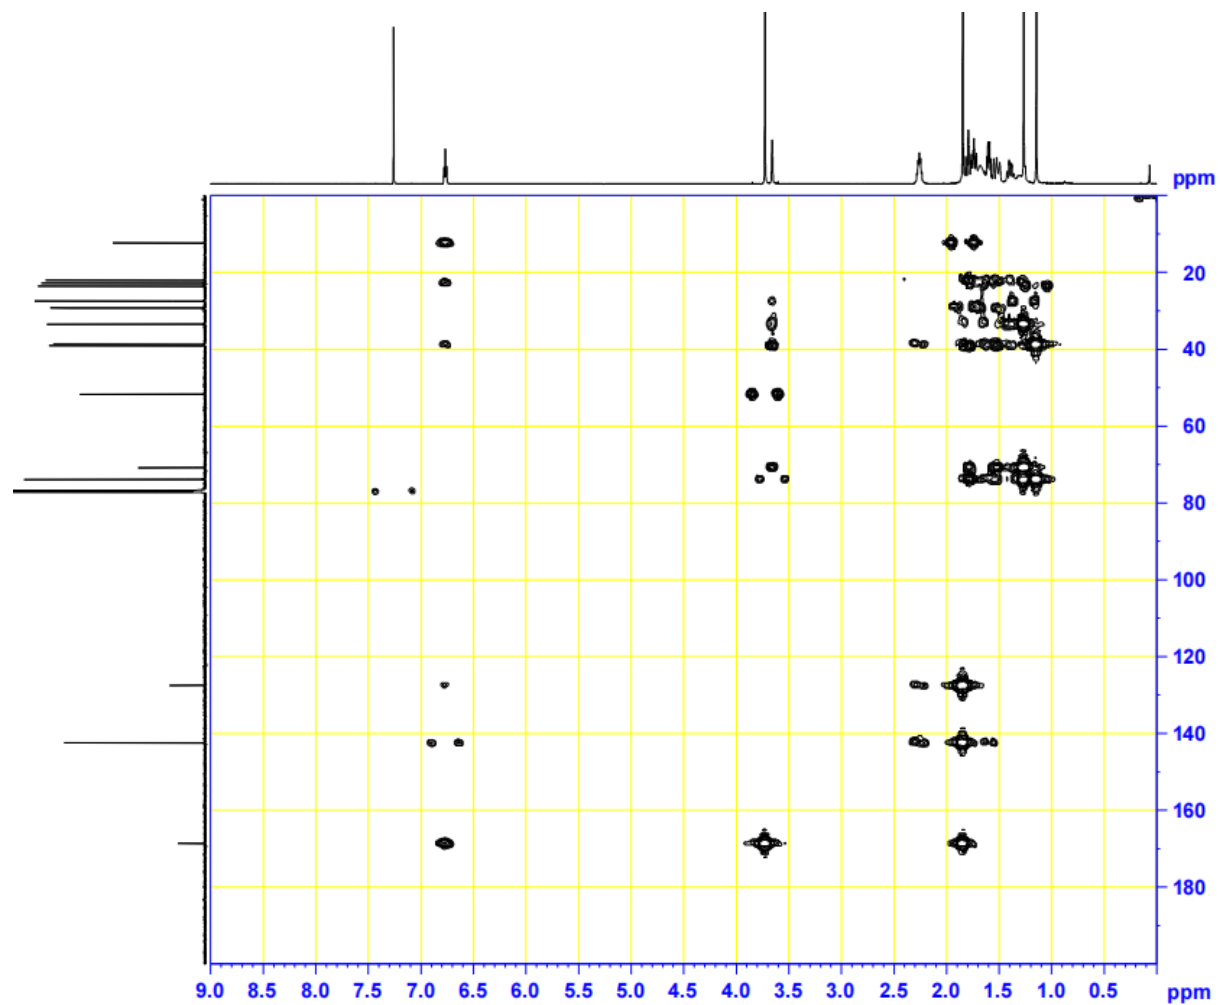

Fig. S56 HMBC Spectrum of **4** in chloroform-*d* (600 MHz).

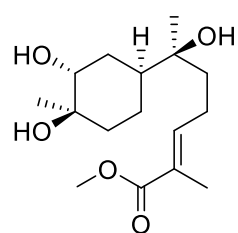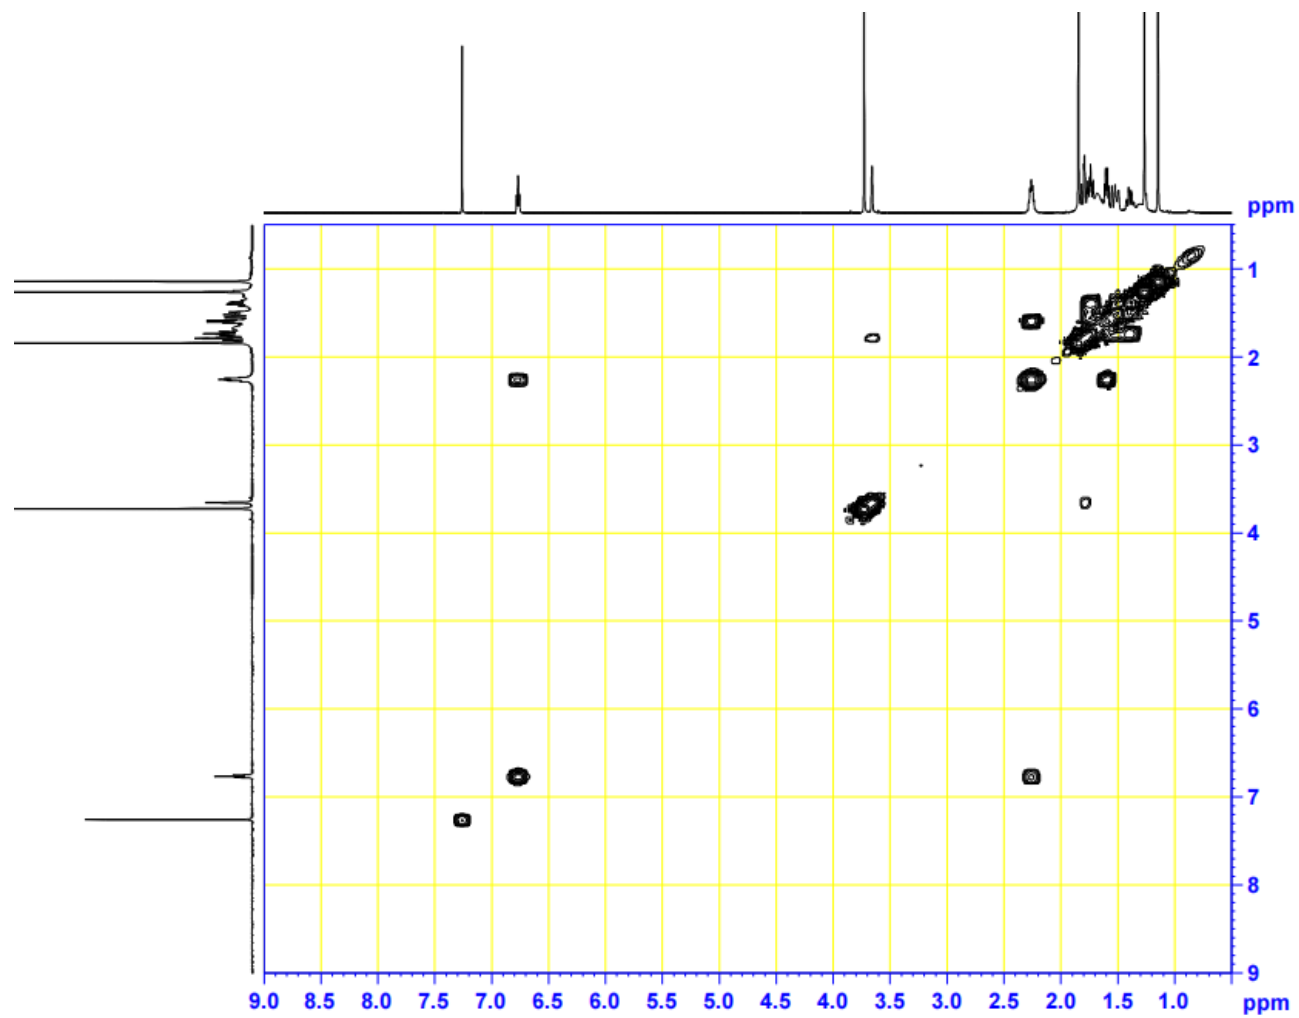

**Fig. S57**  $^1\text{H}$ - $^1\text{H}$  COSY Spectrum of **4** in chloroform-*d* (600 MHz).

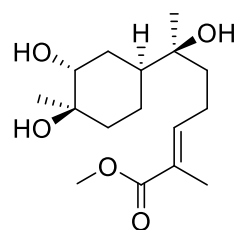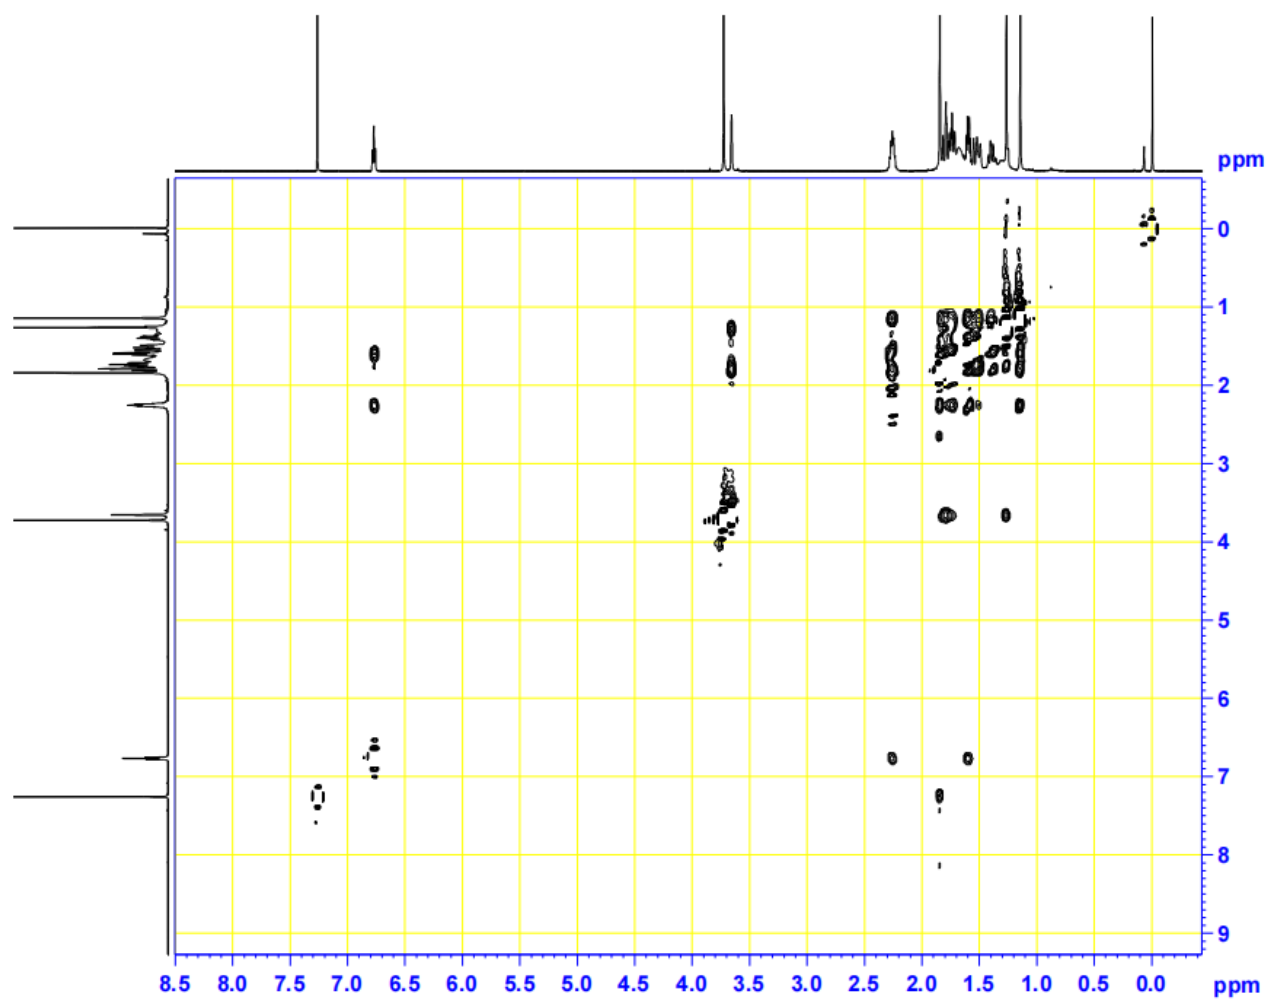

Fig. S58 ROESY Spectrum of **4** in chloroform-*d* (600 MHz).

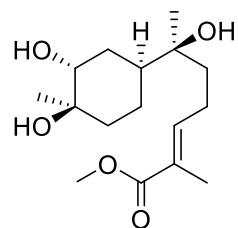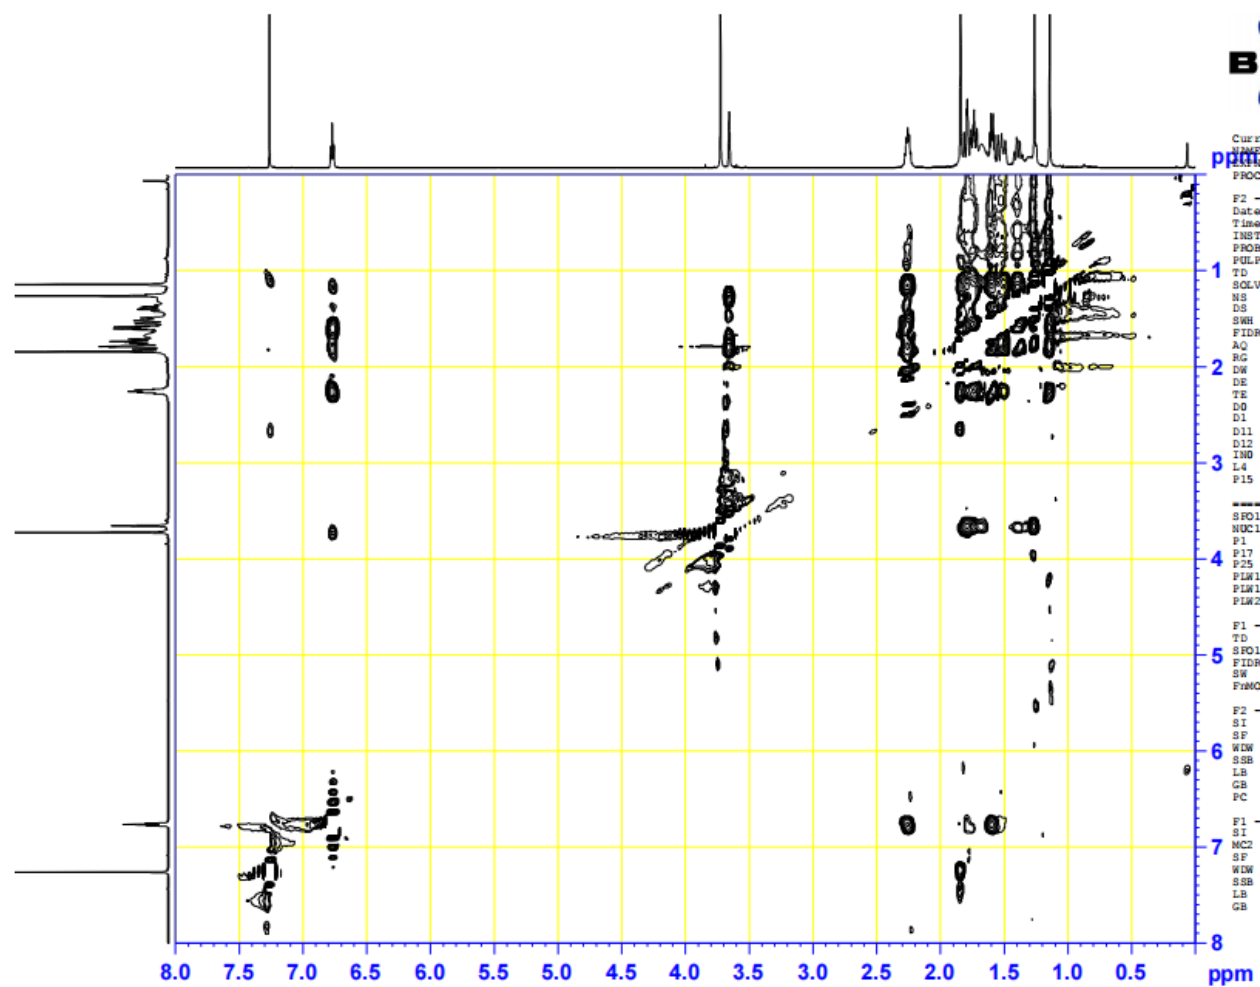

Fig. S59 ROESY Spectrum of **4** in chloroform-*d* (600 MHz) (expanded).



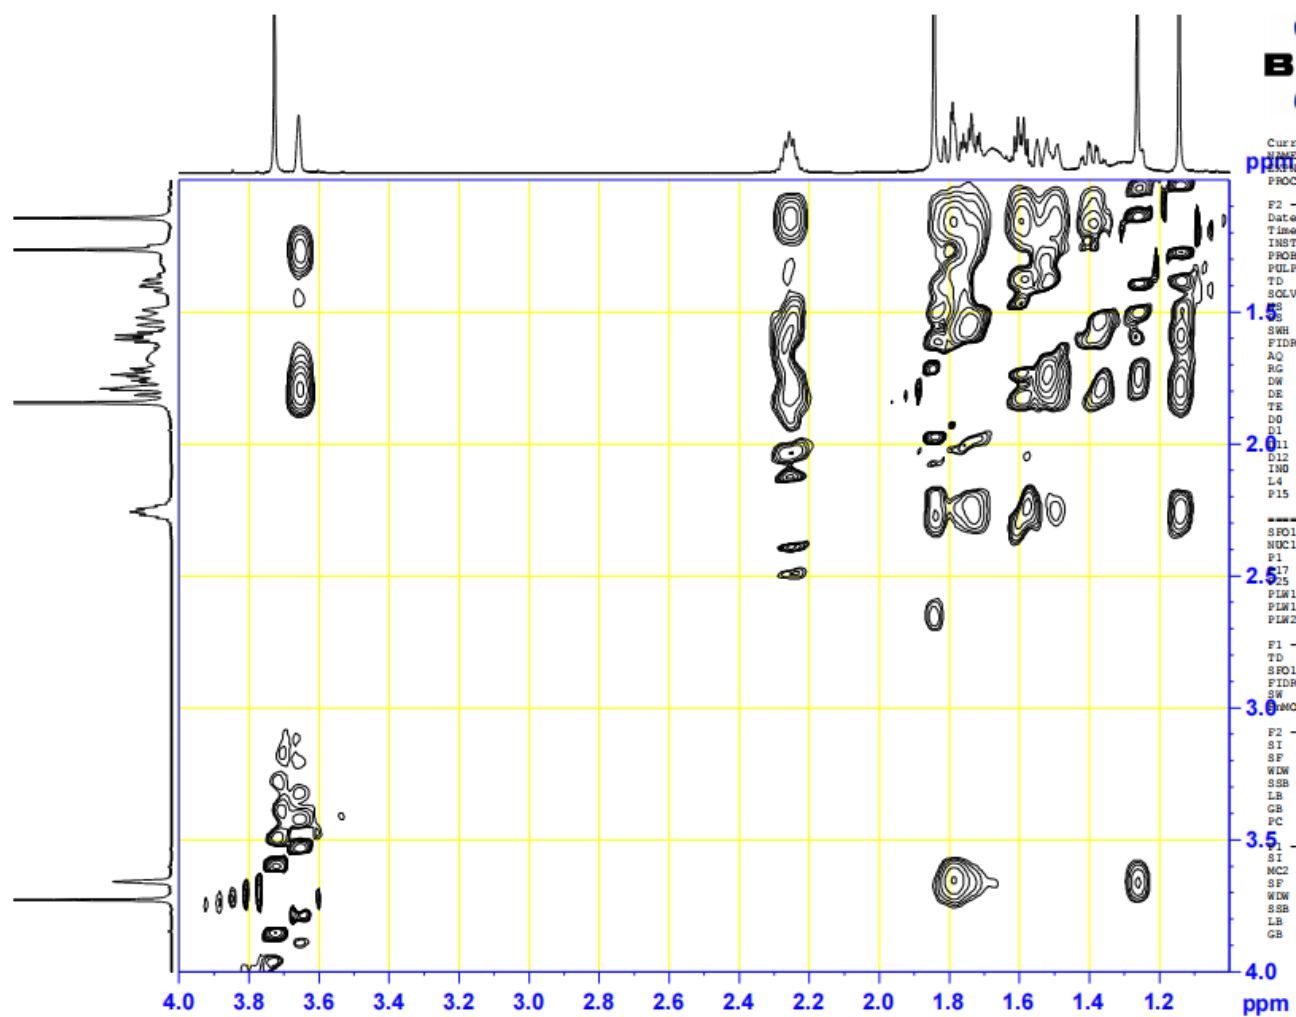

Fig. S60 ROESY Spectrum of **4** in chloroform-*d* (600 MHz) (expanded).

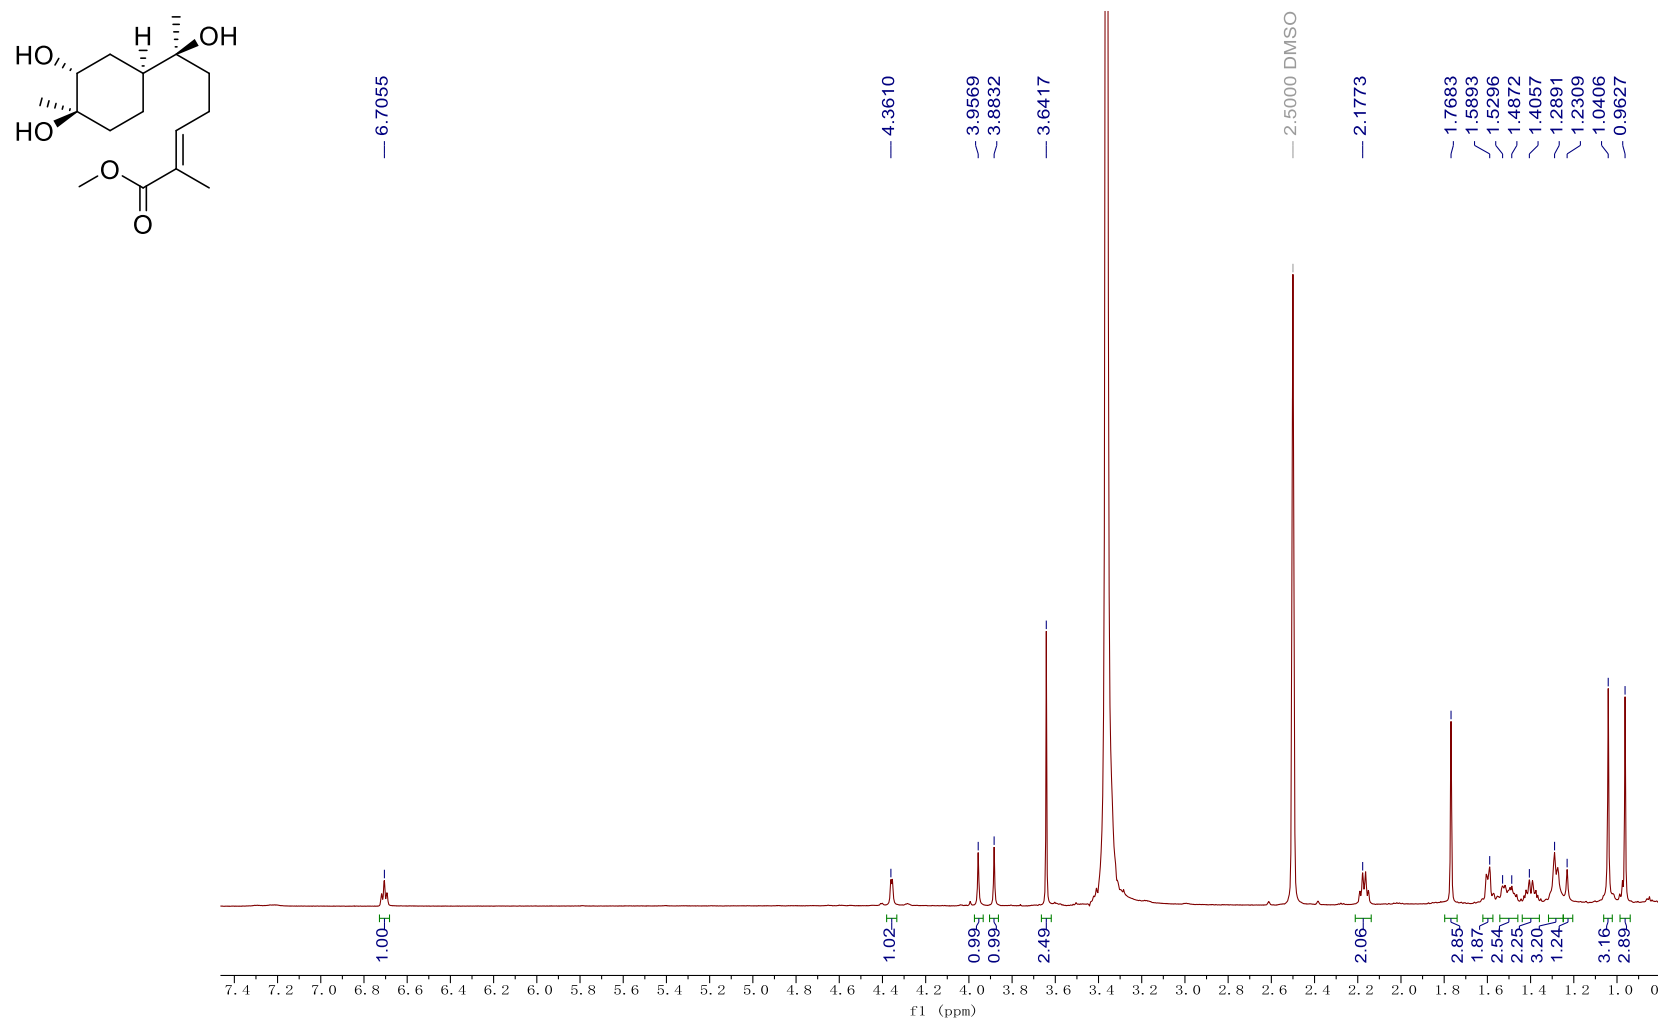

**Fig. S61** <sup>1</sup>H NMR Spectrum of **4** in DMSO-*d*<sub>6</sub> (600 MHz).

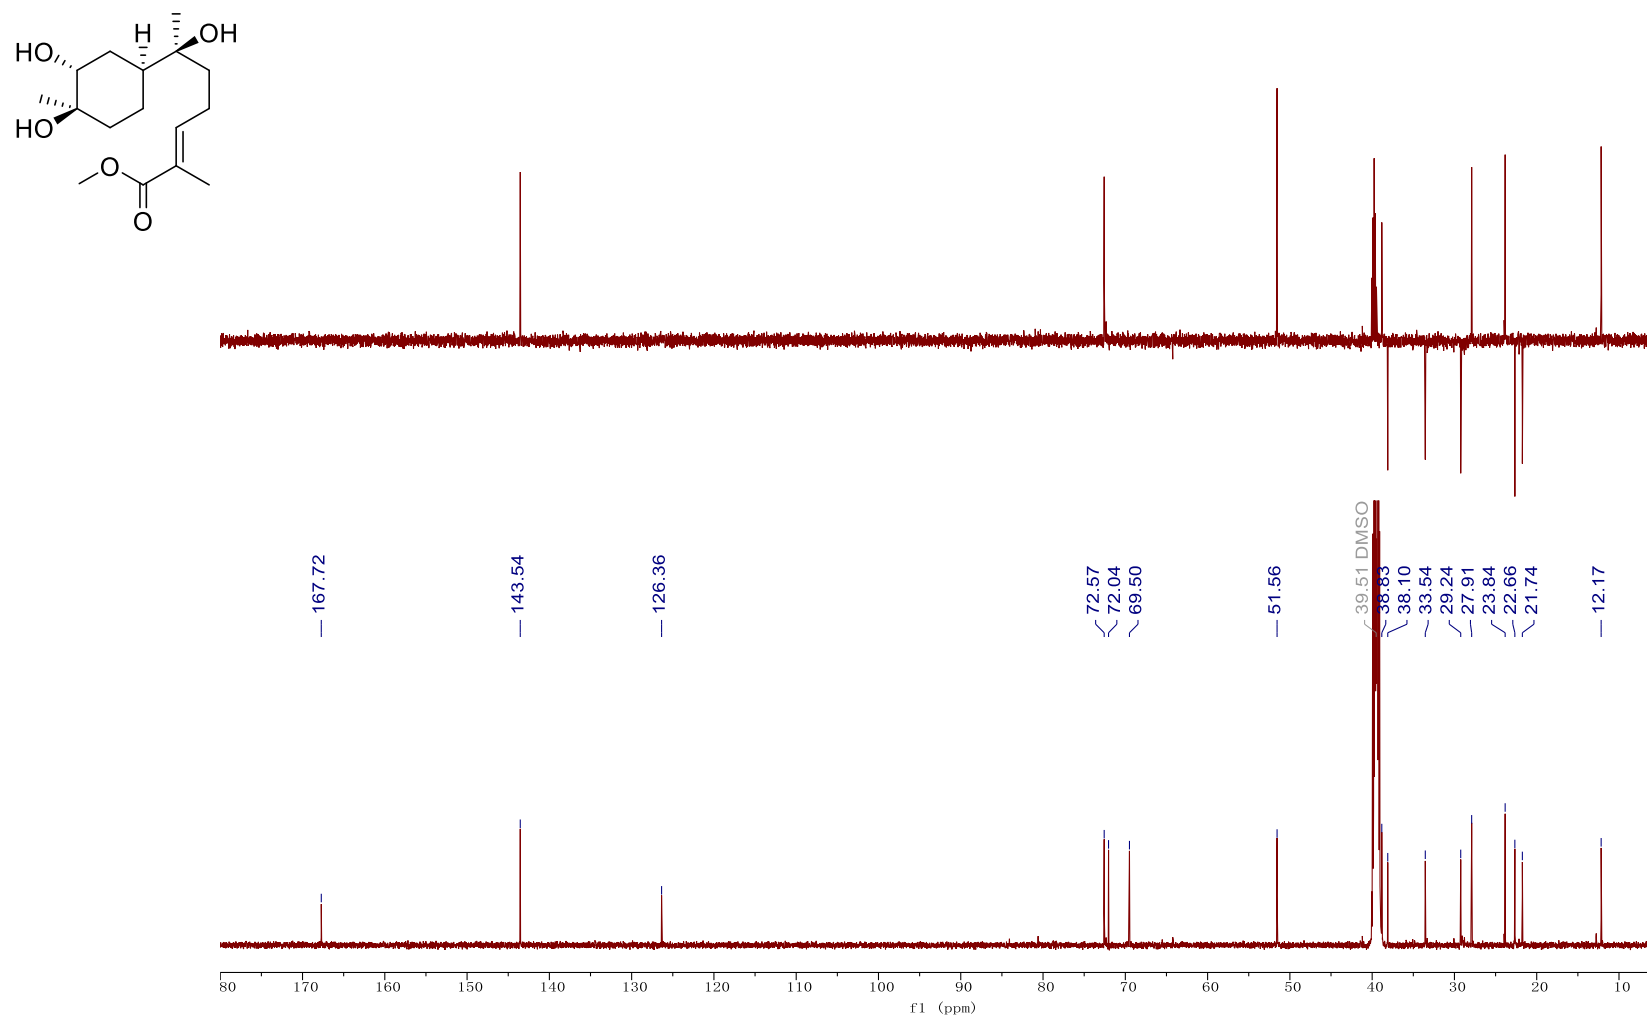

**Fig. S62**  $^{13}\text{C}$  NMR Spectrum of **4** in  $\text{DMSO-}d_6$  (150 MHz).

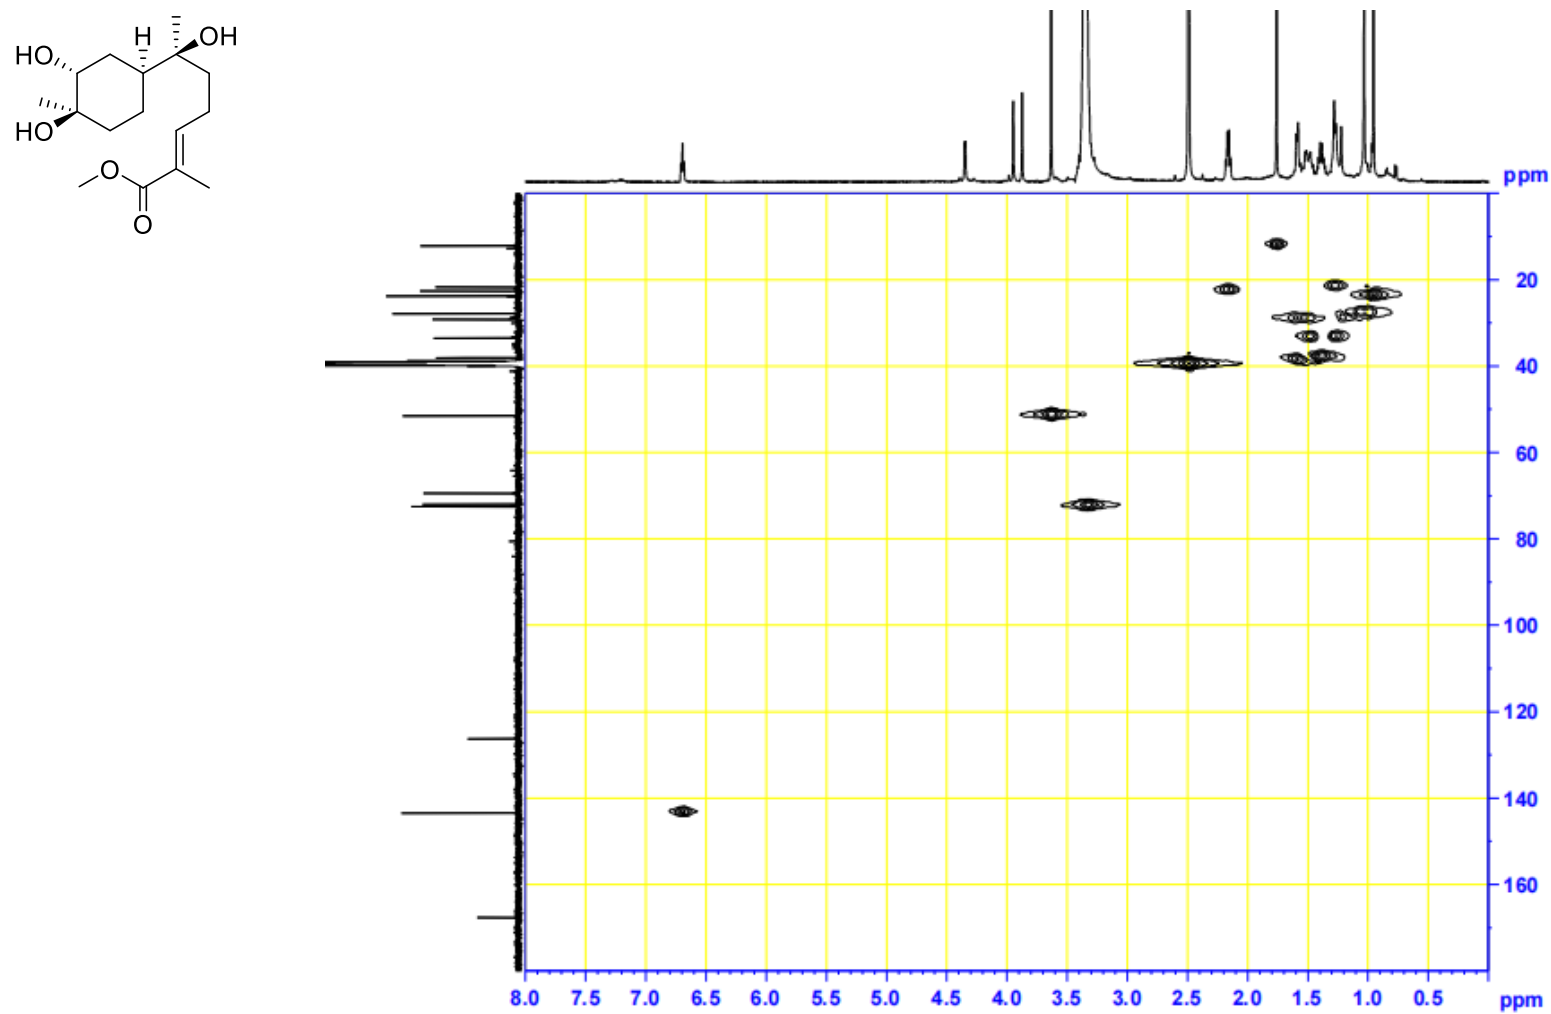

**Fig. S63** HSQC Spectrum of **4** in DMSO-*d*<sub>6</sub> (600 MHz).

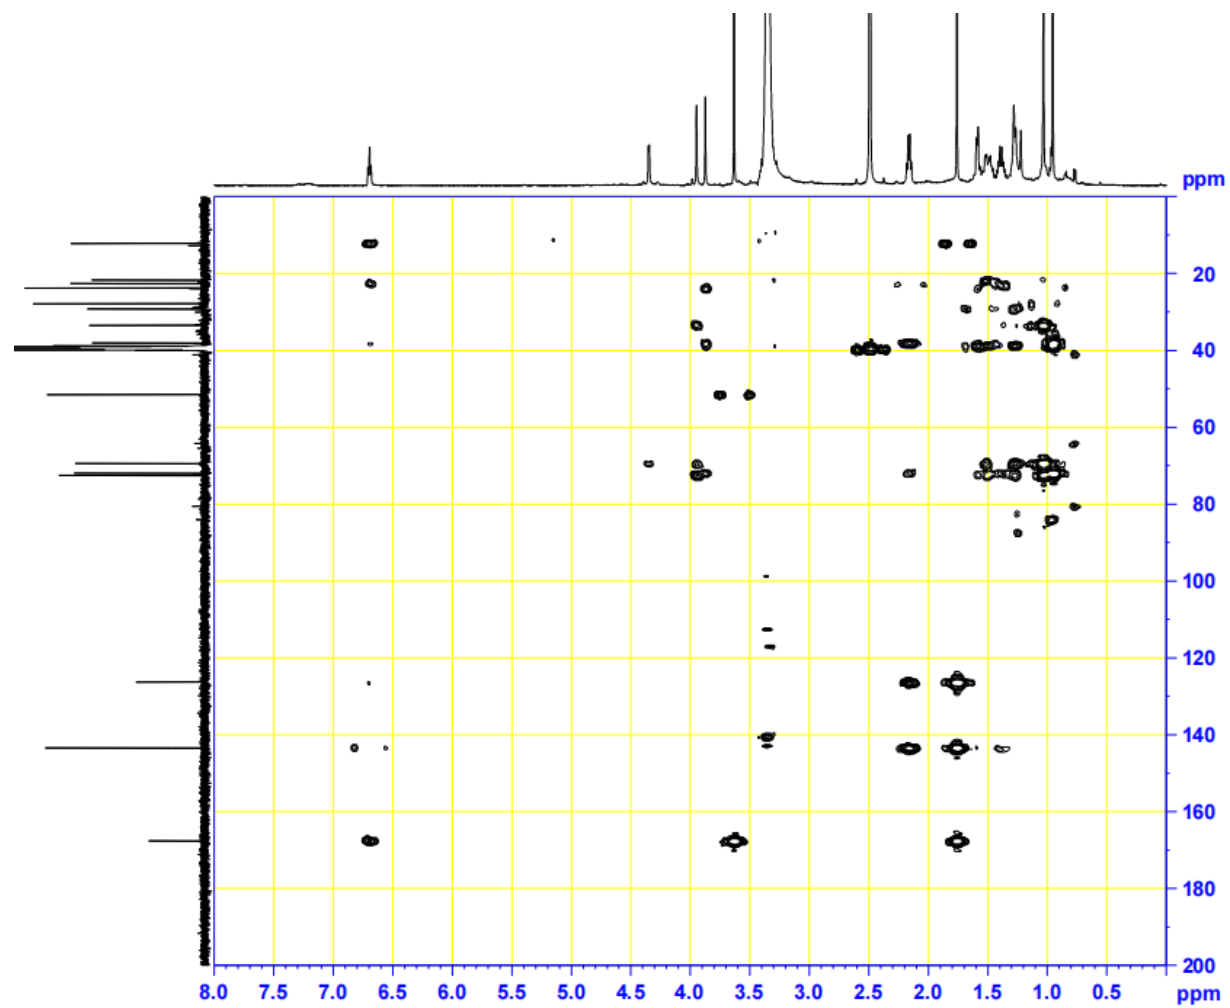

Fig. S64 HMBC Spectrum of **4** in DMSO- $d_6$  (600 MHz)

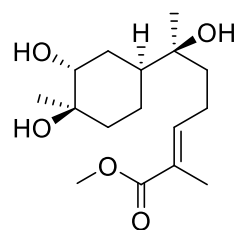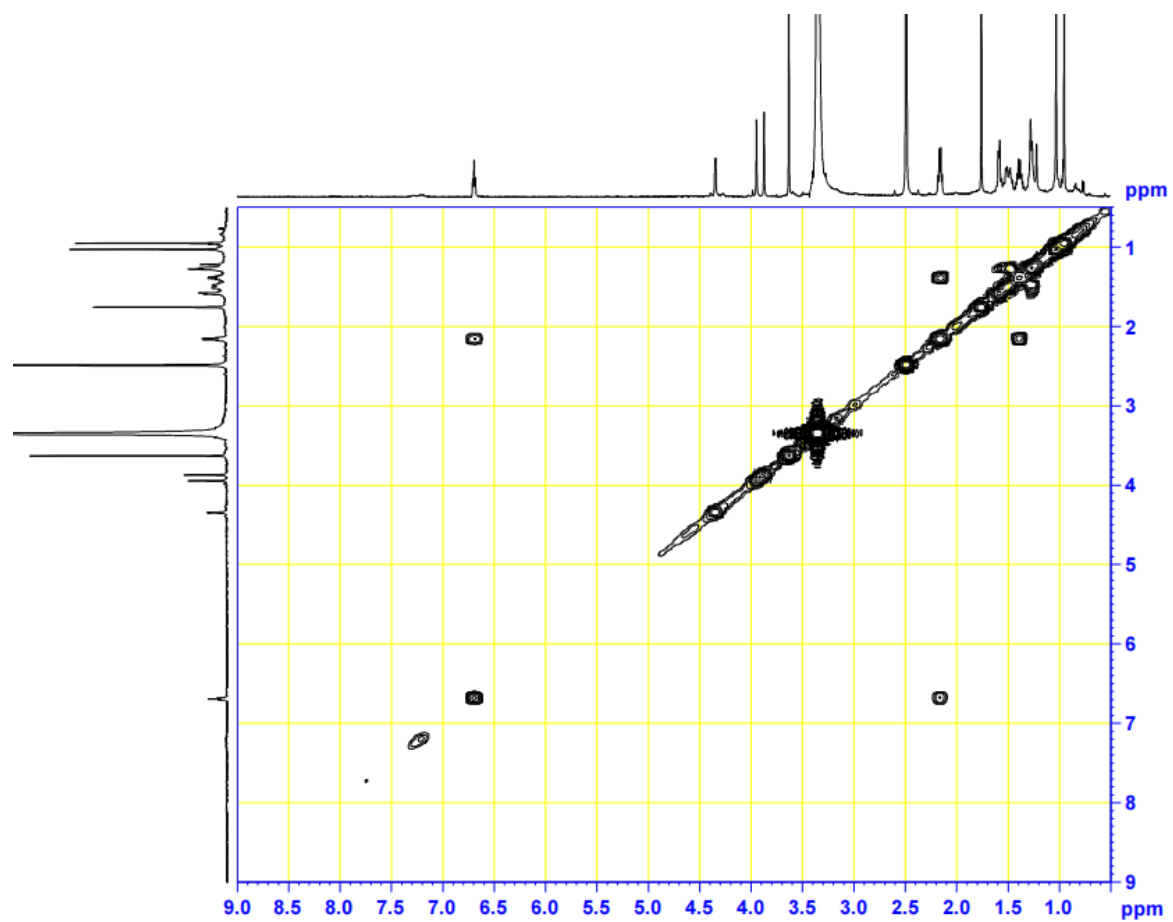

**Fig. S65**  $^1\text{H}$ - $^1\text{H}$  COSY Spectrum of **4** in  $\text{DMSO}-d_6$  (600 MHz).

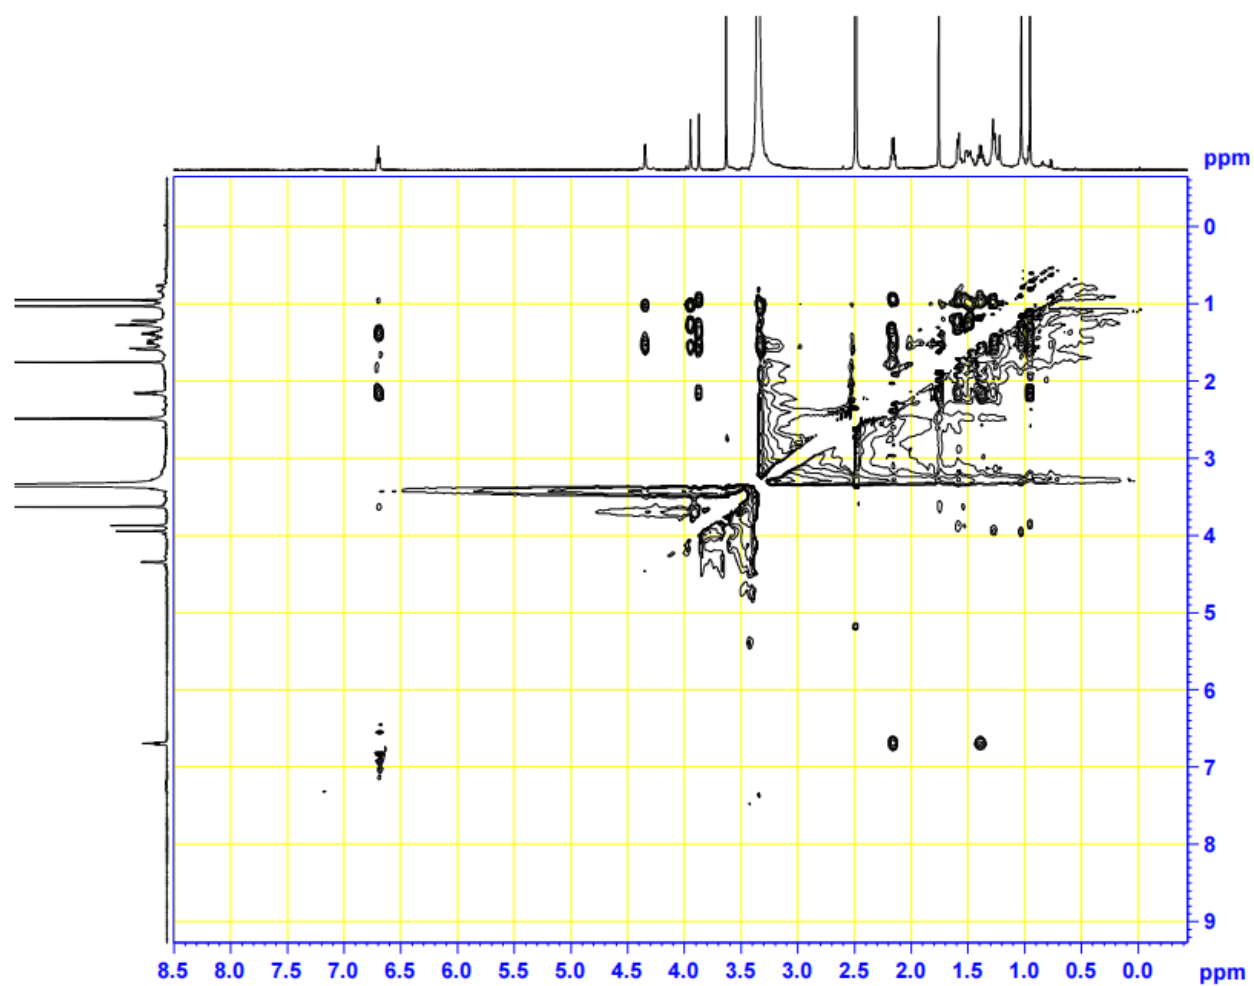

**Fig. S66** ROESY Spectrum of **4** in DMSO- $d_6$  (600 MHz).

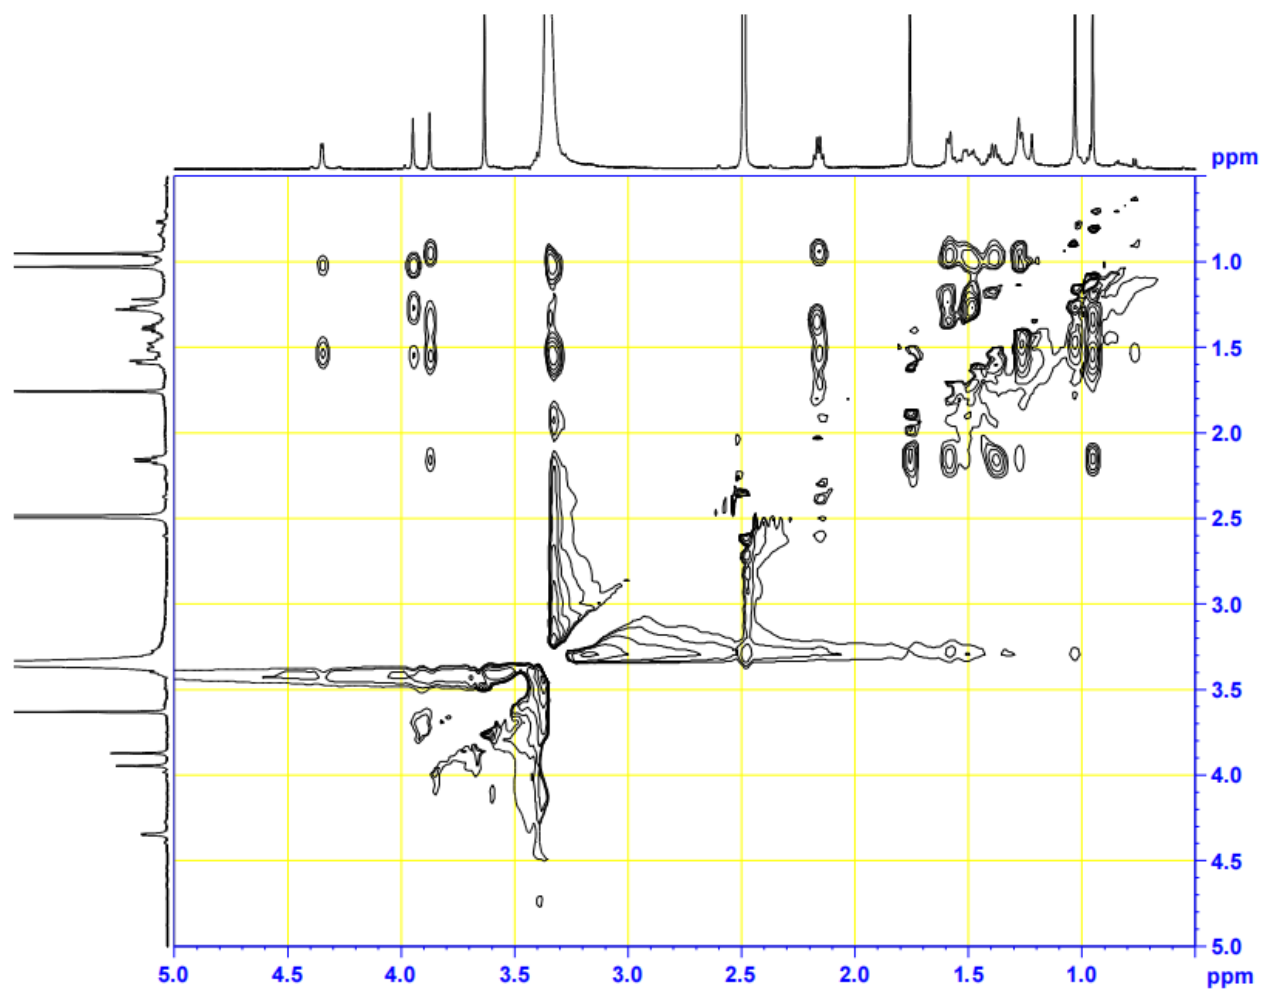

**Fig. S67** ROESY Spectrum of **4** in DMSO-*d*<sub>6</sub> (600 MHz) (expanded).



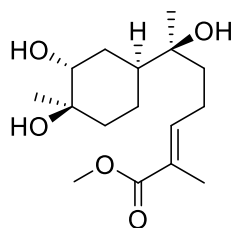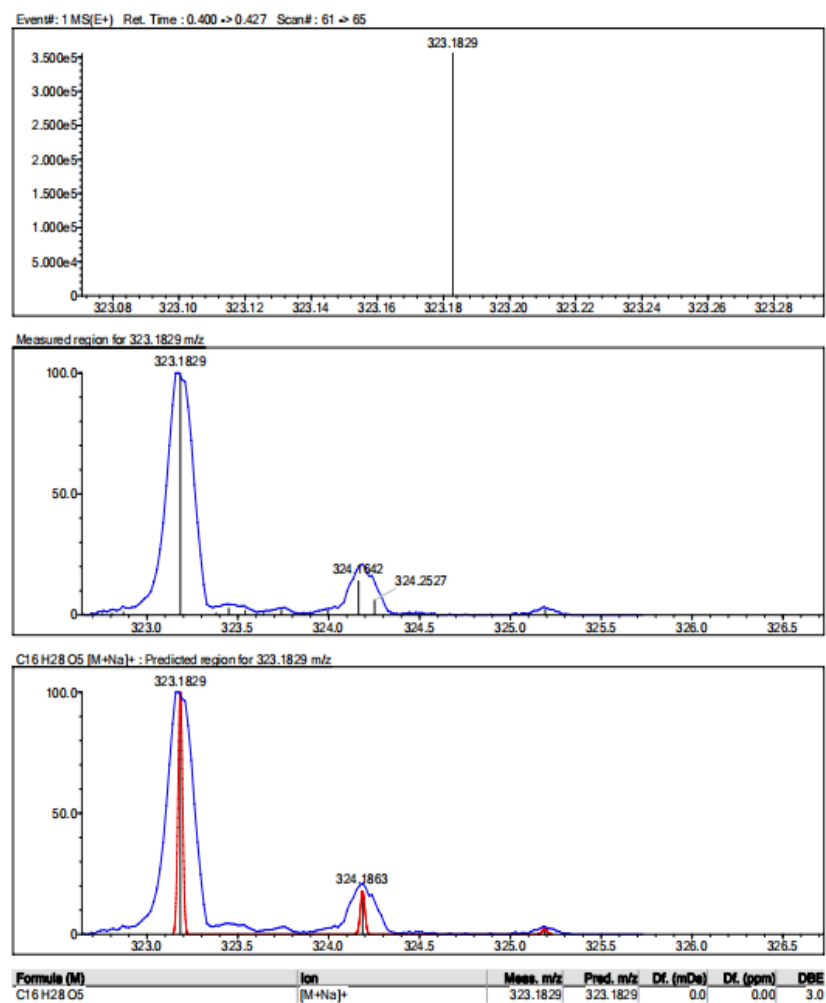

Fig. S68 HRESIMS Spectrum of 4.

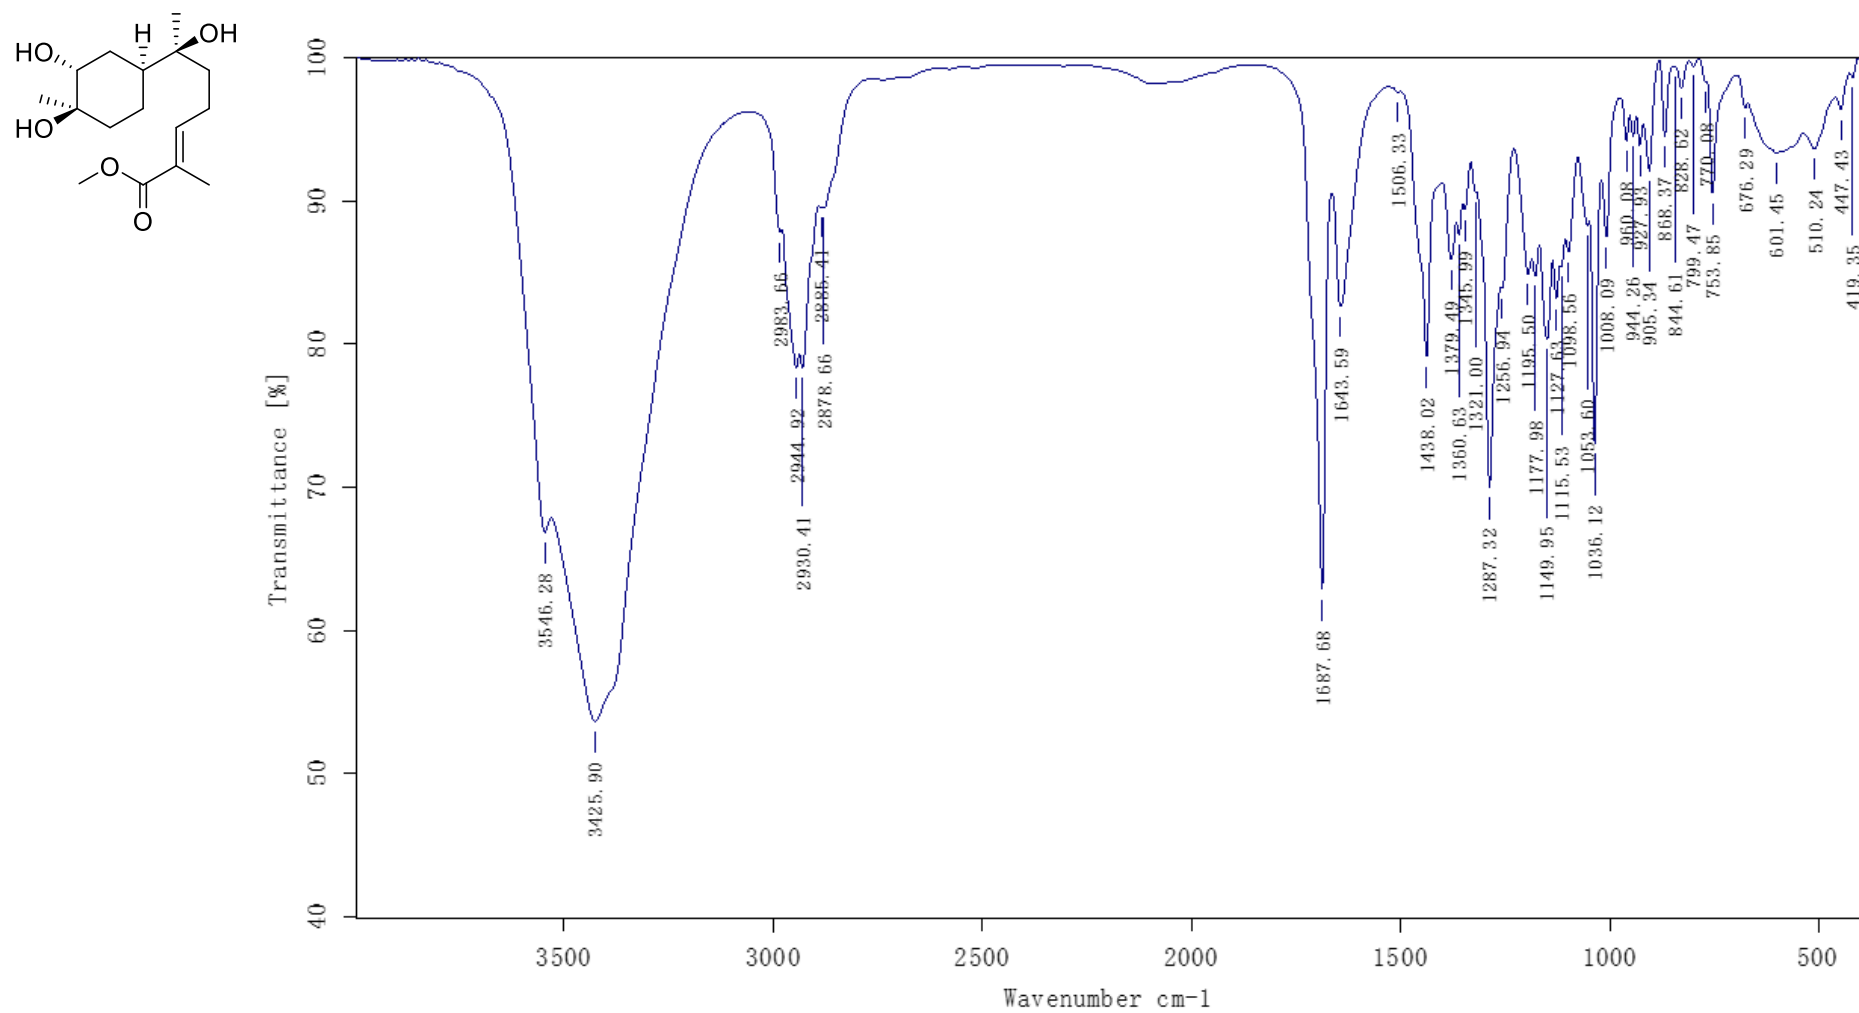

Fig. S69 IR Spectrum of 4.

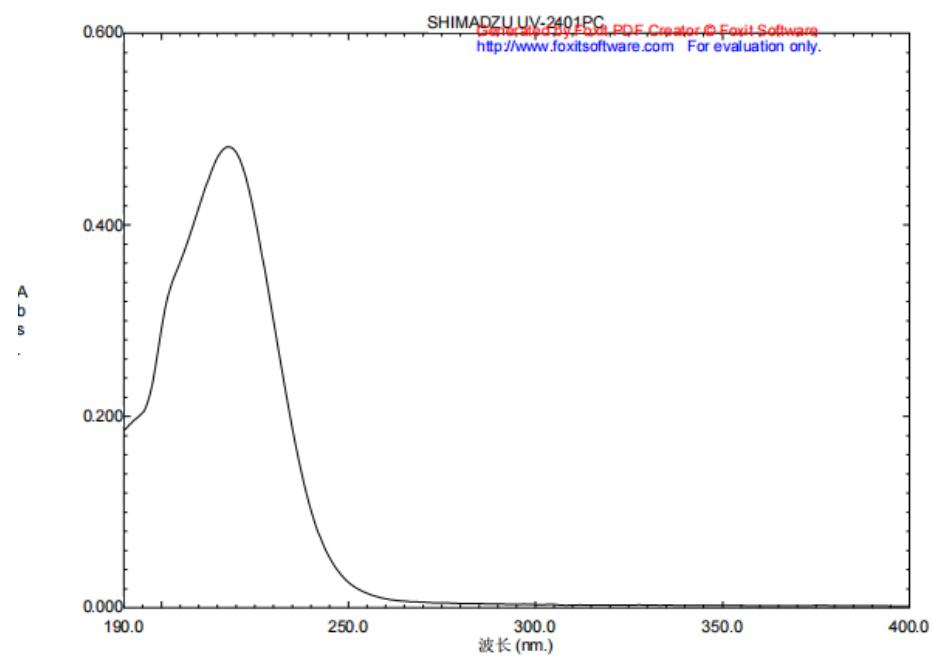

**Fig. S70** UV Spectrum of **4**.

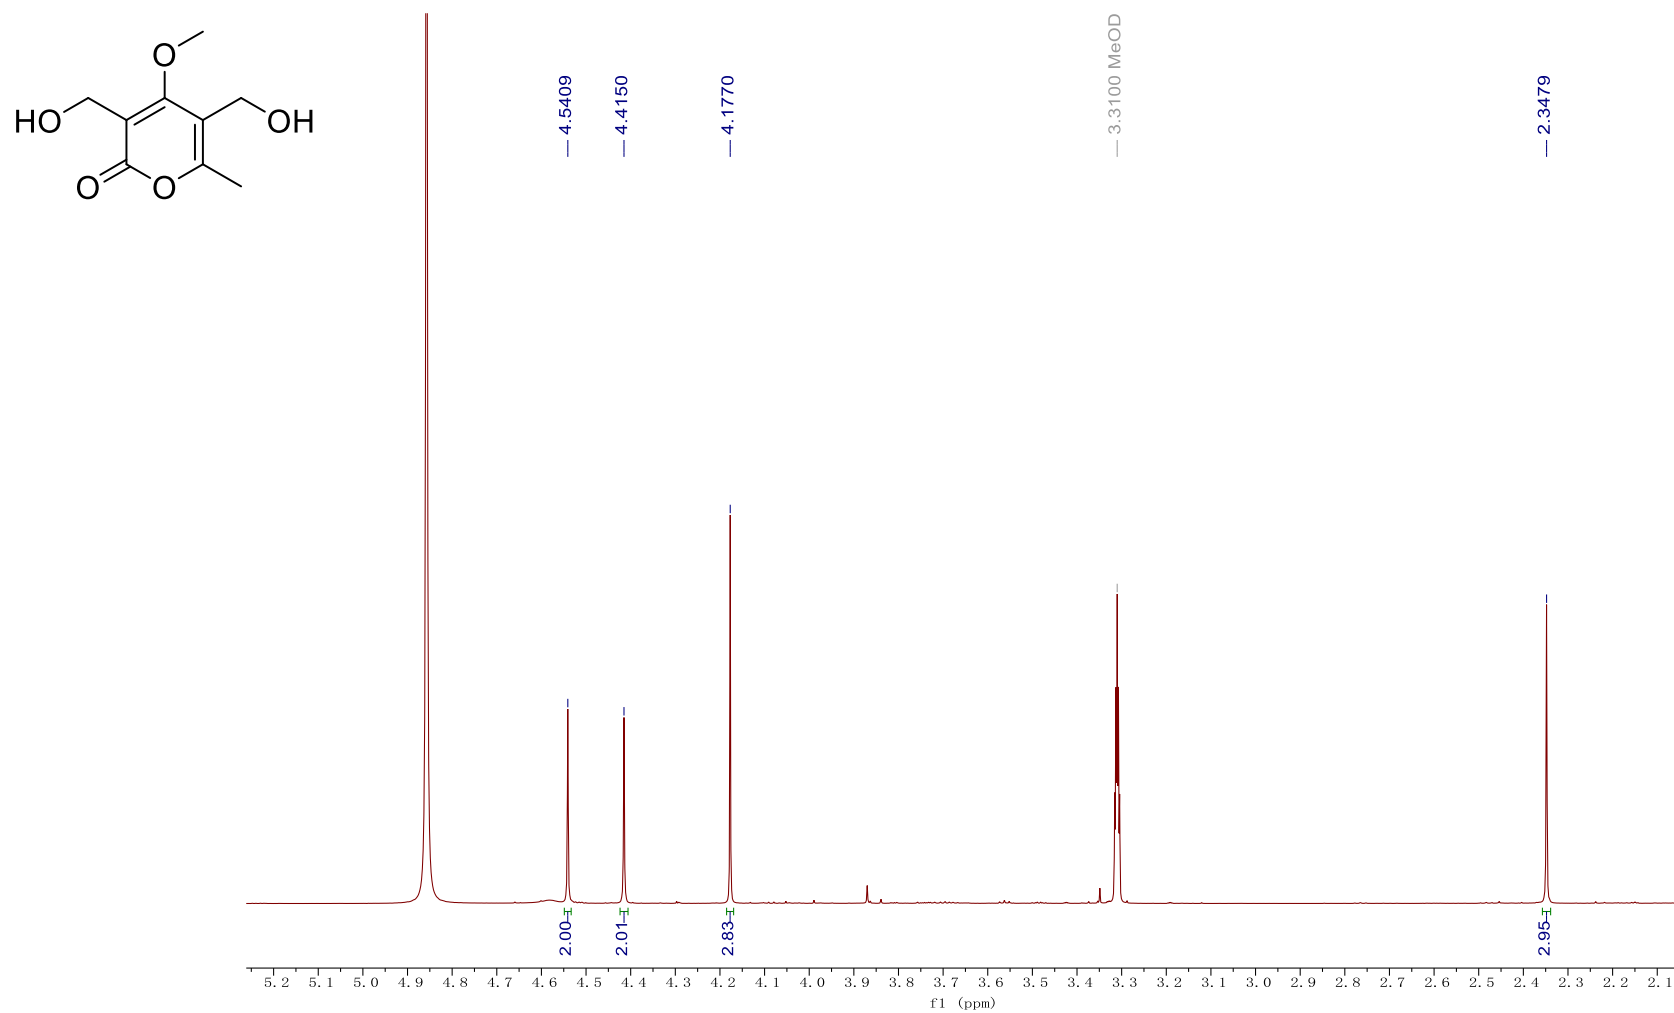

**Fig. S71**  $^1\text{H}$  NMR Spectrum of **5** in methanol- $d_4$  (600 MHz).

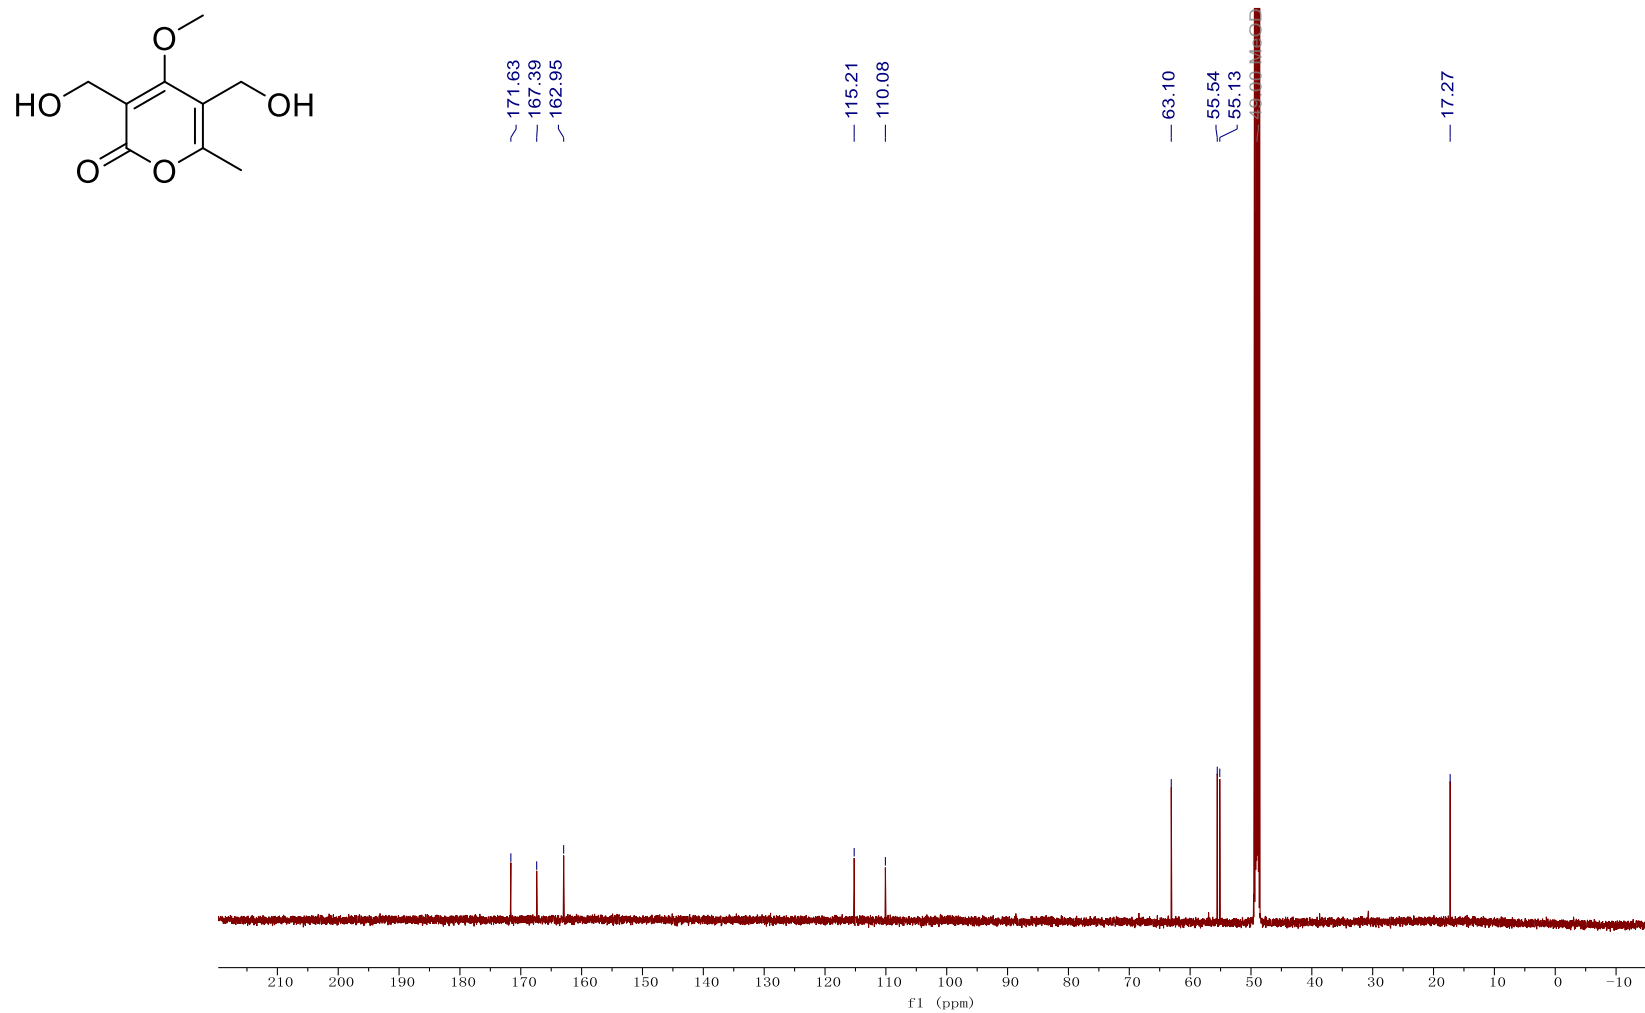

**Fig. S72**  $^{13}\text{C}$  NMR Spectrum of **5** in methanol- $d_4$  (150 MHz).

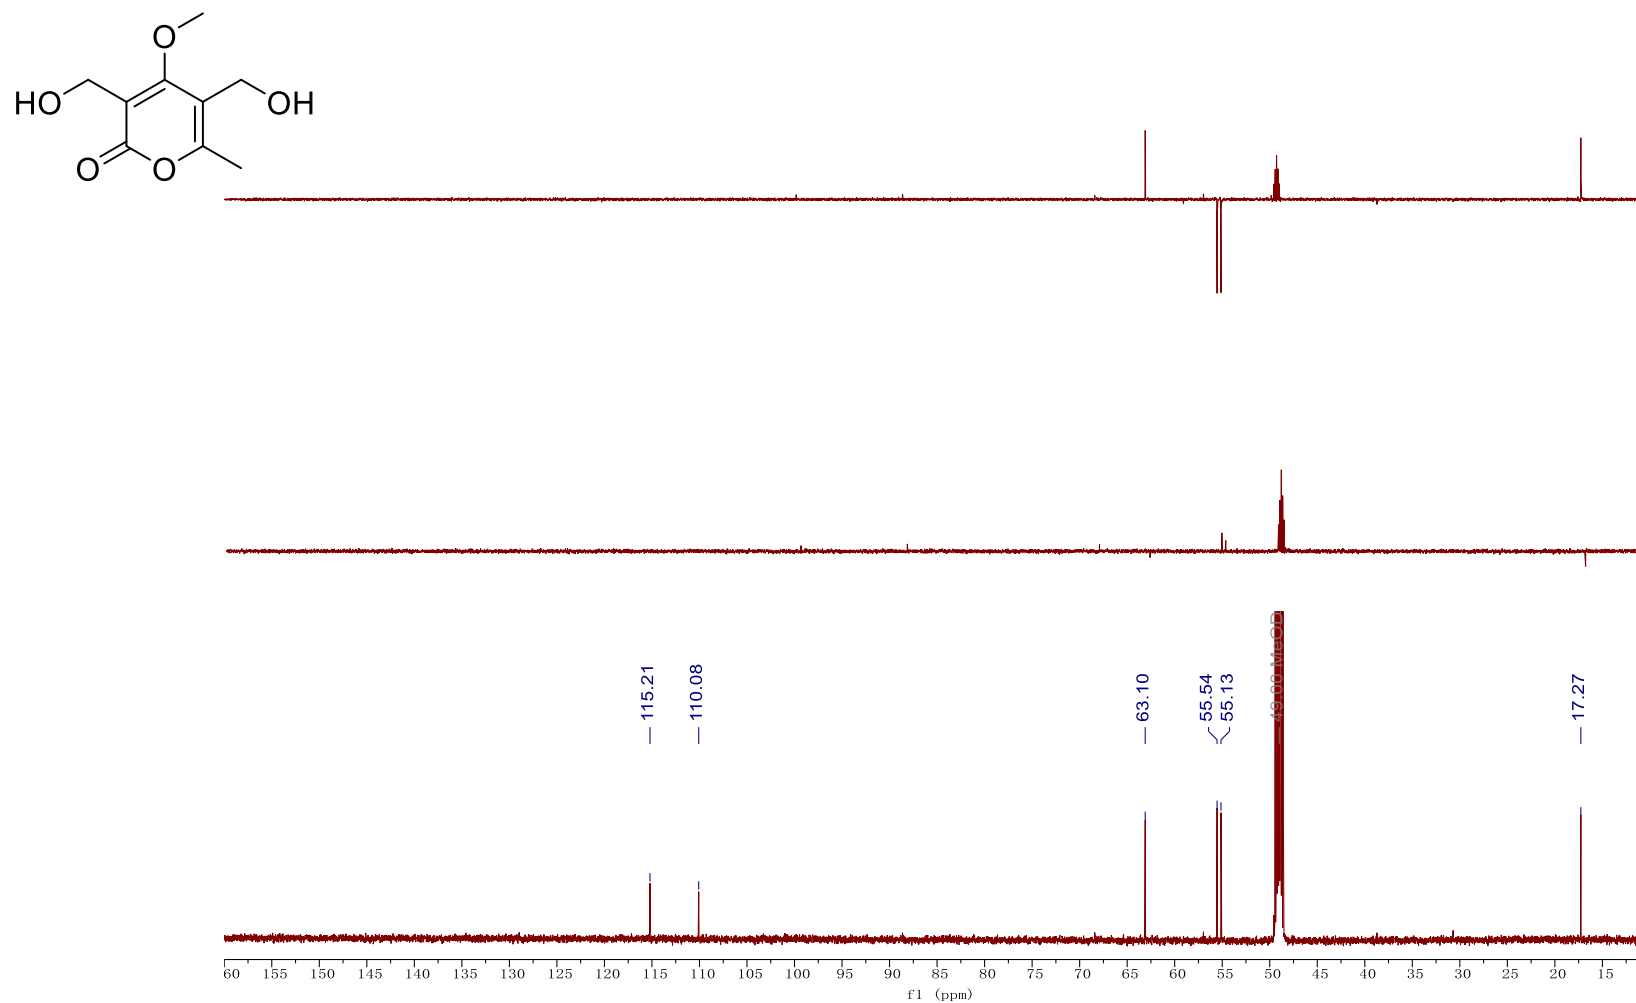

**Fig. S73** The DEPT Spectrum of **5** in methanol-*d*<sub>4</sub> (150 MHz).

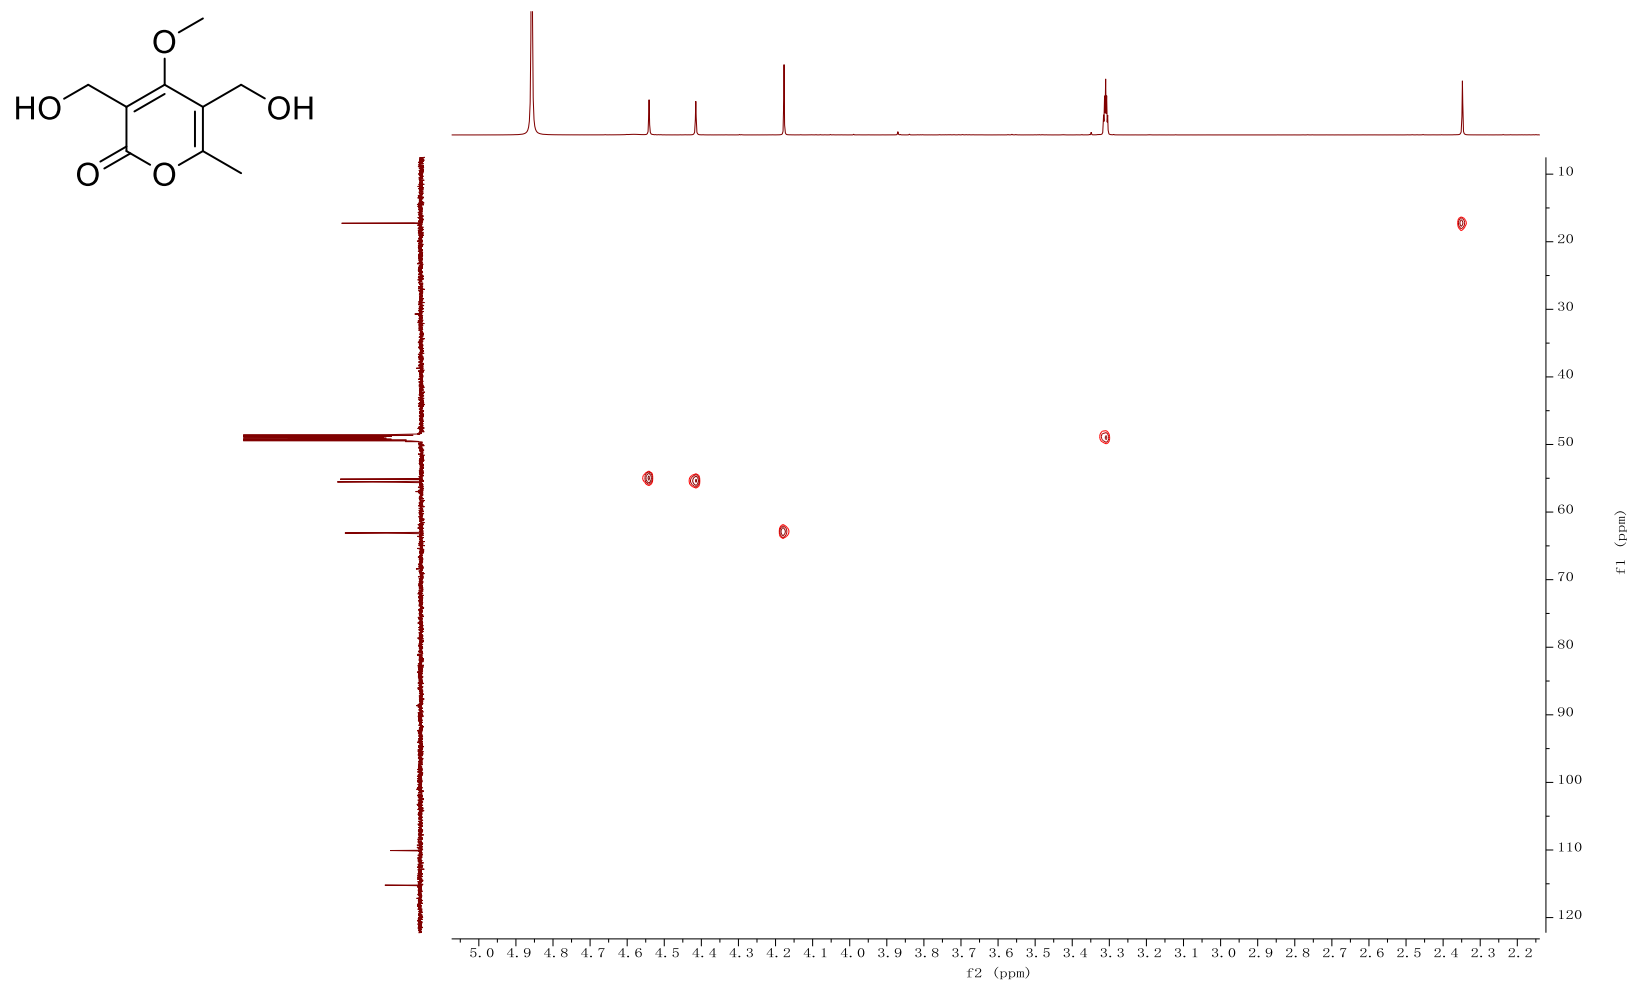

**Fig. S74** HSQC Spectrum of **5** in methanol-*d*<sub>4</sub> (600 MHz).

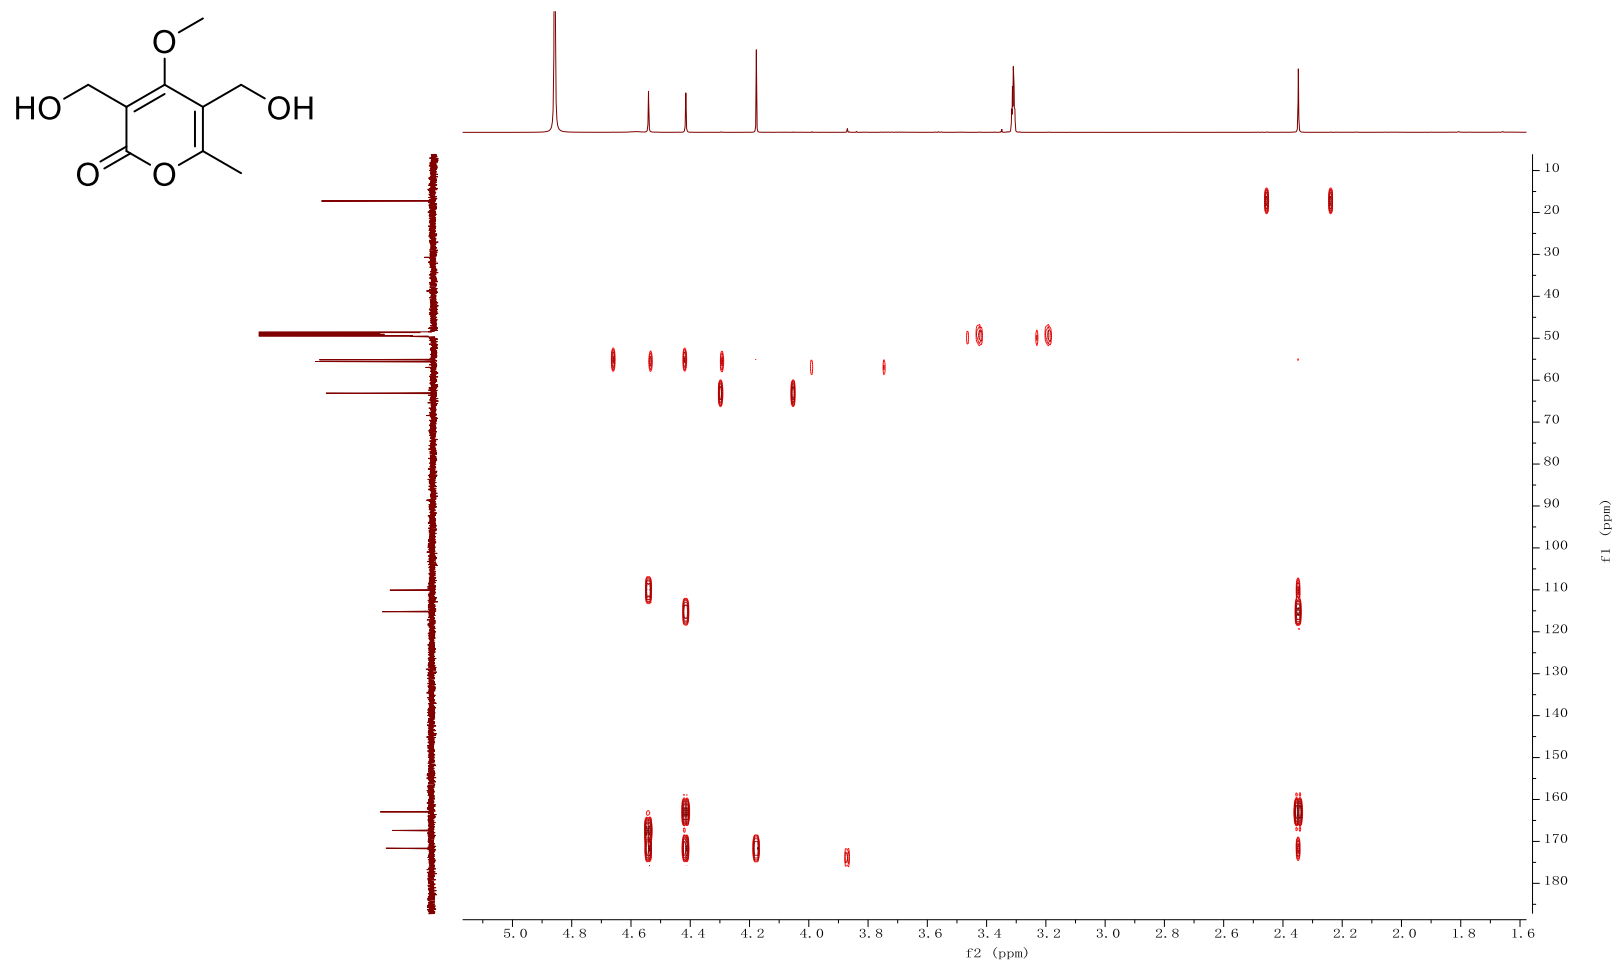

**Fig. S75** HMBC Spectrum of **5** in methanol-*d*<sub>4</sub> (600 MHz).



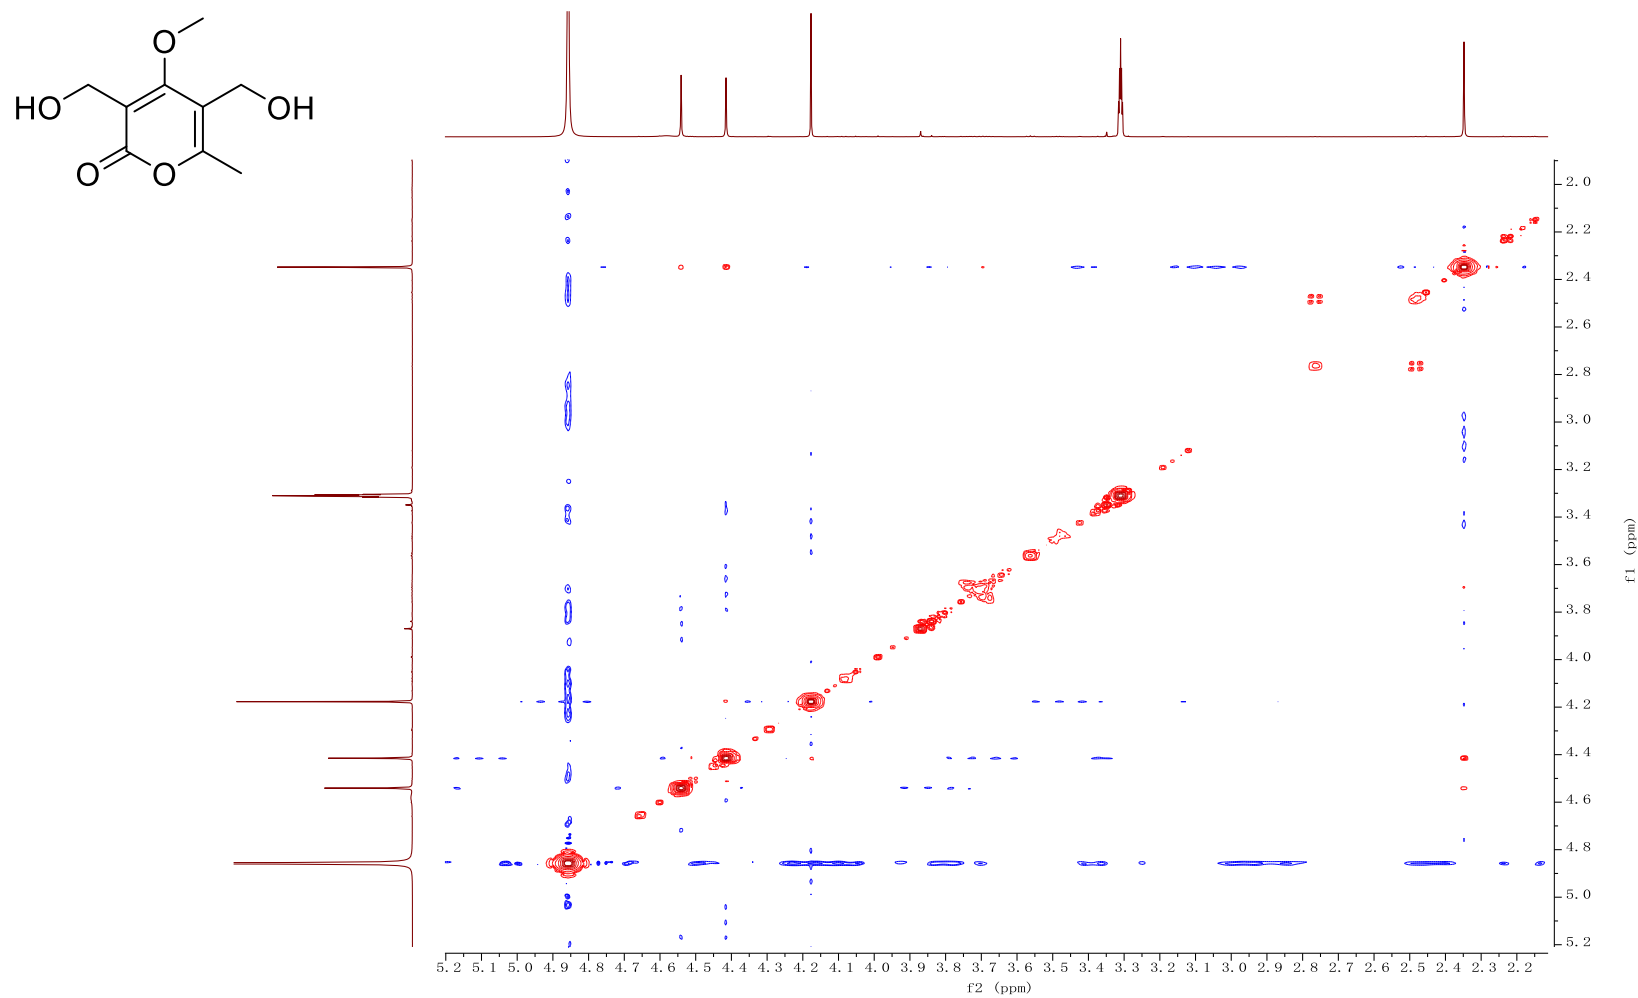

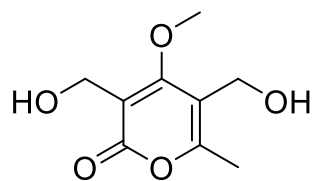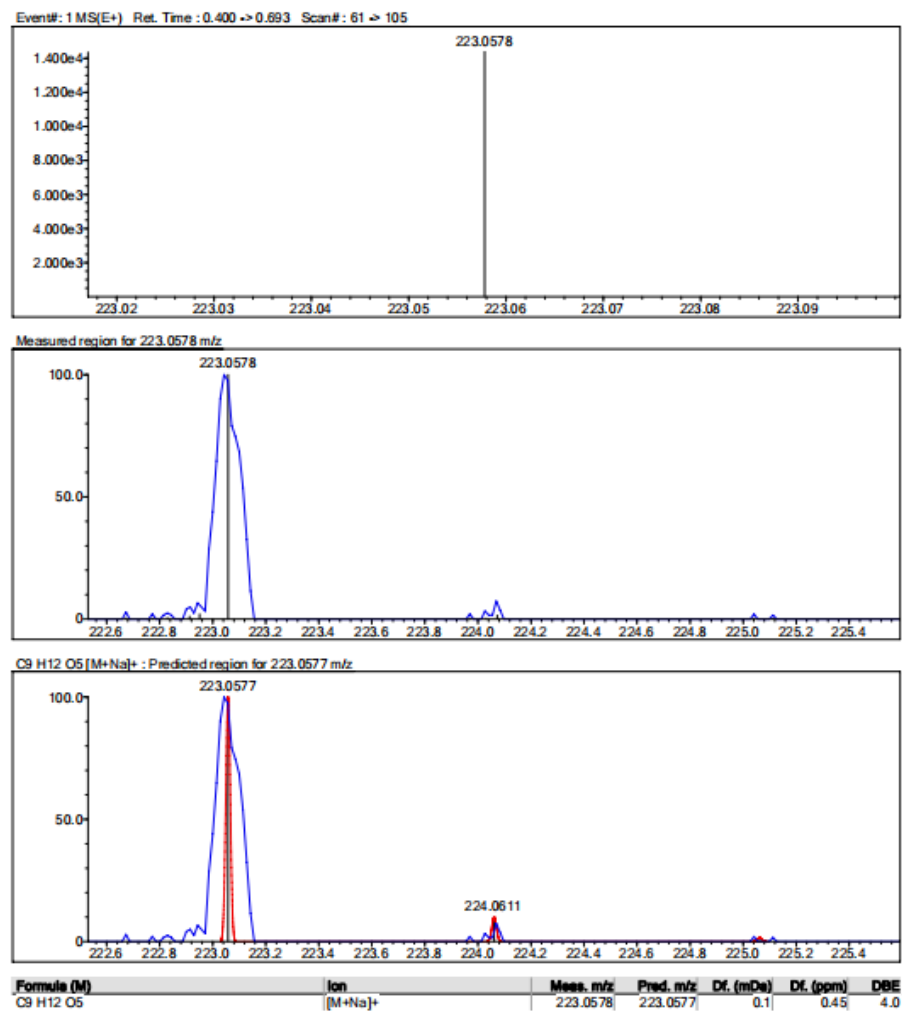

Fig. S77 HRESIMS Spectrum of 5.

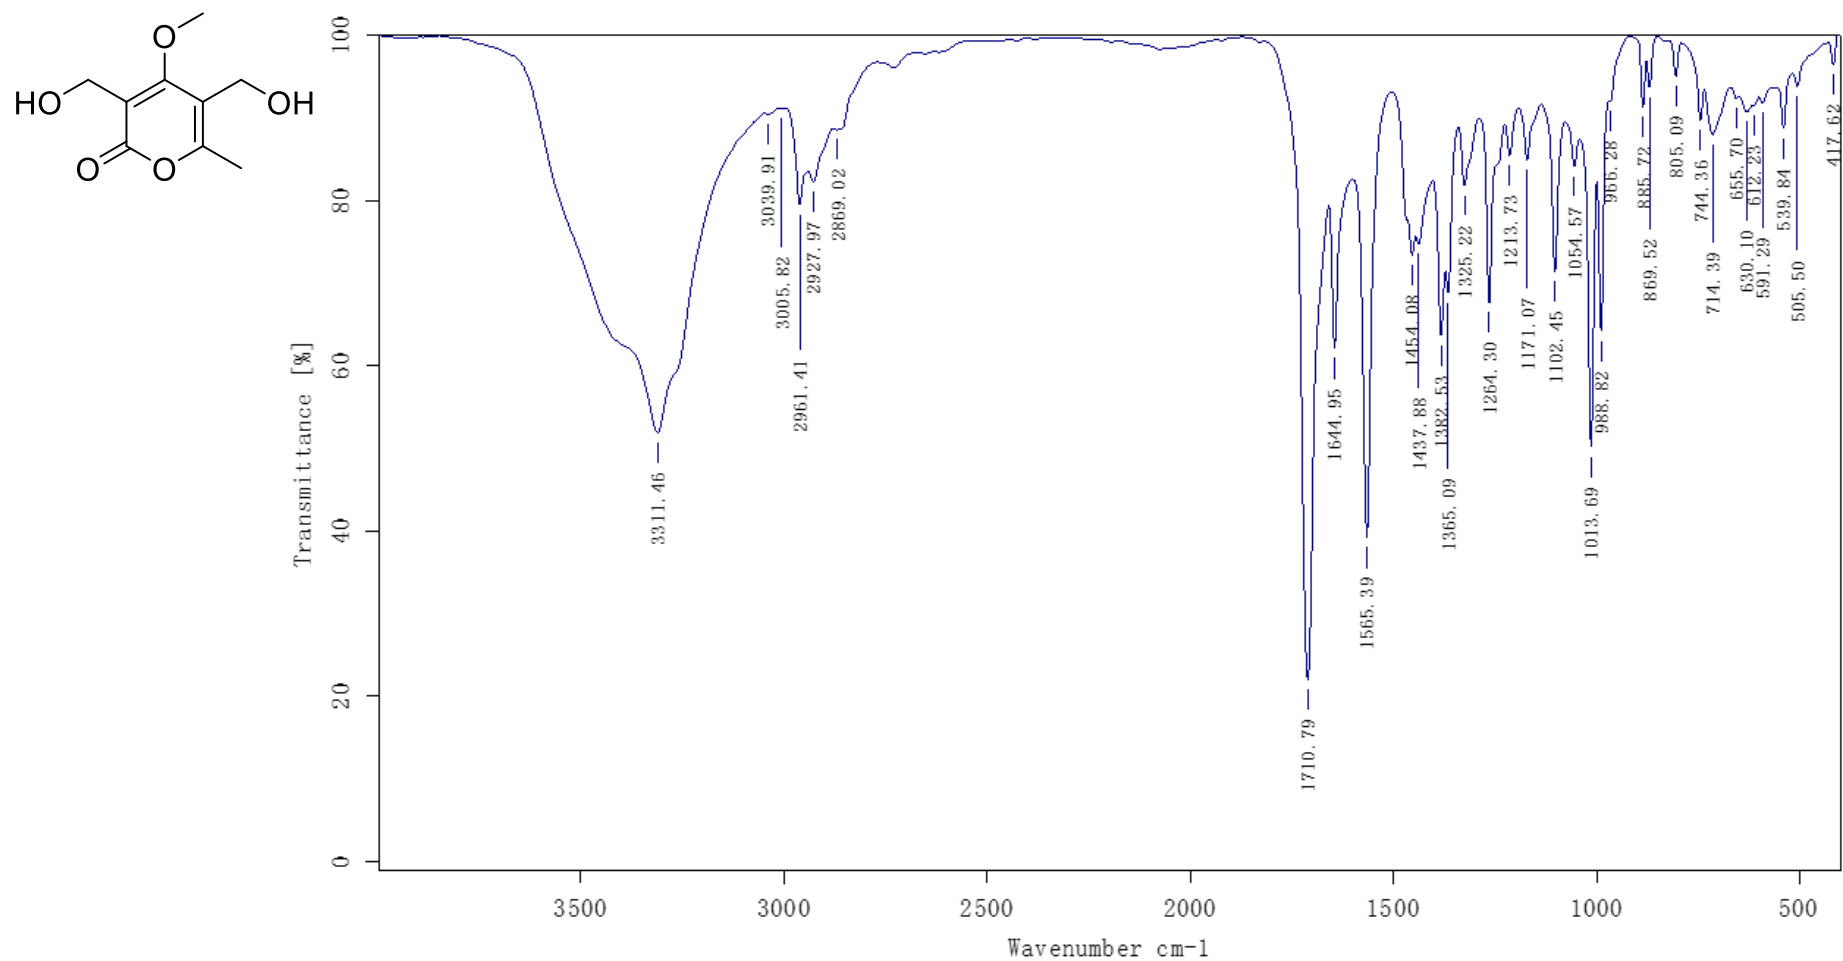

**Fig. S78** IR Spectrum of **5**.

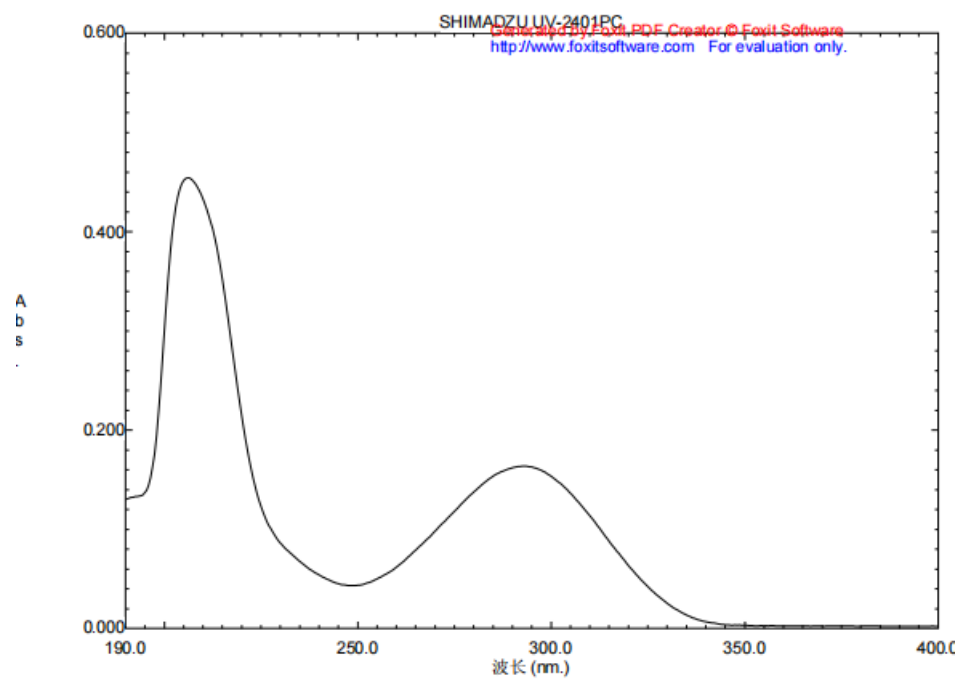

**Fig. S79** UV Spectrum of **5**.

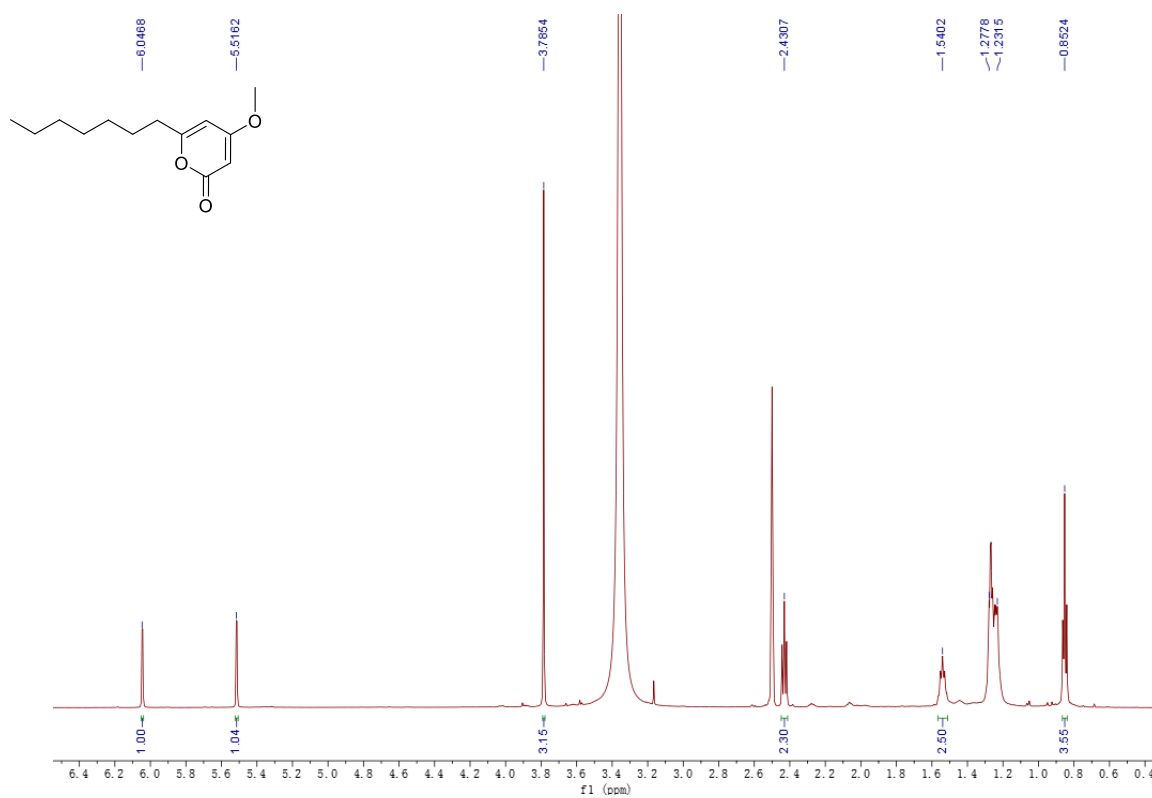

**Fig. S80** <sup>1</sup>H NMR spectrum of **6** in DMSO-*d*<sub>6</sub> (600 MHz).

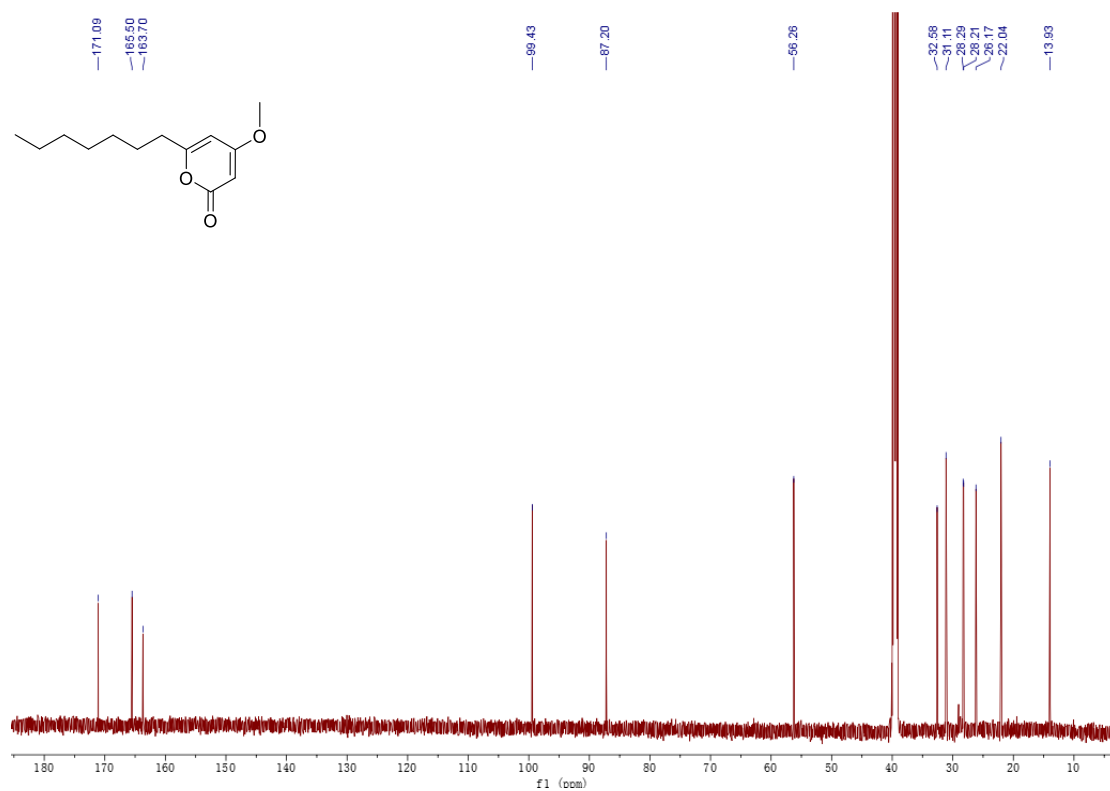

**Fig. S81** <sup>13</sup>C NMR spectrum of **6** in DMSO-*d*<sub>6</sub> (150 MHz).

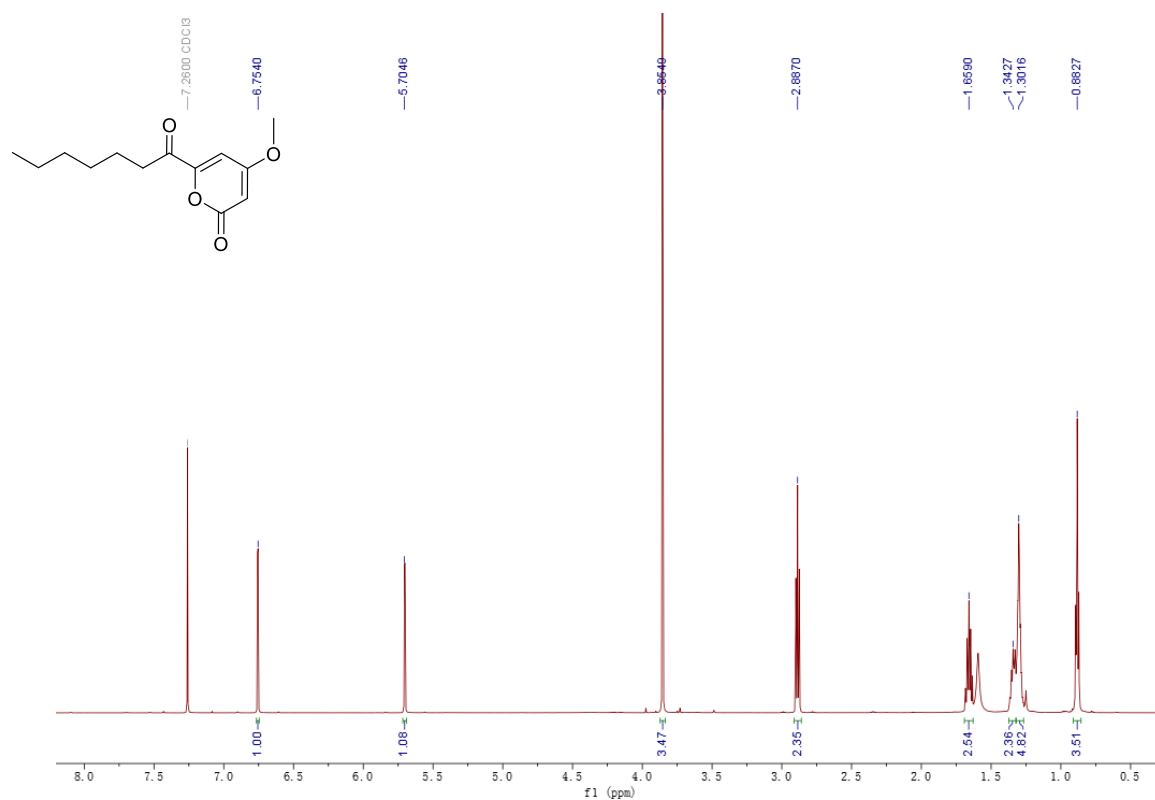

**Fig. S82** <sup>1</sup>H NMR spectrum of **7** in chloroform-*d* (600 MHz).

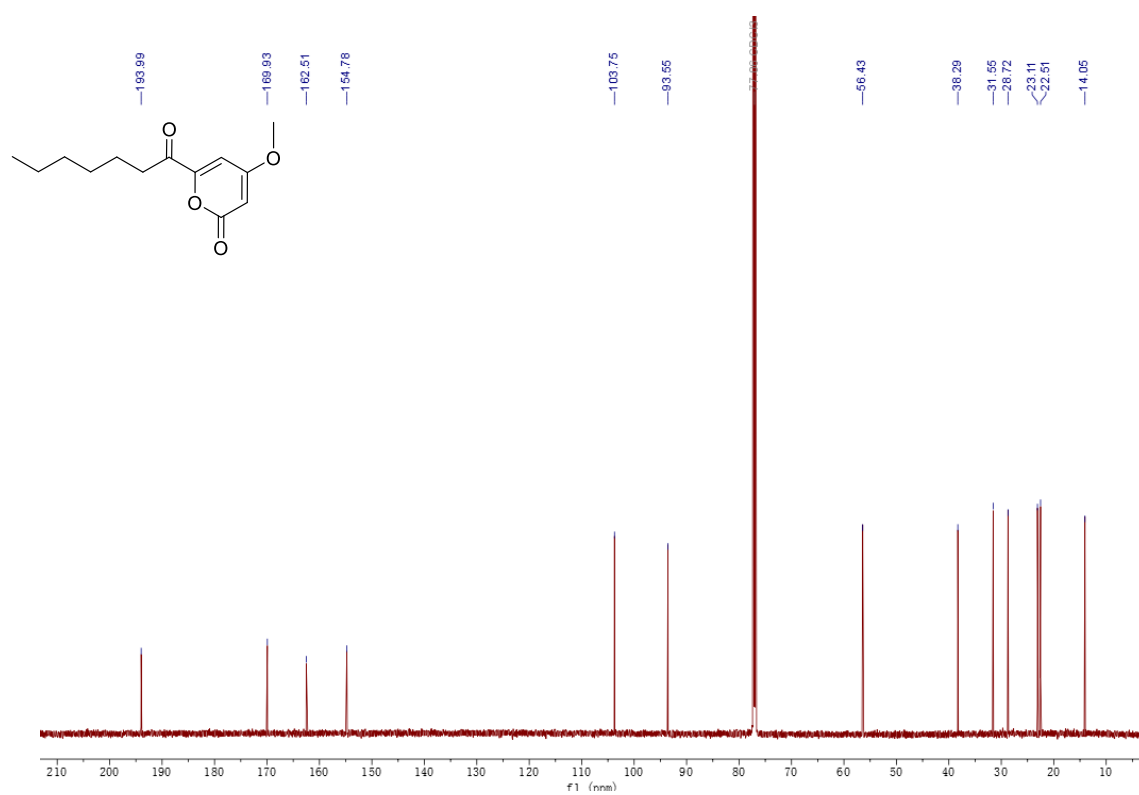

**Fig. S83** <sup>13</sup>C NMR spectrum of **7** in chloroform-*d* (150 MHz).

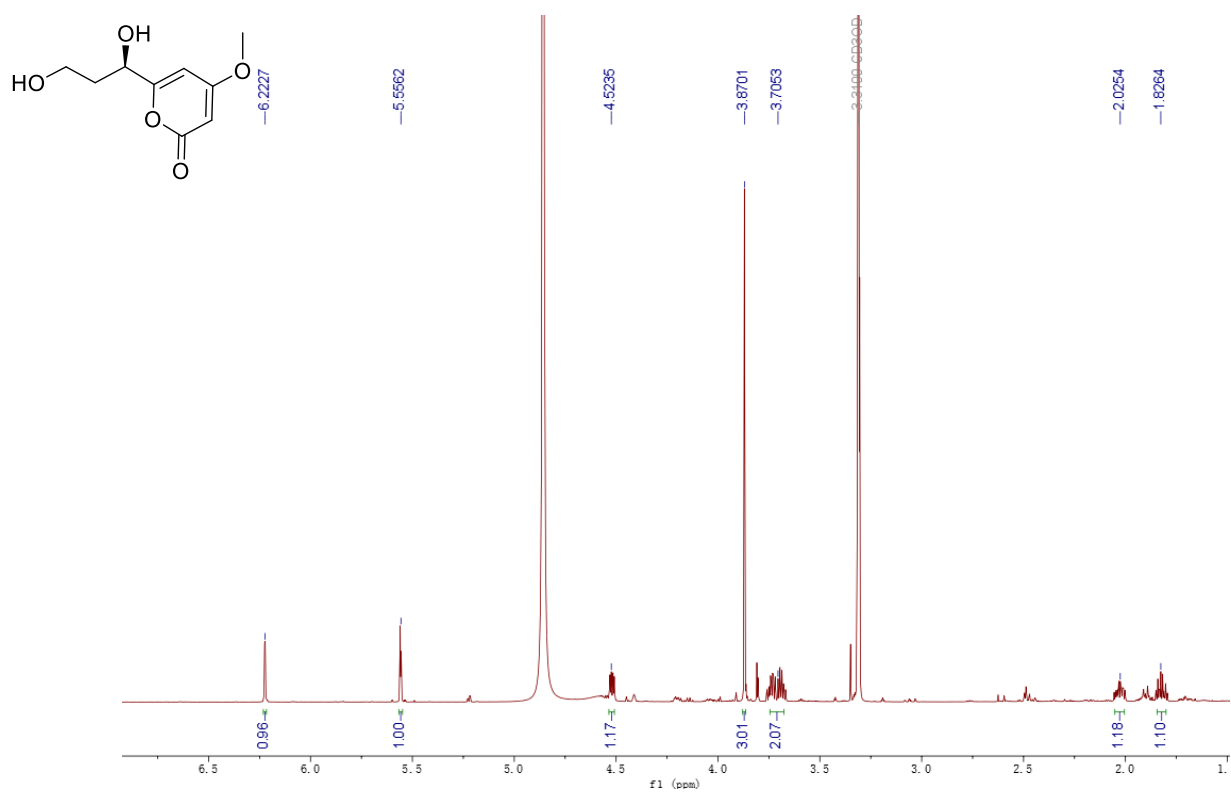

**Fig. S84** <sup>1</sup>H NMR spectrum of **8** in methanol-*d*<sub>4</sub> (600 MHz).

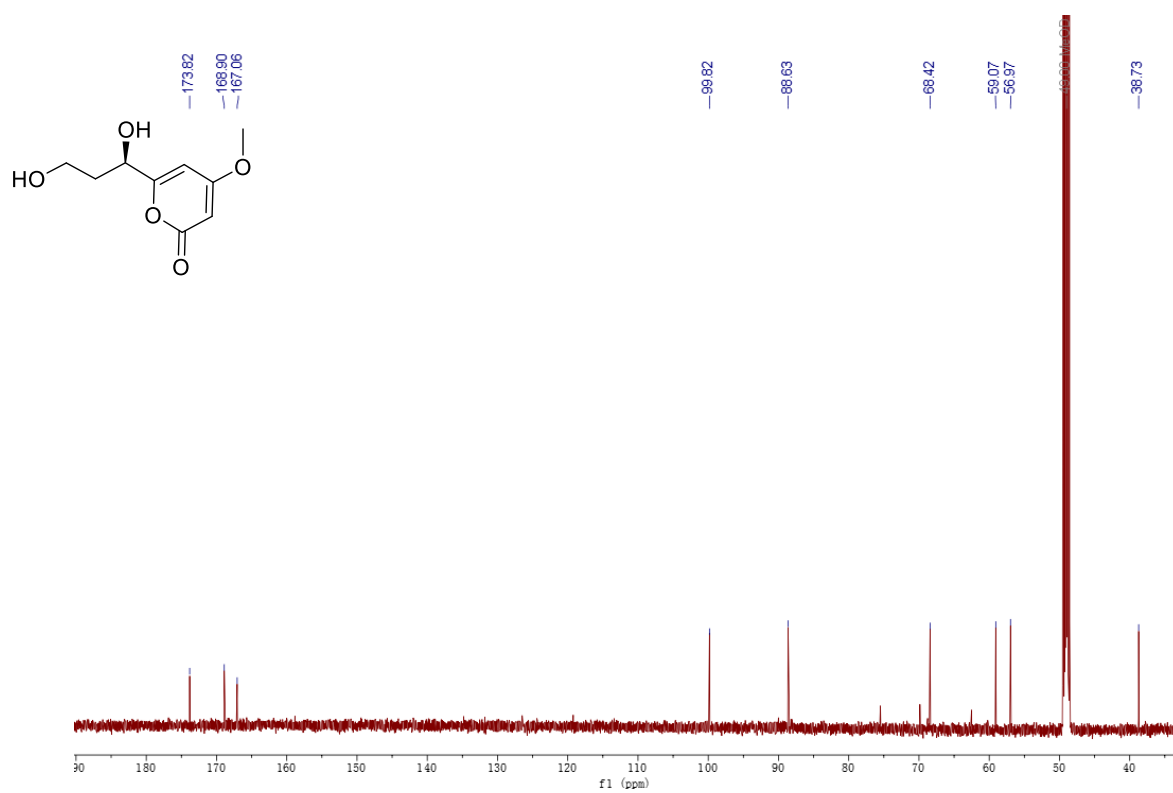

**Fig. S85** <sup>13</sup>C NMR spectrum of **8** in methanol-*d*<sub>4</sub> (150 MHz).

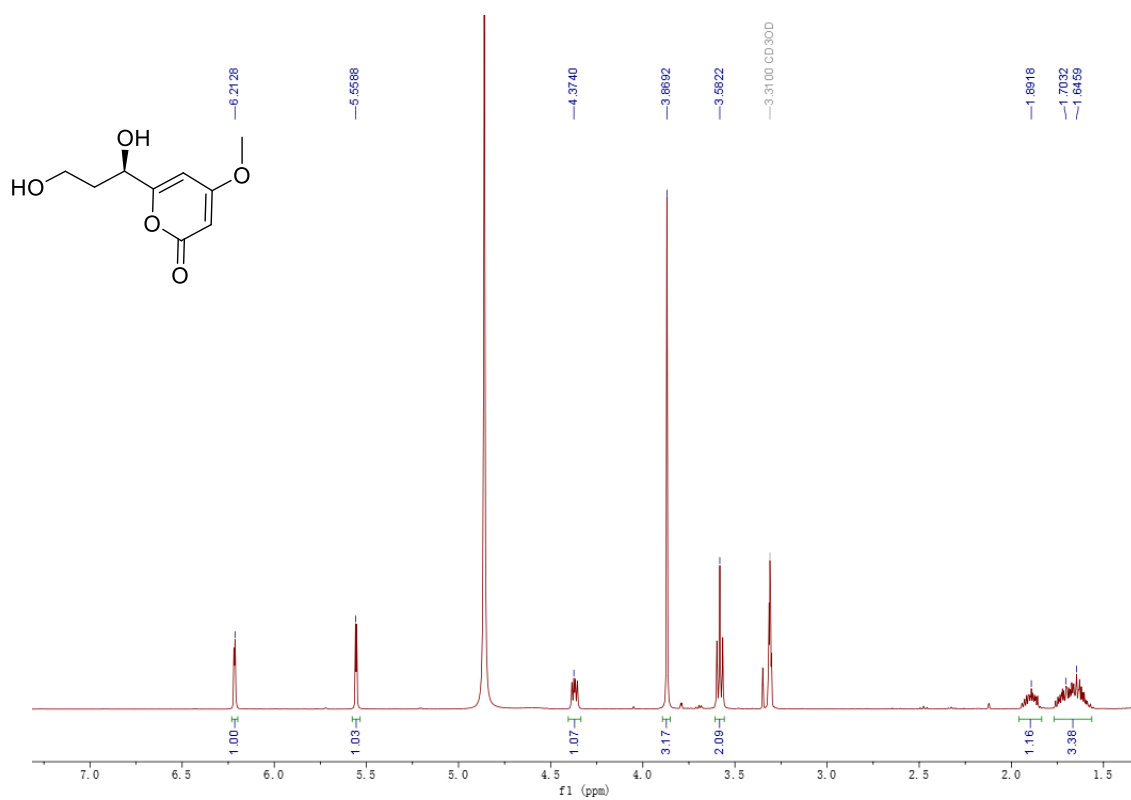

**Fig. S86** <sup>1</sup>H NMR spectrum of **9** in methanol-*d*<sub>4</sub> (600 MHz).

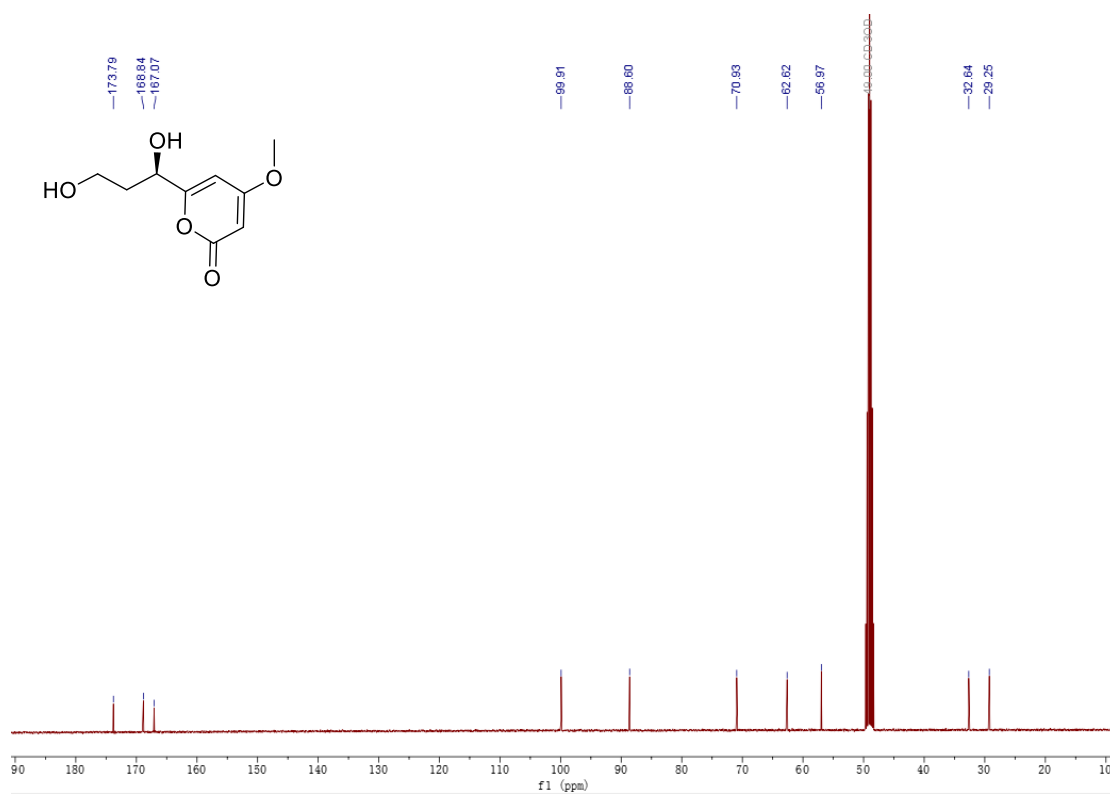

**Fig. S87** <sup>13</sup>C NMR spectrum of **9** in methanol-*d*<sub>4</sub> (150 MHz).



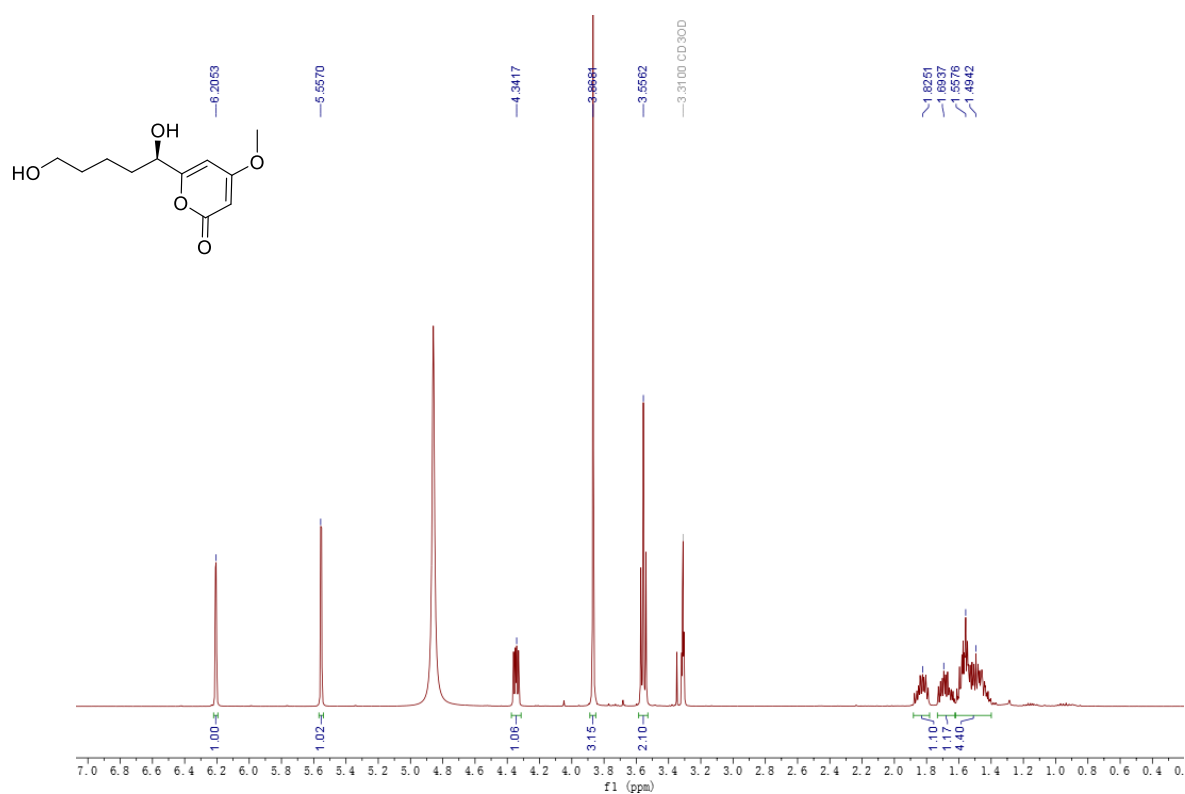

**Fig. S88** <sup>1</sup>H NMR spectrum of **10** in methanol-*d*<sub>4</sub> (400 MHz).

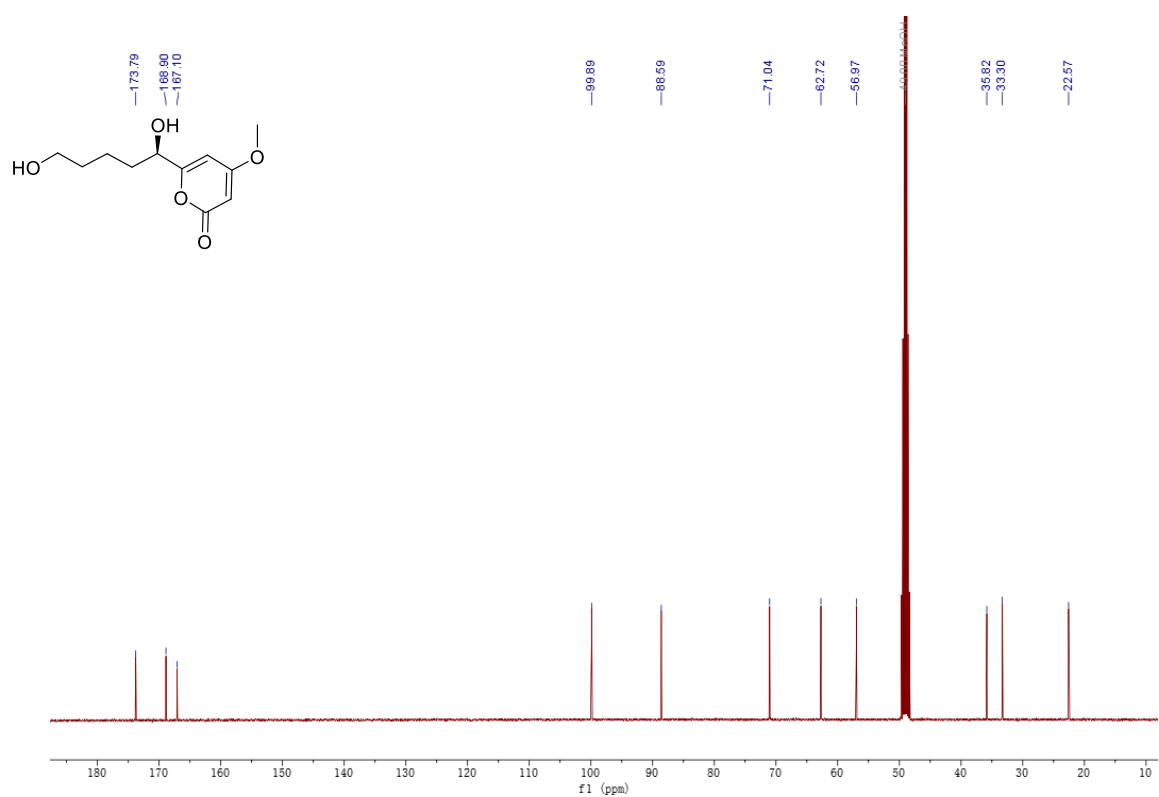

**Fig. S89** <sup>13</sup>C NMR spectrum of **10** in methanol-*d*<sub>4</sub> (100 MHz).

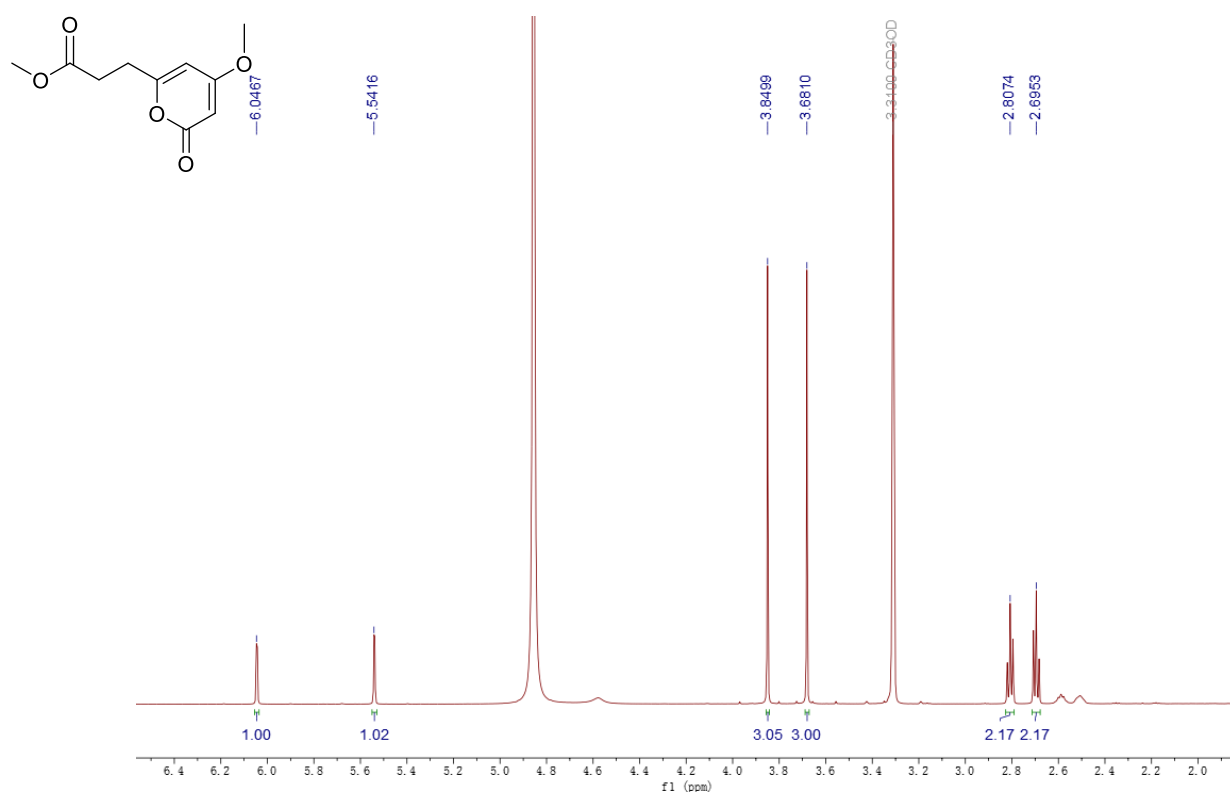

**Fig. S90** <sup>1</sup>H NMR spectrum of **11** in methanol-*d*<sub>4</sub> (600 MHz).

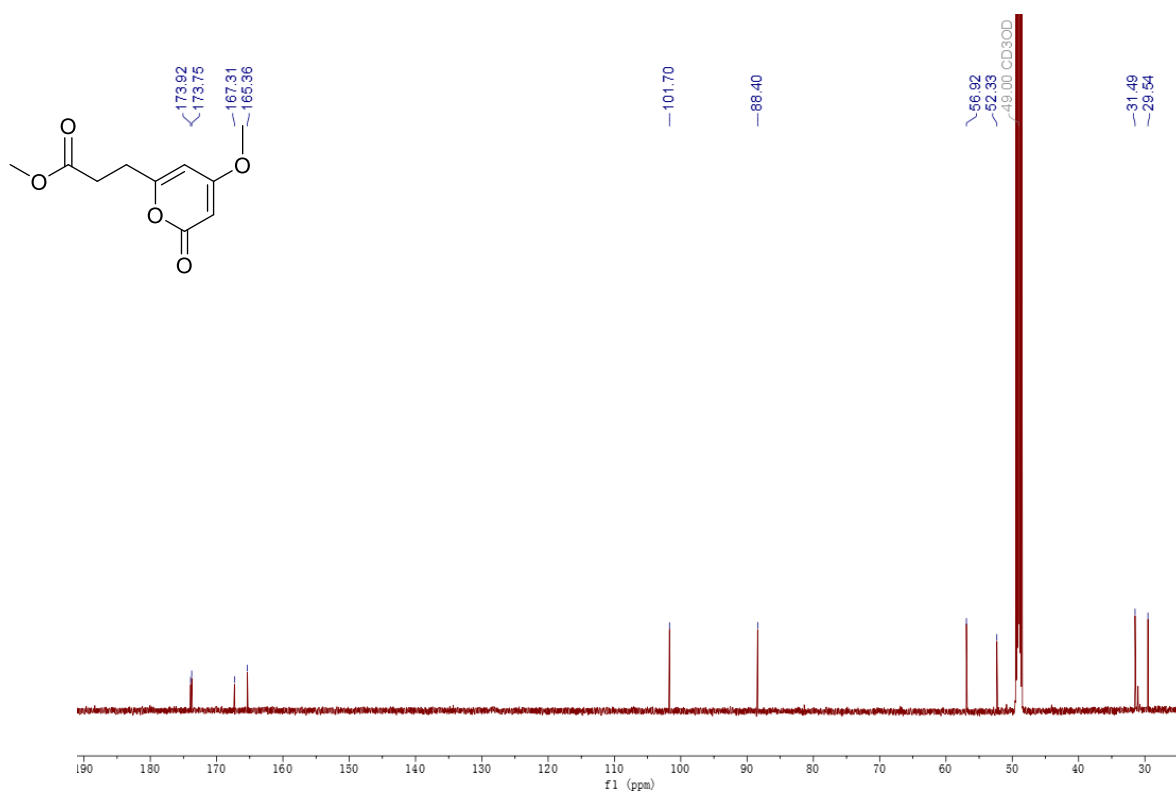

**Fig. S91** <sup>13</sup>C NMR spectrum of **11** in methanol-*d*<sub>4</sub> (150 MHz).

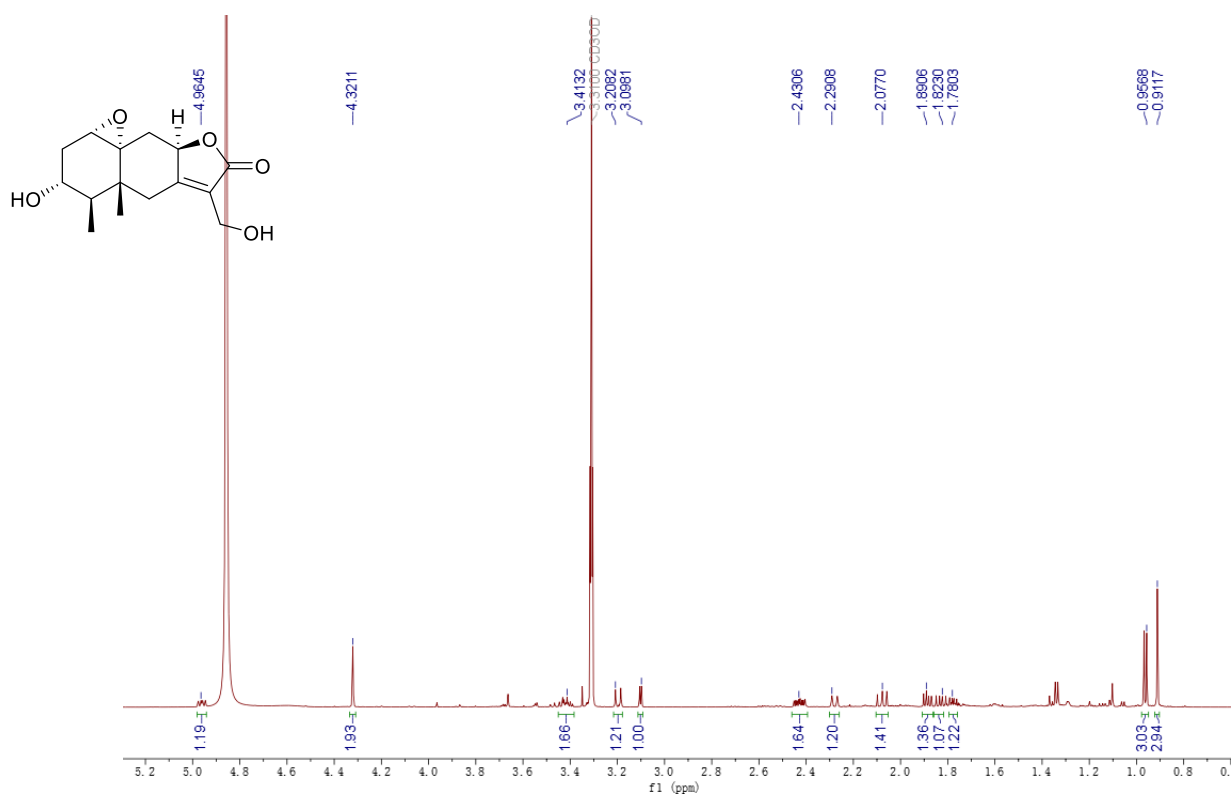

**Fig. S92**  $^1\text{H}$  NMR spectrum of **12** in methanol- $d_4$  (600 MHz).

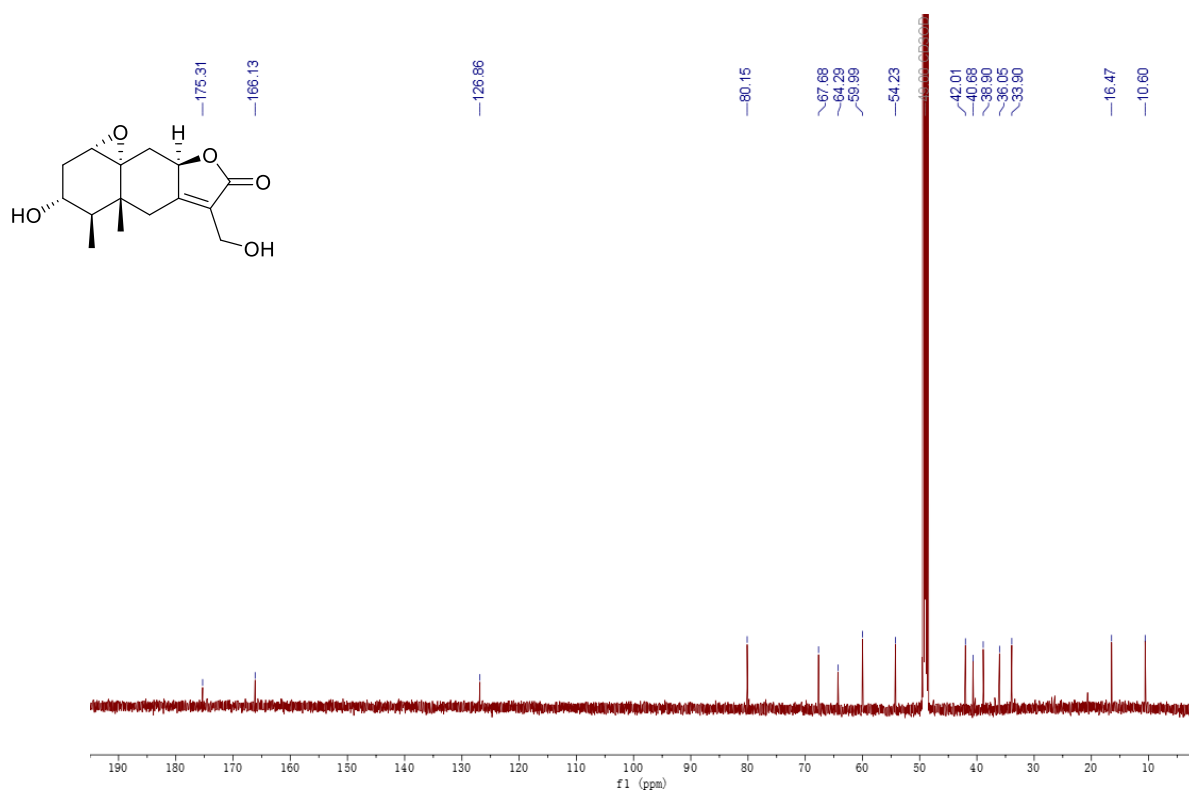

**Fig. S93**  $^{13}\text{C}$  NMR spectrum of **12** in methanol- $d_4$  (150 MHz).

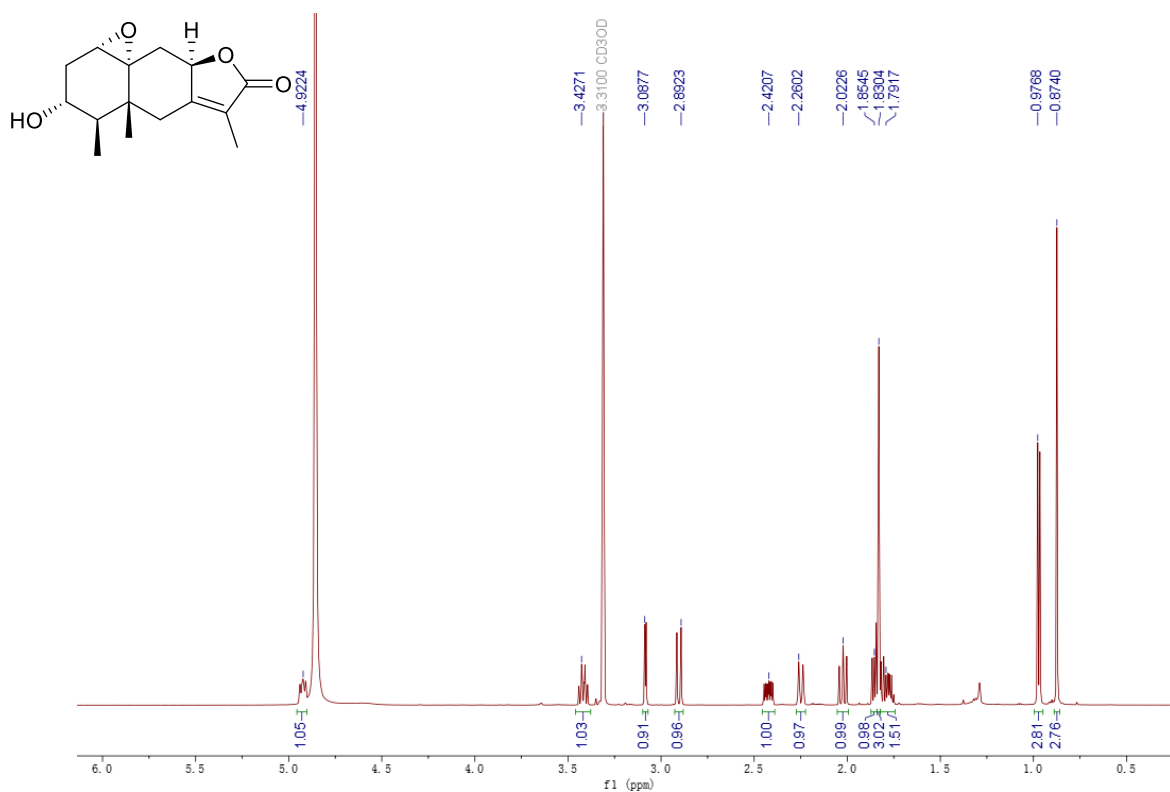

**Fig. S94** <sup>1</sup>H NMR spectrum of **13** in methanol-*d*<sub>4</sub> (600 MHz).

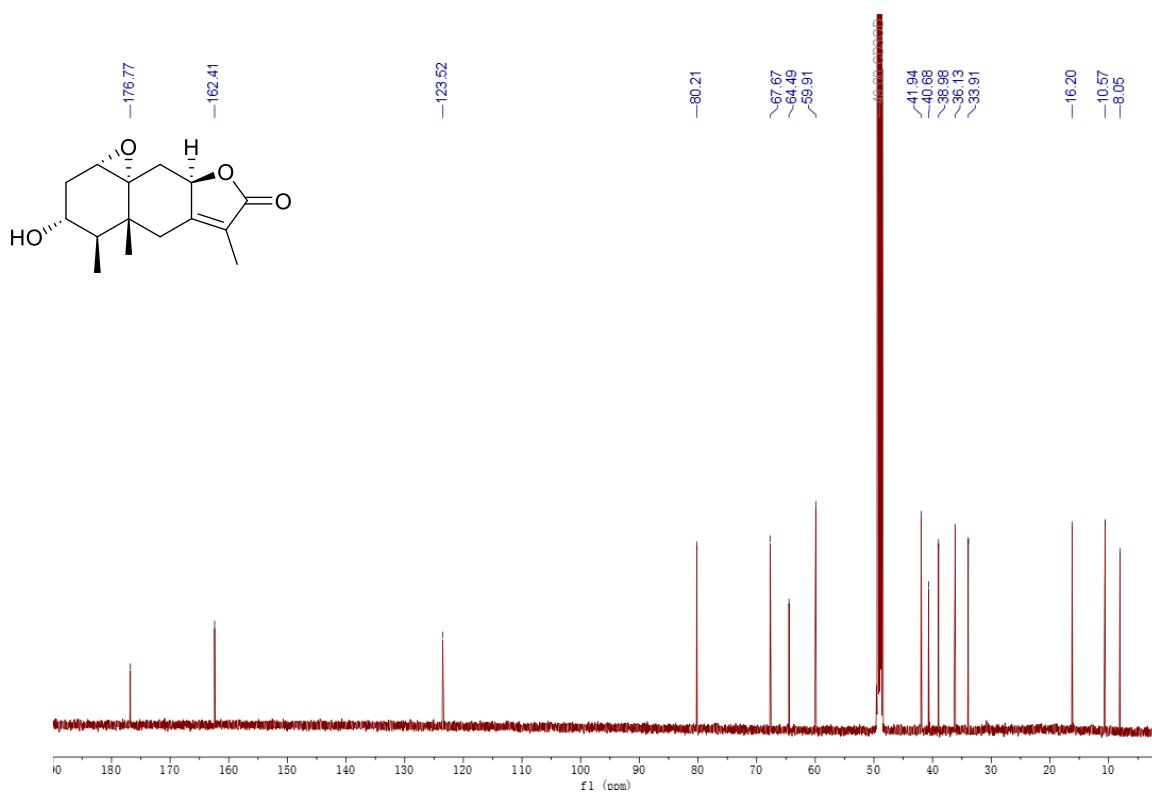

**Fig. S95** <sup>13</sup>C NMR spectrum of **13** in methanol-*d*<sub>4</sub> (150 MHz).

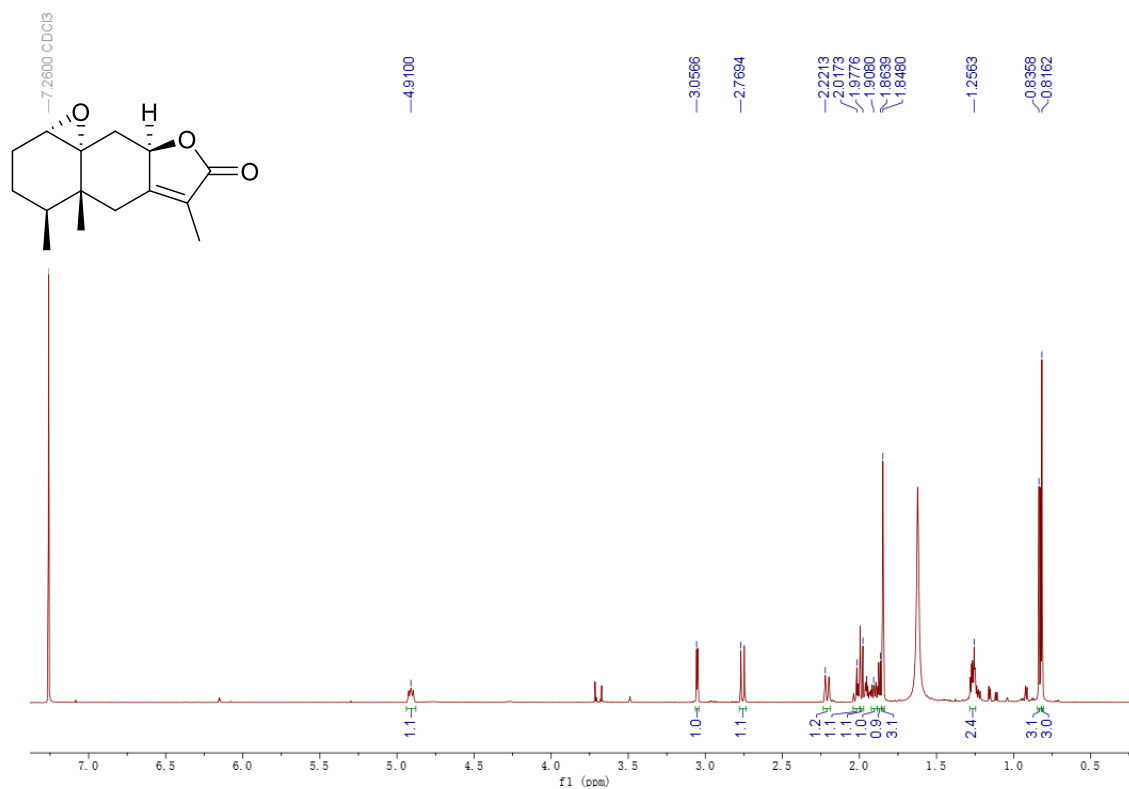

**Fig. S96** <sup>1</sup>H NMR spectrum of **14** in chloroform-*d* (600 MHz).

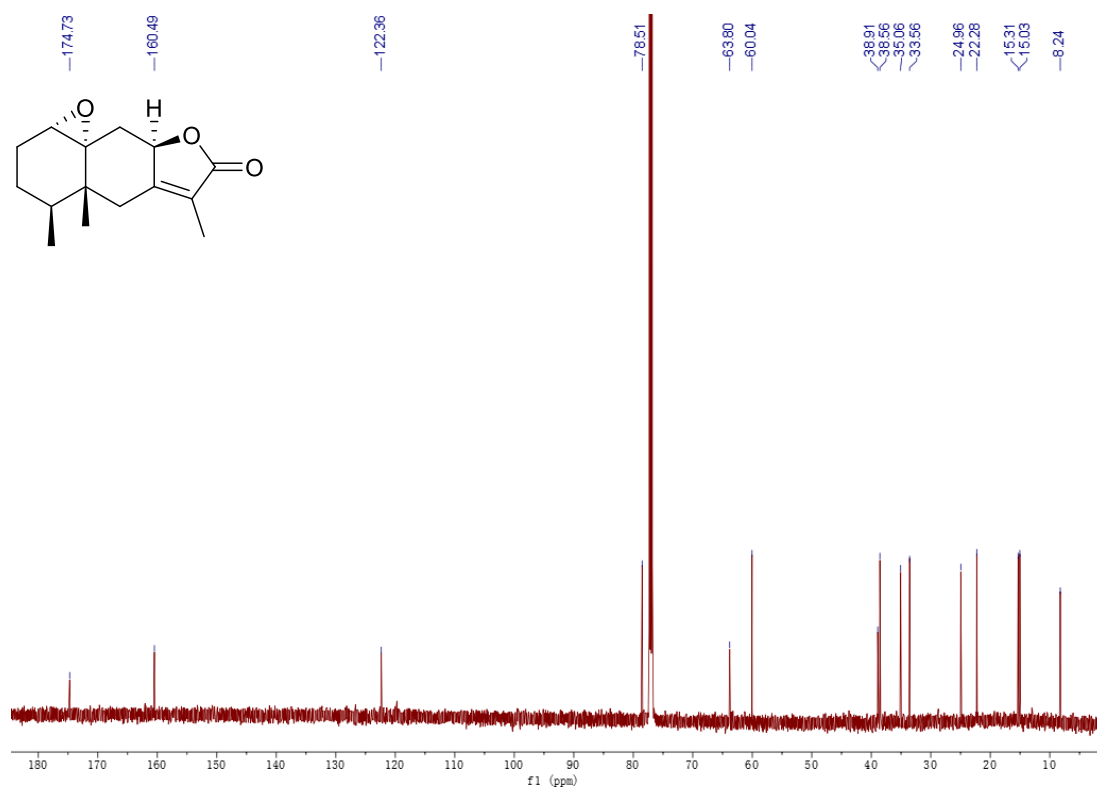

**Fig. S97** <sup>13</sup>C NMR spectrum of **14** in chloroform-*d* (150 MHz).

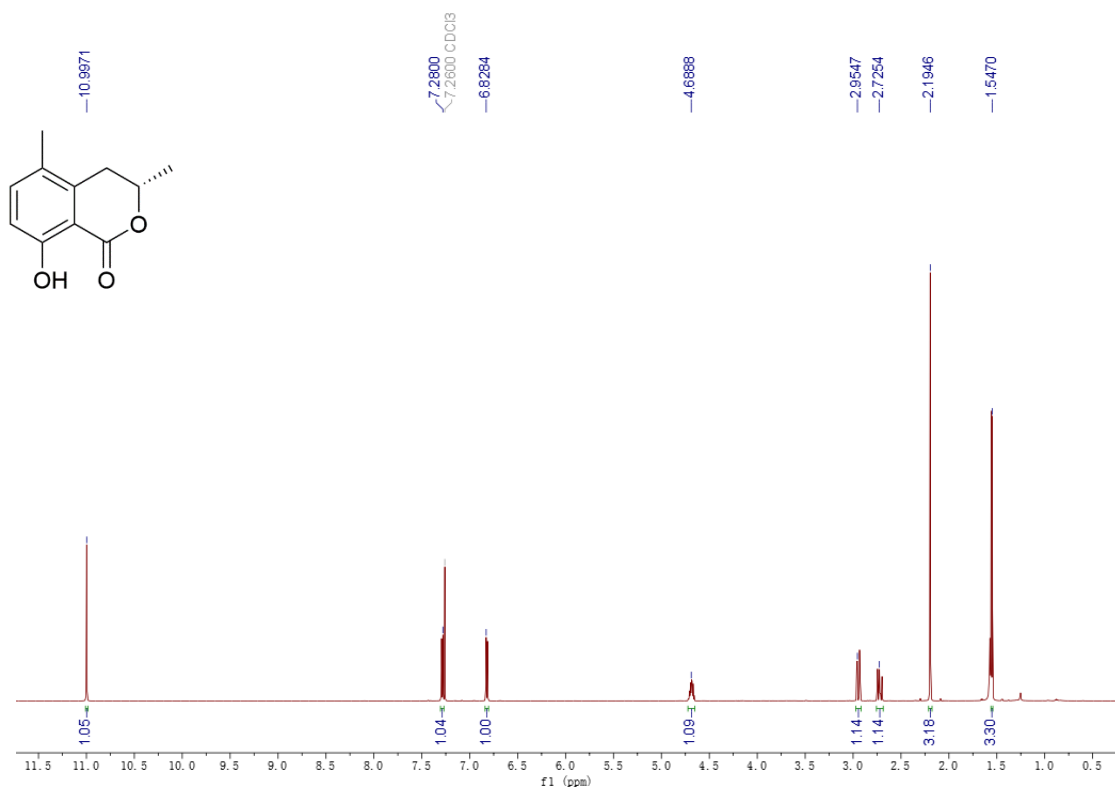

**Fig. S98** <sup>1</sup>H NMR spectrum of **15** in chloroform-*d* (600 MHz).

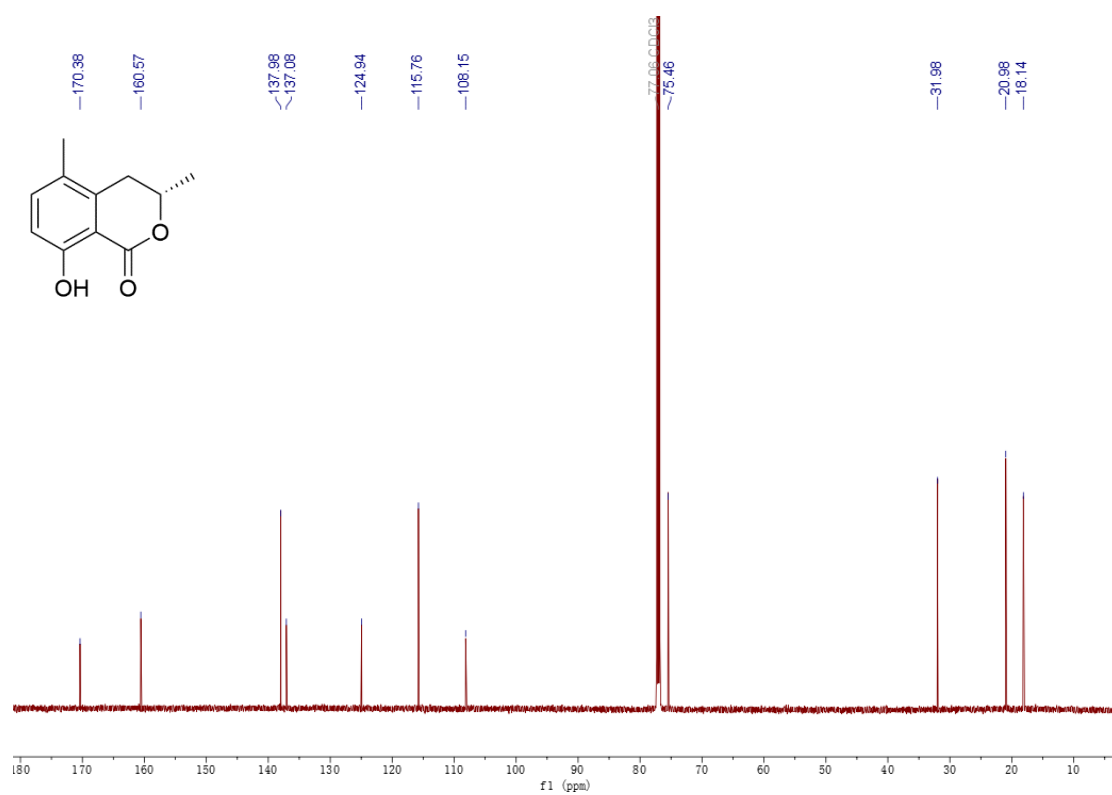

**Fig. S99** <sup>13</sup>C NMR spectrum of **15** in chloroform-*d* (150 MHz).

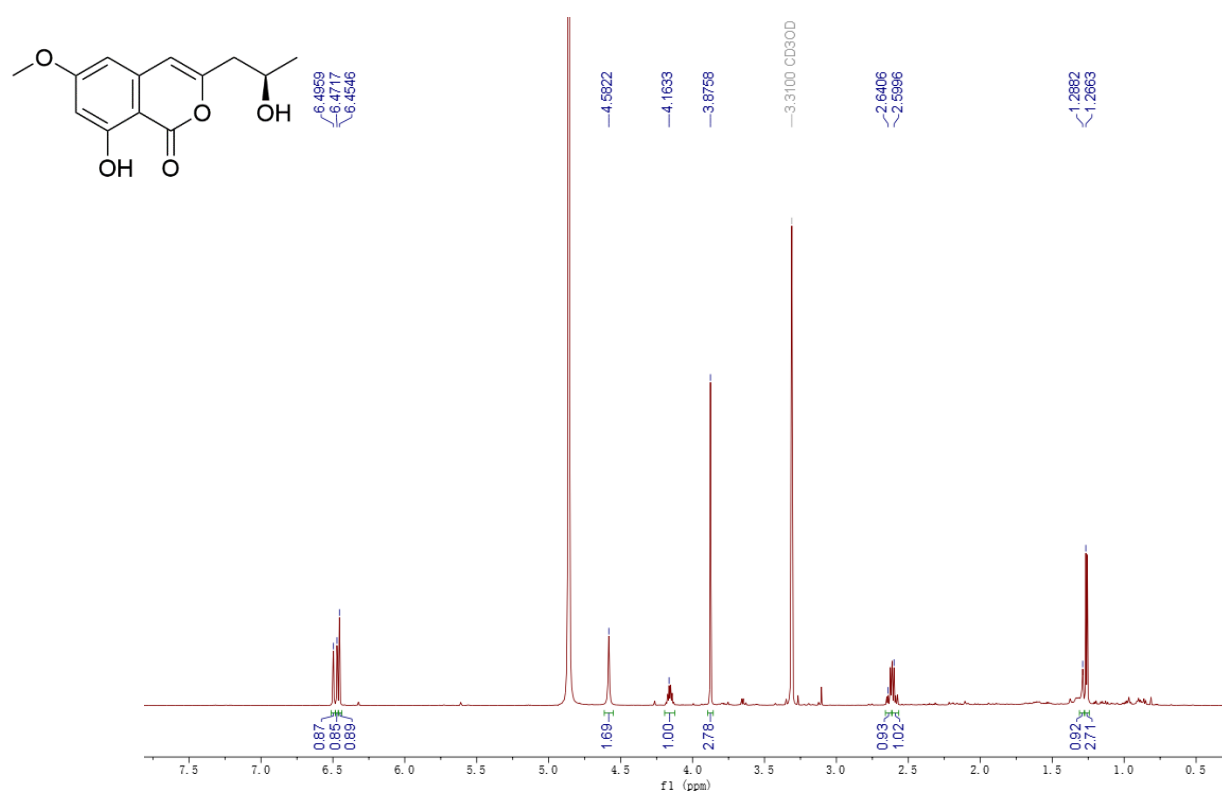

**Fig. S100** <sup>1</sup>H NMR spectrum of **16** in methanol-*d*<sub>4</sub> (600 MHz).

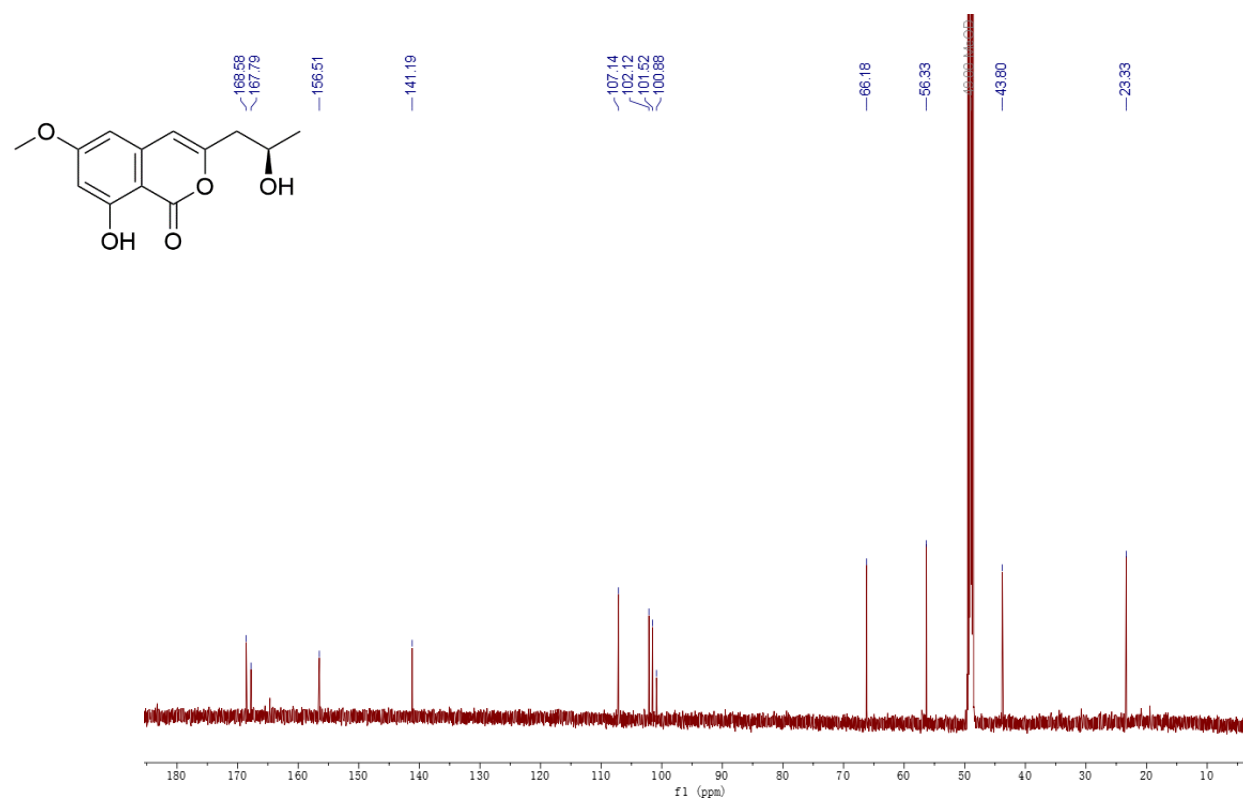

**Fig. S101** <sup>13</sup>C NMR spectrum of **16** in methanol-*d*<sub>4</sub> (150 MHz).

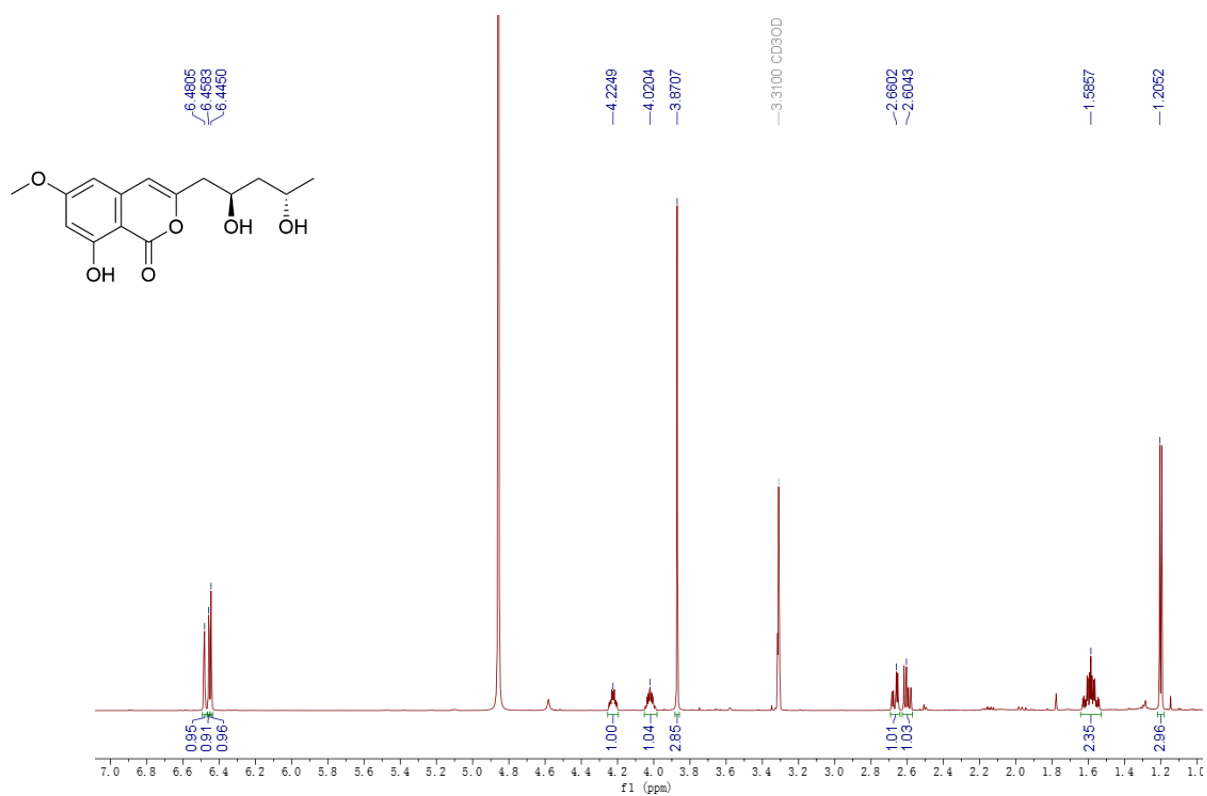

**Fig. S102** <sup>1</sup>H NMR spectrum of **17** in methanol-*d*<sub>4</sub> (600 MHz).

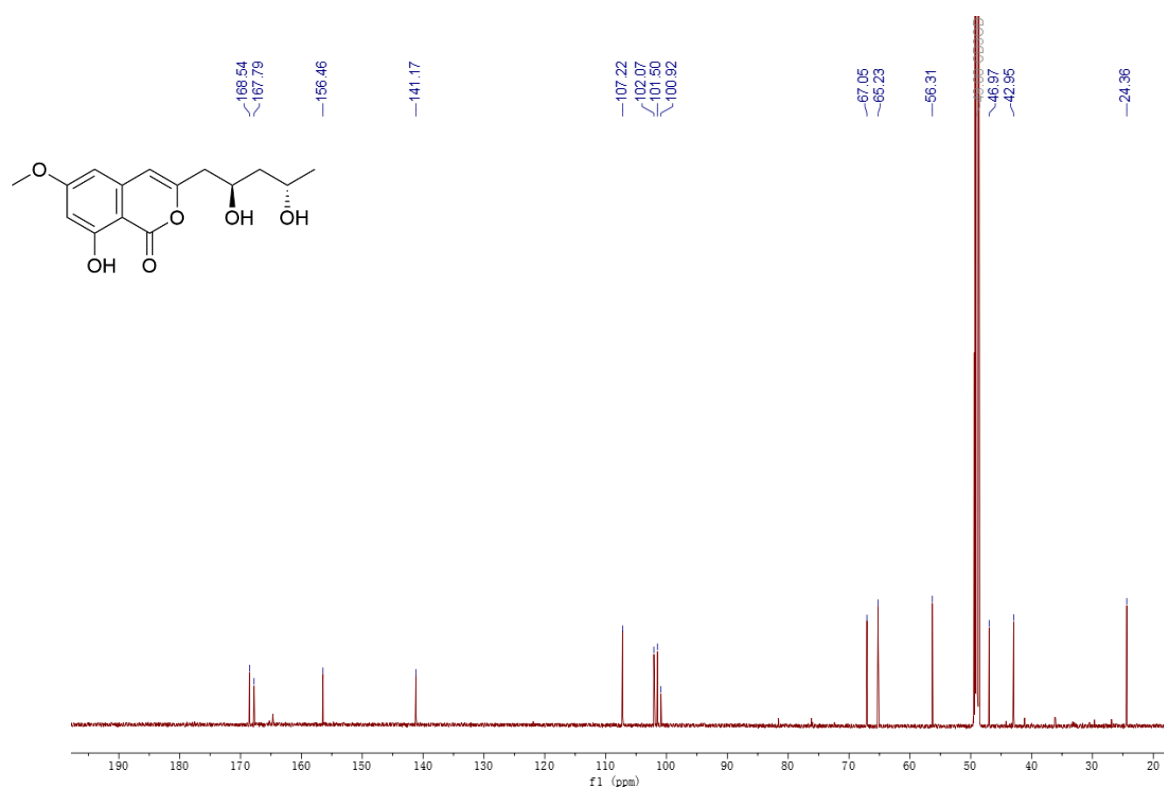

**Fig. S103** <sup>13</sup>C NMR spectrum of **17** in methanol-*d*<sub>4</sub> (150 MHz).



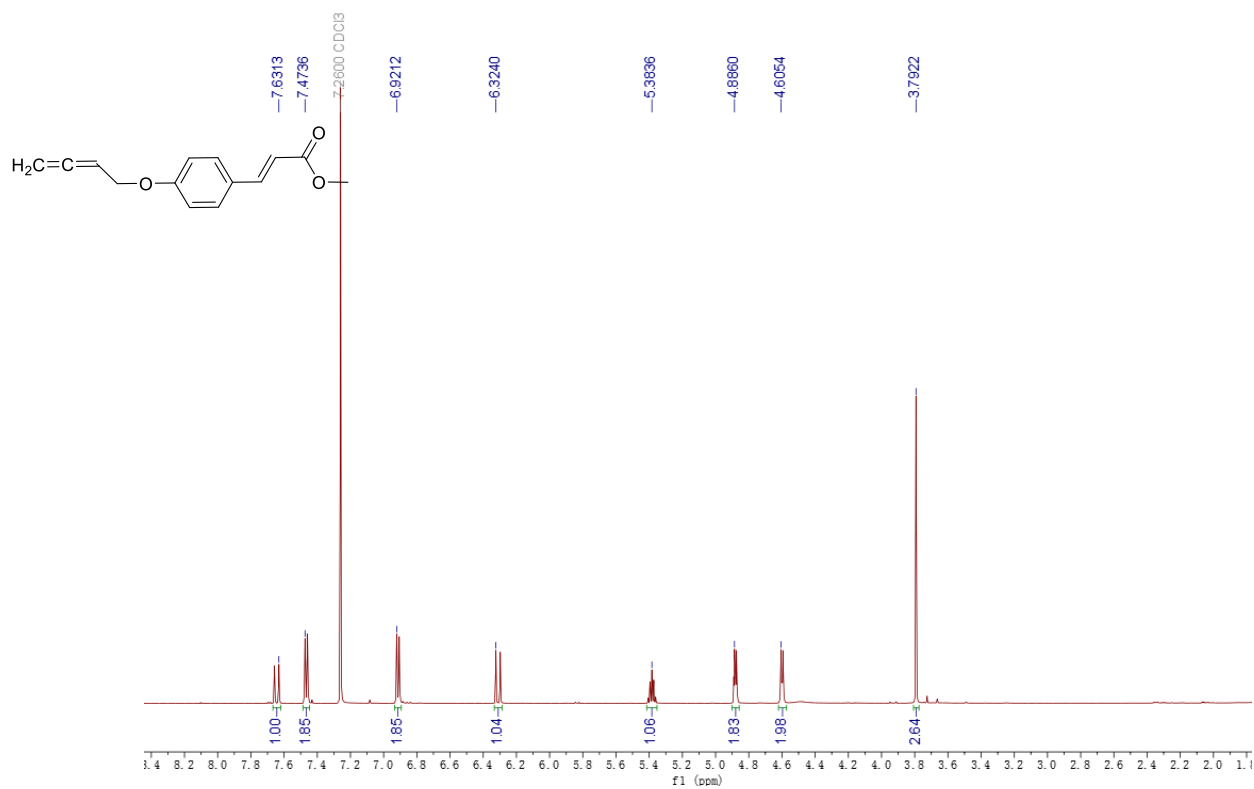

**Fig. S104** <sup>1</sup>H NMR spectrum of **18** in chloroform-*d* (600 MHz).

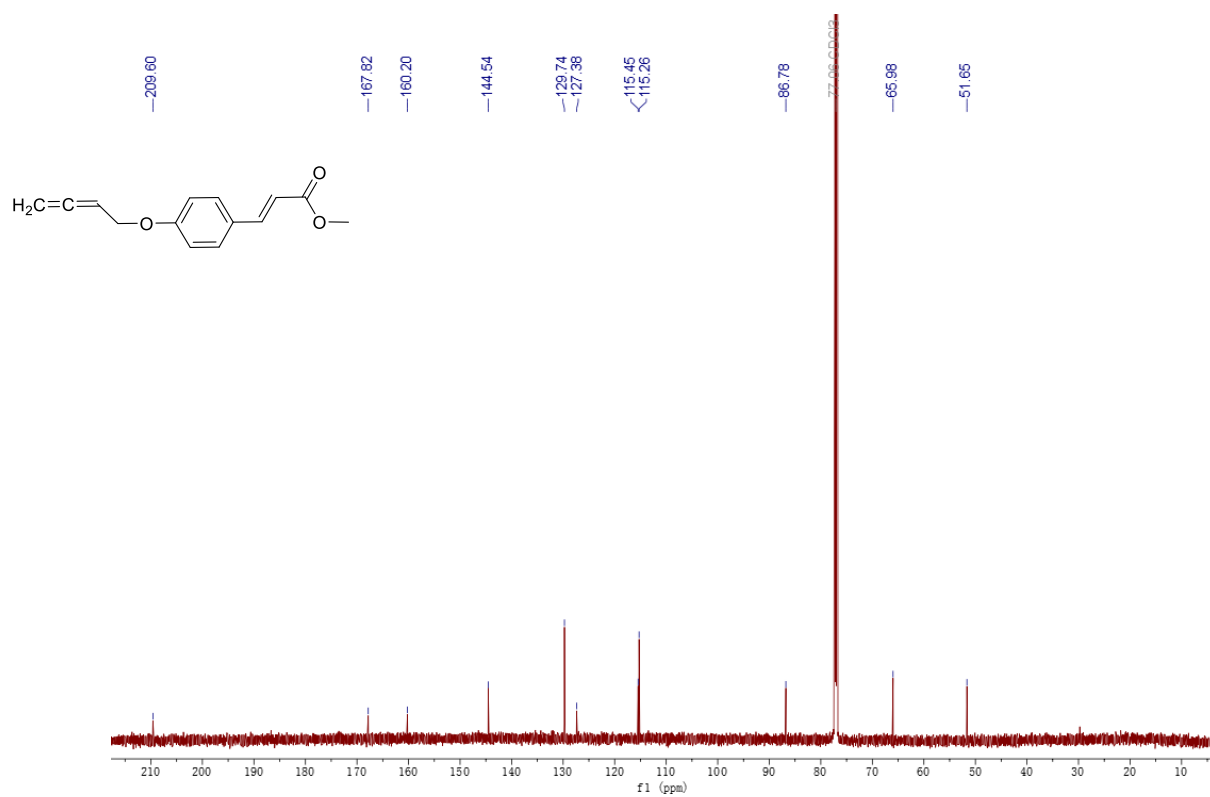

**Fig. S105** <sup>13</sup>C NMR spectrum of **18** in chloroform-*d* (150 MHz).

HPLC system: Waters, Waters e2695 pump, Waters 2996 detector.

-Column: XB-C18, 5  $\mu\text{m}$ , 4.6  $\times$  250 mm.

-Solvent system.

| Time (min),<br>Flow rate (1 mL/min) | MeOH (%) | Water (%) |
|-------------------------------------|----------|-----------|
| -                                   | 10       | 90        |
| 40                                  | 100      | 0         |
| 50                                  | 100      | 0         |

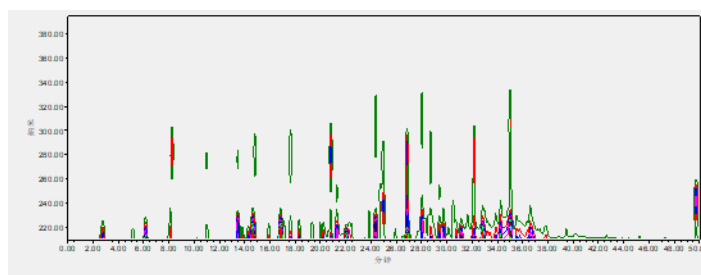

(a) HPLC analysis

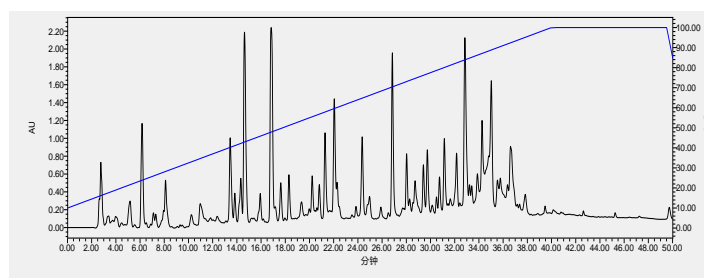

Wavelength at 215 nm.

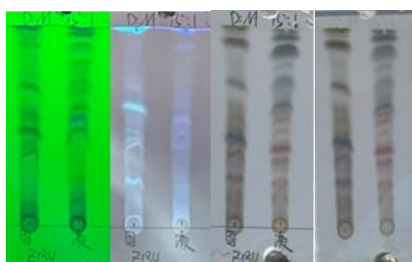

(b) TLC analysis (dichloromethane: methanol = 15:1) of crude extract.

**Fig. S106** The TLC and HPLC profiles of the crude extract of *Xylaria* sp. Z184.
